# Supplementary material for: Leaf Transcription Factor Family Analysis of Halophyte Glaux maritima under Salt Stress
Source: MDPI journal article supplement (doi:10.3390/agriculture13071404), 2023-07-14
Supplement: s1 [file s1]

ABF protein sequence information

>Unigene0003302

RPPNIFPLTRQSSVYSLTFDEFQSTVGGSIGRDFGSMNMDELLKNIWTTEETQHISGPSGNP  
CNYLQSQGS LTPRTLSQKTVDEVWKDLSGEKTDPLRQPTLGEVTLEEFLLRAGVVREE  
TKFPEKPHNFDLLGDLTRRPVSDQPLGFGFQNANGHIVNNNNRSELRADNIQVPLNGTRQQ  
LILPKQAQLSYANQIPIQGLNGNLVHNGGQGMIGNGVTVATESAALS YDGIGRTNGDNSY  
VSPIPYVFTGGLRGRRSSNKVEKVIERRHRRMIKNRESAARSARKQAYTTELEKEIAKLK  
EENQELLKKQAE LRKMQKKQVFEMMNMPRGGKRKRLKRTRTGPW

>Unigene0007479

MGSYMNFG EAPLNRGTGLEAAVTTPLIRQSSVYSLTFDEFQNTLGGSGKDFGSMNMDELL  
KSIWTAEETQAMATSSKVLGQGTCNNISSGNLQRQGS LTPRTLSQKTVDEVWREVFSEN  
SGVKDVSNNPSLGSNLQQQRQPTLKEVTLEEF LFKAGVVREDAPPQMAKQNNNGFYV  
GFQNNIGMNNSILNGNMSVVRPSQQLPPLPKESIVTFASSMPMANNTT IASPGTRGL  
FKGGPLGIGGLASGAVKGSTVNQLSPDVAAGSSGDVSSVSPPSYMLTSGASRRKG GTLEK  
AMERRHRRMIKNRESAARSARKQAYTLELEAEVAKLKEMNEELRKKQE EFMEMQKNQ  
VL

>Unigene0007480

MGSYINFKVN SPQNQINVSKPSITPLQRQSSIFELTFDEFQNTLGGNGKDFGSMNLDEF LN  
NIWTAEETQTMATSAVAGNLQRQDSLTPPILGQKTVDDVWIEMFKENCGGKEVNSPNLQ  
QQQRHPTLGEVTLEEF LSRAGVASETDDDIGFNRNNIVMKTEIMENNFPINTSGMRPSQQ L  
ASIGTRGPILGISDYSVKNGLFQGGALGVGALLSGDKQFSPDGDTSARGRKGV SLEKATER  
RNKRMIKNRESAERSARKQAYTFELEAEVAKLKEINDELLKKQDEITDMQKNQVQETK  
QMPPENKKLCLRRTLTGPW

>Unigene0007482

MGSYMNFKNFGETPQNQCTGSIPSVSTPLVRQSSIFELTFDEFQNTLGGGGKDFGSMNMD  
EFLKNIWTAEETQAMATSAVFGQGSNNAPSGNLQRQGS LTPRTLSQKTVDEVWREMYK  
ENCGVKDVNPPNL PQQRQPTLGEVTLEEF LFKAGVVREDAQQMVRAHNNGFYNGGSS  
EPNNNTGLTIGFQQPPHNNIVANNQILENNNLVPNQLSSLPMNMSGIRPSQQLPQSLFPKQS  
TVNFTSSMPMTNNTQLASPGTMGPVIGISDPSIKNGIFQGGPLGMGALFPGAKMNGVMAS  
PAKQLSPDGDMSVSSPSYRVGDGGRGRKSGTLEKATERRHHRMIKNRESAARSARKQ  
AYTLELEAEIAKLKETNEELRKKQDEIMEMQKNQVQETMKTPWGNKKQCLRRTLSGPW

>Unigene0078257

MNFKNFSDEPPGSGGSRPPNIFPLARQSSVYSLTFDEFQSTMGGSIGKDFGSMNMDELLK  
NIWTAEDIQQPAGQANPDSSGNPSNYLQRQGS LTPRTLSQKTVDEVWKDLSTGMTNLPL  
RQQTLEVTLEEF LFRAGVVREEQKLPEKPQNFDLLGDLTRPVSNQPLGFGFQNTGNNNK  
QQPIFPKQPAFAYNNCIPNANSTQVVNP GIRTGMTGIADPHHPNSNGRMGMVGITDPHHP  
PDGGLGMIGNGVTVATDSPTLSSDGIGRNNGDNSSVSPLPYIFTGGLRGRRSNNAVEKVIE  
RRQRMIKNRESAARSARKQAYTTELEAEVAKLKEENEKLLKKQAEIMEMQKNQVSE  
MMTMPQGGKRRRLTRTQTGPW

> Actinidia\_chinensis(Achn131571)

MNFRNFENEARVELGAGGGGRPPGIFPLARQSSVYSLTFDEFQSTIGGSEKDFGSMNMDE  
LLKNIWSAEEIQT LGSTSVGQEGVASGGYLQRQGS LTPRTLSQKTVDEVWRDLAKESSG  
GTDWNSAGGMNLPQRQRTFGEMTLEEF LVRAGVVREDVQLPMKPNNNGFFGDLTGSGN  
NNGVGIGFQQMGRNMGLVGNRIPEVNNQTAIQSANLPLNVNGVRSSQQQLFMPQQQQQ

QQHQQLFPKQPTLAYTNPMPIPSSTQLNSQGIRGGIVGITDQSMNGNLVQSGALQGGGMG  
MIGFWAGAVTVATGSPASDGLARSNGDMSSVSPVPYVFNGGLRGRKGNHPVEKVVERRQ  
RRMIKNRESAARSARKQAYTMELEAEVAKLKEENEELRKKQEEILEMWKNQVLEMMN  
TELGVKRRCLRRTQTGPW

>Arabidopsis\_thaliana(AT4G34000.1)

MGSRLNFKSFVDGVSEQQPTVGTSLPLTRQNSVFSLTFDEFQNSWGGGIGKDFGSMNMDE  
LLKNIWTAESHSMGNNTSYTNISNGNSGNTVINGGGNNIGGLAVGVGGESGGFFTGGG  
LQRQGSLLTPRTISQKRVDVWKEMLKEDDIGNGVVNGGTSGIPQRQQTLEEMTLEEFV  
RAGVVREEPQPVESVTNFNGGFYGFSGNGGLGTASNGFVANQPQDLSGNGVAVRQDLLT  
AQTQPLQMQQPQMVQQPQMVQQPQQLIQTQERPFQKQTIAFSNTVDVVNRSQPATQCQ  
EVKPSILGIHNHPMNNNLLQAVDFKTGVTVAASVSPGSQMSPDLTPKSALDASLSPVPMFG  
RVRKTGAVLEKVIERRQKRMKNRESAARSARKQAYTMELEAEIAQLKELNEELQKKQ  
VE IMEKQKNQLEPLRQPWGMGCKRQCLRRTLTGPW

>Arabidopsis\_thaliana(AT4G34000.2)

MGSRLNFKSFVDGVSEQQPTVGTSLPLTRQNSVFSLTFDEFQNSWGGGIGKDFGSMNMDE  
LLKNIWTAESHSMGNNTSYTNISNGNSGNTVINGGGNNIGGLAVGVGGESGGFFTGGG  
LQRQGSLLTPRTISQKRVDVWKEMLKEDDIGNGVVNGGTSGIPQRQQTLEEMTLEEFV  
RAGVVREEPQPVESVTNFNGGFYGFSGNGGLGTASNGFVANQPQDLSGNGVAVRQDLLT  
AQTQPLQMQQPQMVQQPQMVQQPQQLIQTQERPFQKQTIAFSNTVDVVNRSQPATQCQ  
EVKPSILGIHNHPMNNNLLQAVDFKTGVTVAASVSPGSQMSPDLTPKSALDASLSPVPMFG  
RVRKTGAVLEKVIERRQKRMKNRESAARSARKQAYTMELEAEIAQLKELNEELQKKQ  
VE IMEKQKNQLEPLRQPWGMGCKRQCLRRTLTGPW

> Nicotiana\_tabacum(XP\_016506615.1)

MGSNFNFKNFGNEPPGEGGKQPGNFQLPRQPSIYSLTFDEFLLSTTGGSGKDFGSMNMDEL  
LKNIWNAEESQTMGGSGINGQEVGGVQSGHLQRQGSLLTPRTLCHKTVDEVWRDMSKE  
YGGGKDGNSVGVPTNLPQRQQTLEITLLEFLVRAGVVREDAQLVAKSNNVGGIFADLSY  
AGNNTGLGFGYQHQQTNRTGETGIQAANLPLNVNGVRSTQQQLRAQQLQQQQPQPQQ  
QQPHQQPLFPKQPALAYAAPMAIPNSGQLGSPGMRGGMVGISDPAINSNFVQGAALTGGG  
IGMVGLGAGGVTVATASPAVSSDGLGKSNGDTPSVSPLPYVFNGGIRGRKYSTVEKVVER  
RQRRMIKNRESAARSARKQAYTMELEAEVAKLKEENEELQKKQEEMLEIQKNQVMMEM  
MNLQKG AKRRCLRRTQTGPW

>Nicotiana\_tabacum(XP\_016486495.1)

MGSYLNFKNFADTSQPESGGKPMNNDNFSLARQSSIYSFTFDELQSTCGLGKDFGSMNM  
DDLKNIWTAESQAMSSSVAGGNVSPVGNLQRQGSLLTPRTISQKTVDVWKDFQKET  
VNANDGSAPGASNFGQRQSTLGEMTLEEFVLRAGAVREDMQPTRYSKDVTFTSGFTQPSS  
NSSLNIAFQQATQNPQQLSNQAENSIFNVTTTSSQKPPQAQPLFPKQTTVAFASPMQ  
LGNTAQLASPGTRAPIVGMSNPVNTSIIQGSIMQGGVMDMAGLHNGVTSVKGGSPGNL  
DPSSLSPSPYAFGEGGRGRRSCNSLEKVVERRRRKRMKNRESAARSARKQAYTLELEAE  
VEKLKEINEELQKKQAEFIEMQKNQLMEKMNPWGNKLRCLRRTLTGPW

>Nicotiana\_tabacum(XP\_016441338.1)

MGSYMNFKNFADTPLTESNGGMSMGSGNFPLARQSSVYSLTFDELQSTCGLGKDLGSMN  
LEDLLKNIWTAESNVVASAAGVGNANTTGGNLQRQGSLLTPRTLSQKTVDVWRDFQK  
ETTISSKDGSGTEWPNLGQRQSTLGEMTLEEFVLRAGVVREDMQPTGSSTDVRFTHGLLSQ  
PSTNNNGLNIAFQQPTQTPGLLSNQFEDNNMLNVVSATSSQQILNVAFTSPMQLGTNVQL

ANAGAREPAVSMSSPSVNTSTIVQGSVMQGGTKGLAGLRNGVTPAKRGSPGNQLSPDMM  
SKKVLDRSSLSPPYAFIEGGKGRRPCNSLEKVVERRRRKRMKNRESAARSARKQAYTLE  
LEAEVEKLKEINKELHKKQAEFIEMQKNQLMEKMNMPWGNKLRCLRRTLTGPW

>Nicotiana\_tabacum(XP\_016458525.1)

MGSYLNFKNFADSPQPESNGGKSMCNGNFPLARQSSVYSLTFDELQTTFSGLGKDFGSMN  
MEDLLKNIWTAETQATASTTGGVDGSVAAENLQRQGSITLPRTLSQKTVDEVWRDFQK  
ETVSAKEGSDTGNSNFGQRQSTLGEMTLEEFVLRAGVVREDMQCTNSNGITFDNGSSQQS  
NNNGLNIAFQQPTQNNGLLINQIAANNMLNVVGATPSQQQPQHQQPLFPKQTTVAFASPM  
QLSNNHGLASPRTRAPVVGMS

GSSVNTNMAQGGVVRGMAGFHNGVSPAKGGSPGNDFVARSNNTDTSSLSPSPYAFNEGVRG  
RRSGSSLEKVVERRRRRMKNRESAARSARKQAYTLELEAEVAKLKEINEELRKKQAEI  
MEKQKNQLLEKRNMPGKYLRLCLRRTLTGPW

>Nicotiana\_tabacum(XP\_016441813.1)

MNFKNFADTPQTESNSGMSMGSGNFPLARQYSVYSLTFDELQSTCGLGKDLGSMNLEDL  
LKNIWTAEEESQVVASSAGVGNLQREGSLTLPRTLSQKTVDELWRDFQKETTSSKDVSGT  
EWPNLGQSSTLGEMTLEEFVLRAGVVREDMQPTGSTNDVRFTGGISQPSTNNNGLNIAF  
QQPTQNPGLFSNQFEEKNMLNVVSATSSQQKPNVAFASPMQLGKNGQLASTAAREPVVS  
MLSPSVNTSTIVQGSVMQGGVKGLAGLHNGVALAKRGSPGNQLSRDMIKKDQDTSSLS  
PSPYAFGEGGRGRRSCNSLEKVVERRRRKRMKNRESAARSARKQAYTLELEAEVEKLKE  
INEELQKKQAEFIEMQKDQLMEKMNMPWGNKLRCLRRTLTGPW

>Nicotiana\_tabacum(XP\_016441811.1)

MNFKNFADTPQTESNSGMSMGSGNFPLARQYSVYSLTFDELQSTCGLGKDLGSMNLEDL  
LKNIWTAEEESQVVASSAGVGNLQREGSLTLPRTLSQKTVDELWRDFQKETTSSKDVSGT  
EWPNLGQSSTLGEMTLEEFVLRAGVVREDMQPTGSTNDVRFTGGISQPSTNNNGLNIAF  
QQPTQNPGLFSNQFEEKNMLNVVSATSSQQKPNVAFASPMQLGKNGQLASTAAREPVVS  
MLSPSVNTSTIVQGSVMQGGVKGLAGLHNGVALAKRGSPGNQLSRDMIKKDQDTSSLS  
PSPYAFGEGGRGRRSCNSLEKVVERRRRKRMKNRESAARSARKQAYTLELEAEVEKLKE  
INEELQKKQAEFIEMQKDQLMEKMNMPWGNKLRCLRRTLTGPW

> Nicotiana\_tabacum(XP\_016441812.1)

MNFKNFADTPQTESNSGMSMGSGNFPLARQYSVYSLTFDELQSTCGLGKDLGSMNLEDL  
LKNIWTAEEESQVVASSAGVGNLQREGSLTLPRTLSQKTVDELWRDFQKETTSSKDVSGT  
EWPNLGQSSTLGEMTLEEFVLRAGVVREDMQPTGSTNDVRFTGGISQPSTNNNGLNIAF  
QQPTQNPGLFSNQFEEKNMLNVVSATSSQQKPNVAFASPMQLGKNGQLASTAAREPVVS  
MLSPSVNTSTIVQGSVMQGGVKGLAGLHNGVALAKRGSPGNQLSRDMIKKDQDTSSLS  
PSPYAFGEGGRGRRSCNSLEKVVERRRRKRMKNRESAARSARKQAYTLELEAEVEKLKE  
INEELQKKQAEFIEMQKDQLMEKMNMPWGNKLRCLRRTLTGPW

>Nicotiana\_tabacum(XP\_016444817.1)

MQYCLLVNIIYLLGLHQNIKNESHGQLLPDLLLLLRVLRNLNLFTRFYSPSPSHTMGSYLN  
KNFADTSQ

PESSGGKPMNNDNFSLARQSSIYSFTFDELQSTCGLGKDFGSMNMDDLLKNIWTAEEESQA  
LSSSVAGGNVSPVGNLQRQGSITLPRTISQKTVDEVWKDFQKETVNANDGSAPGASNFG  
QRQSTLGEMTLEEFVLRAGAVREDMQPTRYSKDVTFTSGFTQPSSNNSSLTIAFQQATQNP  
QQLSNQIAGNNIFNVTTTSSQQKPPQAQPLFPKQTTVAFASPMQLGNTAQLASPGTRAPI  
VGMSNPVNTTIIQGSIMQGGVDMAGLHNGVTSVKGGSPGNLDPSPSLSPSYACGEGGRG

RRSCTSFEKVVERRRRKRMKNRESAARSRRDKQAYTLELEAEVAKLKEIKQELQKKQAEF  
IEKQKNQLLEKMNMPWENKLICLRRTVTGPW

> *Nicotiana\_tabacum*(XP\_016451400.1)

MGSYLNFKNFADTPQPESYGGKSMCNGNFPLARQSSIYSLTFDELQTTFSGLGKDFGSMN  
MEDLLKNIWTAEESQATASTTGSDGSAAGNLQRQGSITLPTLSQKTVDEVWRVFQKE  
TVSAKEGSDTGNSNFGQRQSTLGEMTLEEFVLRVGVVREDMQCTNSNGITFDNGSSQHSN  
NNGLNIAFQQPTQNNGLLINQIAANNMLNVVGATPSQQQPQHQQPLFPKQTTVAFASPMQ  
LSNNGHLAPVGMSPSVNTNMAQGGVGRVTVFHNGVSPAKGGSPGNDFVARSNTDTSS  
LSPSPYAFNEGVRGRRSGSSLEKVVERRRRRMKNRESAARSRRDKQAYTLELEAEVAKL  
KEINEELQKKQAEIMEKQKNQLLEKRNMPGCGYKLRCLRRTLTGPW

> *Actinidia\_chinensis*(Achn227711)

MYFKNYGSEPPAVNGGVRPPEDFPLTRQQSIYSLTFHEFQSTVGGIGKEFGSMNMDELLRN  
IWSAEETQTMGSTYCGQESGAPGGYLQRQGSITLPTLSQKTVDEVWRDIATGGGGGGD  
SNLPQRQQTLEITLLEFLVRAGVVREDIQLPGKLSNSGGFGDLRPRNDSALGFGFQQMG  
QRTGLSNSNQIPTIQSANLPANVNGVRSTQQQMYIPQPQQQQQQQQQHSILTKQSNLAY  
ANPMPISNGTHLGSPGIRSGIVGNTDSSMNGNLVQGGGMGTIGLGAGGPVMPDGRGKS  
NGDMSSVSPVPYAFNGGLRGRKNGNAVEKVVERRHRRMIKNRESAARSRRDKQAYTTEL  
EEEVAKLKEENQVLRKRQVEIVEMQKNQVLEMMNTQQGAQRRCLRRTQTSPW

> *Nicotiana\_tomentosiformis*(XP\_009592272.1)

MGSNFNFKNFGNEPPGEGGKQPGNFQLPRQPSIYSLTFDEFLSTTGGSGKDFGSMNMDEL  
LKNIWNAEESQTMGGSGINGQEVGGVQSGHLQRQGSITLPTLSHKTVDDEVWRDMSKE  
YGGGKDGNSVGV  
PTNLPQRQQTLEITLLEFLVRAGVVREDAQLVAKSNNVGGIFADLSYAGNNTGLGFGYQ  
HQQTNRNTGETGIQAANLPLNVNGVRSTQQQLRAQQLQQQPQPQQQPPHQQPLFPKQP  
ALAYATPMAIPNSGQLGSPGMRGGMVGTSDPAINSNFVQGAALTGGGIGMVGLGAGGVT  
VATASPAVSSDGLGKSNGDTPSVSPLPYVFNGGIRGRKYSTVEKVVERRQRRMIKNRESAA  
RSRARKQAYTMELEAEVAKLKEENEELQKKQEEMLEIQKNQVMEMMNLQKGAKRRCL  
RRTQTGPW

> *Nicotiana\_tomentosiformis*(XP\_009592273.1)

MGSNFNFKNFGNEPPGEGGKQPGNFQLPRQPSIYSLTFDEFLSTTGGSGKDFGSMNMDEL  
LKNIWNAEESQTMGGSGINGQEVGGVQSGHLQRQGSITLPTLSHKTVDDEVWRDMSKE  
YGGGKDGNSVGV  
PTNLPQRQQTLEITLLEFLVRAGVVREDAQLVAKSNNVGGIFADLSYAGNNTGLGFGYQ  
HQQTNRNTGETGIQAANLPLNVNGVRSTQQQLRAQQLQQQPQPQQQPPHQQPLFPKQP  
ALAYATPMAIPNSGQLGSPGMRGGMVGTSDPAINSNFVQGAALTGGGIGMVGLGAGGVT  
VATASPAVSSDGLGKSNGDTPSVSPLPYVFNGGIRGRKYSTVEKVVERRQRRMIKNRESAA  
RSRARKQAYTMELEAEVAKLKEENEELQKKQEEMLEIQKNQVMEMMNLQKGAKRRCL  
RRTQTGPW

> *Manihot\_esculenta*(Manes.18G037900.1.p)

MGTNINFKNFTNDPSADAGGGAGSATRPPGNFPLARQTSIYSLTFDEFQNTMGGIGKDFGS  
MNMDELLKNIWSAEETQSMVASSGAAQENLQRQGSITLPTLSQKTVDEVWKDISKDYG  
NGGGTAAANLPQRQQTLEITLLEFLVRAGVVREDVQLAAKVNANGGFLADLSKTGTY  
SALGMGFQQNRSLGLNNNNTNQISMHSSNLPLNVNGVRSNQAQVQQQQQIFPKQPNLGY  
ATQMPLQSSPGMRGGIMGIGDQGISGGLMQGGALGMVGLGGAVTGSPANQLSSDGITKS

GDTSSVSPVPYVFNGGLRGRRASGAVEKVVERRQRRMIKNRESAARSARKQAYTMELE  
AEVAKLKEENQELLKKQAAMMEMQKNQVMEMMNQQQGVKKRCLRRTQTGPW

> *Manihot\_esculenta*(Manes.18G037900.2.p)

MGTNINFKNFTNDPSADAGGGAGSATRPPGNFPLARQTSIYSLTFDEFQNTMGGIGKDFGS  
MNMDPELLKNIWSAEETQSMVASSGAAQENLQRQGSLLPRTLSTQKTVDEVWKDISKDYG  
NGGGTAAANLPQRQQTGEMTLEEFVLRAGVVREDVQLAAKVNANGGFLADLSKTGT  
SALGMGFQQNRSLGLNNNTNQISMHSSNLPLNVNGVRSNQAQVQQQQQIFPKQPNLGY  
ATQMPLQSSPGMRGGIMGIGDQGSGGLMQGGALGMVGLGGAVTGSPANQLSSDGITKS  
GDTSSVSPVPYVFNGGLRGRRASGAVEKVVERRQRRMIKNRESAARSARKQAYTMELE  
AEVAKLKEENQELLKKQAAMMEMQKNQVMEMMNQQQGVKKRCLRRTQTGPW

> *Citrullus\_lanatus*(Cla022580)

MNFKDFGNDPSAGNGGGGRPPANYPLARQSSIYSLTFDEFQSMGSIGKDFGSMNMDPELL  
KNIWSAEEMQTMASAAVDEKAGSVGRSGGYLQRQGSLLPRTLSTQKKVDEVWKDII  
NEHASAKDGATVASNLQQRQQTGEMTLEEFVLRAGVVREDTQVTANPNNGGFFGNNTG  
FGIGFQRQAKVPENNNHIPIQSSNLPLNVNGVVRTHQPPIPKQPAVTYGSQALPSDGGQLA  
SPGIRGGIMGIGDQGLNTNLMQGSALQGGRMGVVNIAAAPLPIATESPRDQLSSDGIGKSN  
GDTSSVSPVPYALNGGIRGRRSNGIVDKV

VERRQRRMIKNRESAARSARKQAYTMELEAEVAKLKEENQELRQKQAEIMEMQKNRA  
LEVMDKQQGIKKRCLRRTQTGPWCRVAYVSRRLACRVSYNVFASKWIIKSSVAFEWKQN  
T

> *Sesamum\_indicum*(XP\_011074426.1)

MGSNINFKNFGSEPPAEAGGGGRLPGNFPLTRQPSIYSLTFEEFQSTVGGSGKDFGSMNMD  
ELLKSISAEENQNVGSTSGGGCQEGSGYLQKQGSLLPRTLSTQKTVDEVWRDISKEYGGG  
KDATGSISGFGVPQRQQTGELITLLEEFVLRAGVVKEETQLAAKAKNVGFFGDLSRPVNGS  
MLEFGYQQQQPARGTAGLMGGRITSSNQIALQSATLPLNVNGARSATQQLGSSQQQLSQP  
QQQPLLPKQPTLAYGIPRSSQLGSPGIRSGIIGISDPAINDSMVQNVTLQGGGVGMVGLGA  
NGVTVTGSPAASSDGLTKSNGDTSSVSPVPYVFNGCLRGRKSAALEKVVERRQRRMIKN  
RESAARSARKQAYTMELEAEVAKLKEENEELRKKQAEIMEMQKNQVQEMMNQQNGN  
KRRCLRRTQTGPW

> *Sesamum\_indicum*(XP\_011074427.1)

MGSNINFKNFGSEPPAEAGGGGRLPGNFPLTRQPSIYSLTFEEFQSTVGGSGKDFGSMNMD  
ELLKSIWSAEENQNVGSTSGGGCQEGSGYLQKQGSLLPRTLSTQKTVDEVWRDISKEYGG  
GKDATGSISGFGVPQRQQTGELITLLEEFVLRAGVVKEETQLAAKAKNVGFFGDLSRPVNG  
SMLEFGYQQQQPARGTAGLMGGRITSSNQIALQSATLPLNVNGARSATQQLGSSQQQLSQ  
PQQQPLLPKQPTLAYGIPRSSQLGSPGIRSGIIGISDPAINDSMVQNVTLQGGGVGMVGLGA  
NGVTVTGSPAASSDGLTKSNGDTSSVSPVPYVFNGCLRGRKSAALEKVVERRQRRMIKN  
RESAARSARKQAYTMELEAEVAKLKEENEELRKKQAEIMEMQKNQVQEMMNQQNGN  
KRRCLRRTQTGPW

> *Salix\_purpurea*(SapurV1A.0167s0060.3.p)

MGSDFNFKNFSNDPSDACGGRPPGNFPLTRQSSIYSLTFDELQNAMGGSLGKDFGSMNMD  
ELLKNIWSAEESQTMAAATSSGVQESGGLQRQGSLLPRTLSTQRTVDEVWKDMSKEYVIN  
GTSAGAANNVPQRQPTLGEITLEDVLRAGVVREDIQEAARVNTNGGFLGDLSRSANNSL  
AIGFQQNRGVGLNNDNTNQISLQSSNLPLNVNGVRSNQPQVQQQQQIFPNQPNIGYVTHM  
PLQNGPGIRGGLLEIGDQIDGGLMQGGGMGVVGLGGIATGSPANQLSSDGIGKSNGDTS

SVSPVPYVFRESVRGRRAGGAVEKVVERRQRRMIKNRESAARSRARKQAYTMELEAEVA  
KLKEENEELRKKQAEMMEMQKNQVAEMMNTQQGGKKRCLRRTQTGPW

> *Salix\_purpurea*(SapurV1A.0167s0060.2.p)

MGSDFNFKNFSNDPSDACGGRPPGNFPLTRQSSIYSLTFDELQNAMGGSLGKDFGSMNMD  
ELLKNIWSAEESQTMAAATSSGVQESGGLQRQGS�TLPTLSQRTVDEVWKDMSKEYVIN  
GTSAGAANNVPQRQPTLGEITLEDFLVRAGVVREDIQEAARVNTNNGGFLGDLRSANNSL  
AIGFQQNRGVGLNNDNTNQISLQSSNLPLNVNGVRSNQPVQQQQQIFPNQPNIGYVTHM  
PLQNGPGIRGGLLEIGDQGIDGGLMQGGGMGVVGLGGIATGSPANQLSSDGIGKSNGDTS  
SVSPVPYVFRESVRGRRAGGAVEKVVERRQRRMIKNRESAARSRARKQAYTMELEAEVA  
KLKEENEELRKKQAEMMEMQKNQVAEMMNTQQGGKKRCLRRTQTGPW

> *Nicotiana\_sylvestris*(XP\_009795221.1)

MGSNLNIKNYGNPEPPGESGGAGVPLVRQSSVYSLTFDEFLRGSGKDFGSMNMDELLK  
NIWSAEESQNMGTSGVGGQEVGVPGGNLQRQGS�TLPTLSQKTVDEVWRDMSKEYCS  
GKDGNGDVGLSNM  
PRRQQTŁGEMTLEDFLVRAGVVREDAQLAAKASNVGVFGDMSHAGHSLGVGFGYQQSN  
GNTAMVASRNIDNNSGIGVQSGNLPLNVNGIISVQQQQGTMLQQQPQQQQQQQQQPLF  
PKQPLAYGAPMAIPTSGQLGSPGMRGGIVGISDPALGSSLVQTAALTGGGMNMVGFAG  
GVTGATGSPAVSS

DGLGKSNGDTSSISVPYVFSGGLRGRKGGAVEKVVERRQRRMIKNRESAARSRARKQA  
YTMELEAEVAKLKEENEELRKKQAEMMEMQKNRVQEMMNLQRGAKRRCLRRTQTGPW

> *Cucumis\_melo*(MELO3C010850P1)

MNFKDFGNDPSAGNGGGGGRPPANYPLARQSSIYSLTFDEFQSMGSIGKDFGSMNMDELL  
KNIWSAEEMQTMASAAAVGKEGGGSAGGSSGYLQRQGS�TLPTLSQKKVDEVWKDII  
NEHASAKDGATVAPNLQQRQQTŁGEVTLEEFLFRAGVVREDTQVTANPNNGGFFGNNTG  
FGIAFQRQAKVPENNNHIQIQSSNLNANGVRAHQPPQIFPKQATŁTYGSQŁALPSDGQL  
ASPGIRGGIMGIADQGLNTNLMQGSALQGGRMGVVNIAAAPŁPIATESPGNQLSSDGIGKS  
NGDTSSVSPPYALNGGIRGRRGNGIVDKVVERRQRRMIKNRESAARSRARKQAYTMEL  
EAEVAKLKEENQELRQKQAEIMEMQKNRALEVMDKQQGIKKQCLRRTQTGPW

> *Cucumis\_sativus*(Cucsa.396070.1)

MNFKDFGNDPSGGNGGGGGRPPANYPLARQSSIYSMTFDEFQSMGSIGKDFGSMNMDEL  
LKNIWSAEEMQTMASAAAVGKEGGGSAGGSSGYLQRQGS�TLPTLSQKKVDEVWKDI  
INEHASAKDGAT

LAPNLQQRQQTŁGEVTLEEFLFRAGVVREDTQVTANPNNGGFFGNNTGFGIAFQRQPKVP  
ENNNHIQIQSSNLNANGVRAHQPPQIFPKQATŁTYGSQŁTLPSDAQŁASPGIRGGIMGIA  
DQGLNTNLMQGTALQGGRMGVVNIAAAPŁPIATESPGNQLSSDGIGKSNGDTSSVSPPY  
ALNGGIRGRRGNGIVDKVVERRQRRMIKNRESAARSRARKQAYTMELEAEVAKLKEENQ  
ELRQKQAEIMEMQKNRALEVMDKQQGIKKRCLRRTQTGPW

> *Manihot\_esculenta*(Manes.18G037900.3.p)

MGTNINFKNFTNDPSADAGGAGSATRPPGNFPLARQTSIYSLTFDEFQNTMGIGKDFGS  
MNMDELLKNIWSAEETQSMVASSGAAQENLQRQGS�TLPTLSQKTVDEVWKDISKDYG  
NGGGTAAANLPQRQQTŁGEMTLEEFLVRAGVVREDVQLAAKVNANGGFLADLSKTGTY  
SALGMGFQQNRSLGLNNNNTNQISMHSSNLPLNVNGVRSNQAQVQQQQQIFPKQPNŁGY  
ATQMPLQSSPGMRGGIMGIGDQGISGGLMQGGALGMVGLGGAVTGSPANQLSSDGITKS  
GDTSSVSPPYVFNGGLRGRRASGAVEKVVERRQRRMIKNRESAARSRARKQAYTMELE

AEVAKLKEENQELLKKQVMEMMNQQQGKVRCLRRRTQTGPW

> *Populus\_euphratica*(CCG027764.1)

MGTNFNFKNFSNDPSDAVGGPPGNSPLTRQSSIYSLTFDELQNTMGGSLGKDFGSMNMD  
ELLKNIWSAEETQTIATATSTGVQEGGALQRQGSITLPTLSQRTVDEVWKDMSKEYVIN  
GTSAGAANNVPQRQPTLGGMTLEEFLLRAGVAIEDIQVAPKVNTNGGLLGDLRSANNSL  
AIGFQQNRGVGLDNDNTNQISLQSSNLPLNVNGVRSNQAQVQQQQQQIFPKQPNMGYVT  
QPNNDSTNQISLQSSNLPLNVNGVRSNQAQVQQQQQQIFPKQPNLGYVTQMPLQSGPGIRGG  
MLGIGDQGMDSGLMQGGGMGVVGLGGIATGSPANQLSSDGIGKSNGDTSSVSPVPYVFR  
ESVRGRRAGGAVEKVVERRQRRMIKNRESAARSARKQAYTMELEAEVAKLKEENEELR  
KKQAEMMEIQKNQVAEMMNMQQGKVRCLRRRTQTGPW

> *Lactuca\_sativa*(Lsa004053)

MNFKNLGNQTAEVGNRPPGGFHLARQGSYSLTFDELQNTMGGSIGKDFGPLNMDLL  
KSIWNAEEVQTTGTNIGVQEPTGDGGANIQRQGSITLPTLSQKTVDEVWKDISKEFSFGF  
QPNLPQRQQTLGEMTLEEFVLKAGVVREEPPQLPSKQNDNGLFPNLTPQNNSGFGAIGF  
QQAPARNNNQIAFQPANLPLNVNGVRSNPQQQLFPKQPKLSYGAPMAAIPPSKQMGRNGI  
VGLSDPAMNGNLVSNMGMAMVAVGSPAVSSDGIGKTNGDTSSVSPVPYEFSGAMRGRK  
SGAVEKVVERRQRRMIKNRESAARSARKQAYTMELEAEVSKLKEQNQELKRKAEMME  
MQQNQQVMEMMNTQPEAKRRYIRRTQSGPW

> *Nicotiana\_sylvestris*(XP\_009793574.1)

MGSNFNFKNFGNEPPGEGSSVGGKQPGNFQLPRQPSYSLTFDEFLSTTGGSGKDFGSMN  
MDELLKNIWNAEESQTMGGSGINGQEVGSVQSGNLQRQGSITLPTLSHKTVDEVWKD  
MSKEYGGGKDGNSIGVSATLPQRQQTLGEITLEEFVLVAGVVREDAQLAAKSNVGGIFA  
DLSYAGNNTGVGFGYQQANRNTGETGIQAANLPLNVNGVRTQQQLRAQQQLQQQQPQPQ  
QQQPQQQLFPKQPALAYAAPMAIPNNGQLGSPGMRGGLVGISDPALNSNFVQGAALTGG  
GMGMVGLGAGAVTVATASPAVSSDGLGKSSGDTSPVSPLPYVFNGGIRGRKYSTVEKVVE  
RRQRRMIKNRESAARSARKQAYTMELEAEVAKLKEENEELQKKQEEMLEMQKNQVME  
MMNLQREAKRRCLRRRTQTGPW

> *Populus\_trichocarpa*(Potri.002G125400.1)

MGTNFNFKNFPNDPSDAVGCRPPGNSPLTRQSSIYSLTFDELQNTMGGSLGKDFGSMNMD  
ELLKNIWSAEETQTMATATSTVVEEGGGLQRQGSITLPTLSQRTVDEVWKDMSKEYVIN  
GTSAGAANNVPQRQPTLGGMTLEEFLLRAGVAREDTQVAPKVNTNGGFFGDLRSANNS  
LAIGFQQNRGVGLNNDNTNQISLQSSNLPLNVNGVRSNQAQVQQQQQQIFPKQPNMGYVT  
QPNNDNTNQISLQSSNLPLNVN  
GVRSNQAQVQQQQQQQIFPKQPNMGYVTQMPLQSGPGIRGGMLGIGDQGIDSGLMQGG  
GMGVVGLGGIATGSPANQLSSDGIGKSNGDTSSVSPVPYVFRESVRGRRPGGAVEKVVER  
RQRRMIKNRESAARSARKQAYTMELEAEVAKLKEENEELRKKQAEMMEIQKNQVAEM  
MNMQQGGKVRCLRRRTQTGPW

> *Glycine\_max*(Glyma.04G039300.1.p)

MNFKSFGNEAGGGGGRQAGNFSLTRQPSVYSLTFDEFMNSMGGSGKDFGSMNMDELLK  
NIWTAEEVQTMASAGVAADDGGAGVSHLQRQGSITLPTLSQKTVDEVWKDISKDHGGP  
NLAQTQREPTLGEVTLEEFVLVAGVVREDAKPNESVFDLSRVGNNSGLGLGFQQRNKV  
AAATGLMGNRLNNDPLVGLQPSANLPLNVNGVRTSNQQPQMOSPQSQHQHQHQHQHQ  
QQIFPKQSAMSAAAQMPQGMVRGGVVGLGDQGLSVQGGGIGMVGLAPGSVHVATGSP  
AANQLSSGDRIGKSNGDSSSVSPVPYVFNGSLRGRKNGGAVEKVIERRQRRMIKNRESAA

RSRARKQAYTMELEAEVAKLKEENQELQKKQAEIMEIQKNQVKEMMNLRQREVKRRRLR  
RTQTGPW

> Glycine\_max(Glyma.04G039300.3.p)

MNFKSFGNEAGGGGGRQAGNFSLTRQPSVYSLTFDEFMNSMGGSGKDFGSMNMDELLK  
NIWTAEVQTMASAGVAADDGGAGVSHLQRQGSLLPRTLSTQKTVDEVWKDISKDHGGP  
NLAQTQREPTLGEVTLLEEFVLRAGVVREDAKPNEVFVDLSRVGNNSGLGLGFQQRNKV  
AAATGLMGNRLNNDPLVGLQPSANLPLNVNGVVRTSNQQPQMSPQSQHQHQHQHQHQ  
QQIFPKQSAMSAAAAQMPQGMVRRGGVGLGDQGLSVQGGGIGMVGLAPGSVHVATGSP  
AANQLSSGDRIGKSNGDSSSVSPVPYVFNGSLRGRKNGGAVEKVIERRQRRMIKNRESAA  
RSRARKQAYTMELEAEVAKLKEENQELQKKQAEIMEIQKNQVKEMMNLRQREVKRRRLR  
RTQTGPW

> Actinidia\_chinensis(Achn026271)

MNFRNFGNEPSAELVAGGGGRSPGIFPLARQSSVYSLTFDEFQSTIGGSGKDFGSMNMDEL  
LKNIWSAEETQTVGSTSIGQEGVAPGGYLQKQGSLLPRTLSTQKTVDEVWRDLAKESSGG  
TDRNSAGGTNLPQAQRQRTLGEMLTLEEFVLRAGVVREDVQLPMKPNNSGFFGDLMSG  
NNNGVGIGFQQMGRNTGLAGNRIPDVNNQTAMQSANLPLNVNGVRSSQQQLFMPQQQQ  
QQQQQQQQQLFPKQPTLAYANPMAIPSSQTLNSQVIRGGIVGITDQSMNGNLVQSGALQGG  
GMGMIGFGAGAVTVATGSPASDGLARSNGDTSSSVSPVPYVFNGGLRGRKGNNPVEKVVE  
RRQRRMIKNRESAARSARKQAYTTELEVEIAKL  
KEENEVLRRKQEEILETRKNQLEPFNTWETGYADGIGDDEQAAGSKETMPEANANWPMV  
KGVIDSIVET

> Solanum\_pennellii(Sopen04g032440.1)

MGSNYHFKNFGNEPPGEGGSGGGGKQPGNFGLPRQPSIYSLTFDEFLSSTGGSGKDFGSM  
NMDELLKNIWNAEENQTIGGPGINGQEVGPVGGHLQRQGSLLPRTLSTQKTVDEVWRDM  
SKEHGGGKDGNSVGVPNPQTQRQQNLGEITLLEEFVLRAGVVREDAQFAAKSNNAGGIF  
GDLSYAGNNTGLAFGYQQANSRNTGLMPGSIPNKNGETVIQSANLPLNVNGVRSTQQQL  
RPQQQLQQNQSQSQPQQQPIFPKQ  
PALPYGAPMAIPNSGQLSSPGMRAGMVGIPDPALNSNFIQGASLMGGGMNMVGLGASGV  
TVATASPGVSSSDGLGKSNGDTPSVSPVPYVFNGGLRGRKYSTVEKVVERRQRRMIKNRE  
SAARSARKQAYTMELEAEVAKLKEENDELQKKQEEMLEMQKNQVMEMMNLRQKGA  
RRCLRRTQTGPW

> Solanum\_pimpinellifolium(Sopim04g078840.0.1)

MGSNYHFKNFGNEPPGEGGSGGGGKQPGNFGLPRQPSIYSLTFDEFLSSTGGSGKDFGSM  
NMDELLKNIWNAEENQTIGGPGINGQEVGPVGGHLQRQGSLLPRTLSTQKTVDEVWRDM  
SKEHGGGKDGNSVGVPNPQTQRQQNLGEITLLEEFVLRAGVVREDAQFAAKSNNAGGIF  
GDLSYAGNNTGLAFGYHQANSRNTGLMAGSIPNKNGETVIQSANLPLNVNGVRSTQQQL  
RPQQQLQQNQSQSQPQQQPIFPKQPALPYGAPMAIPNSGQLGSPGMRAGMVGIPDPALNSNFI  
QGASLMGGGMNMVGLGASGVTVATASPGVSSSDGLGKSNGDTPSVSPVPYVFNGGLRG  
RKYSTVEKVVERRQRRMIKNRESAARSARKQAYTMELEAEVAKLKEENDELQKKQEE  
MLEMQKNQVIEMMNLRQKGAARRCLRRTQTGPW

> Solanum\_lycopersicum(Solyc04g078840.2.1)

MGSNYHFKNFGNEPPGEGGSGGGGKQPGNFGLPRQPSIYSLTFDEFLSSTGGSGKDFGSM  
NMDELLKNIWNAEENQTIGGPGINGQEVGPVGGHLQRQGSLLPRTLSTQKTVDEVWRDM  
SKEHGGGKDGNSVGVPNPQTQRQQNLGEITLLEEFVLRAGVVREDAQFAAKSNNAGGIF



GDLSYAGNNTGLAFGYHQANSRNTGLMAGSIPNKNGETVIQSANLPLNVNGVRSTQQQL  
RPQQQLQQNQSQPQQQPIFPKQPALPYGAPMAIPNSGQLGSPGMRAGMVGIPDPALNSNFI  
QGASLMGGGMNMVGLGASGVTVATASPGVSSSDGLGKSNGDTPSVSPVPYVFNGGLRG  
RKYSTVEKVVERRQRRMIKNRESAARSARKQAYTMELEAEVAKLKEENDELQKKQEE  
MLEMQKNQVIEMMNLQKGAKRRCLRRTQTGPW

> *Eucalyptus\_camaldulensis*(EcC009711.80)

MGSNINFKNFGTDPTPTNNRPPGNTLLTRQPSVYTLTFEEFQNSIGKDFGSMNMDELKNI  
WSAEENQSMASASGPGGGGGQDGIGVPGGHLQRQGSLLPRTLSTQKTVDEVWKNISKED  
SVGKDGGLVTGGPVVPQRQQTGEMTLEEFVFRAGVVREDAQYSGKPNGGGLFGELPRA  
GNNAGLEFGFPQPGKAENLMGMRNLEVGNLNSMHPLNMPVNNANANGIRSNQQQVTQP  
QAHQPQILPKQPILPFSQQIPSPNNTQLNGHGFGRGGLMAIPDQVMTNNLVQGGALHGGGM  
GMVGLGAGPAGMPTGSPANPVSSDGMGRSNGDTSSVSPVPYVFNGSVRGRKSNSAVEKV  
VERRQRRMIKNRESAARSARKQAYTMELEAEVAKLKDENEELRKKQAEIMEIQKNQVI  
EMMNTQRGAKKRCLRRTQTGPW

> *Citrus\_clementina*(Ciclev10001159m)

MGSNINFKNFSNEPPNDVGKPPGNIPLTRQSSVYSLTFEEFQNTVGGMGKDFGSMNMDEL  
LKNIWSAEETQNMVASSSGNQPDCTNGLQRQGSLLPRTLSTQKTVDEVWKDISKEYSLKD  
GIAGSGVGQGPNNMPQAQRQQTGEMTLEEFVFRAGVVREDLQFGGGVGGKVNNGNS  
GLFGDLRSANNTGMGIGFQQMGKGASLMGNRNLETGNQINIQSSNLPLNVNGARMNQ  
HPLARQQHNQQTQQQPQQPQIFPKQPAMAYATQMPLQSSPGIKSGIVGVGDQAMNGNLIH  
GGALQGGGMGMVGLGAPPVGVSSGSPANQLSSDGIGKSNGDTSSVSPVPYMFNGSLRGR  
RFNGNVEKVVERRQRRMIKNRESAARSARKQAYTMELEAEVAKLKEENEELRKKQDE  
MMEMQKNQVLEMMNMQQGGKRRCLRRTQTGPW

> *Phaseolus\_vulgaris*(Phvul.009G065500.2)

MNFKSFGNEAGGDGGGRPPGNFSLTRQSSVYSLTFDEFMNTMGGSGKDFGSMNMDELLK  
NIWTAEVQTMASAGVAADDGGAGISHLQRQGSLLPRTLSTQKTVDEVWKDISKDYGGH  
GEPNLAQTPRQPTLREMTLEEFVFRAGVVREDAKPNDGVFMDLARAGNNNGLGFEFQQ  
MNKVAAATGLMGNRLNNDPLVGLQSSANLPLNVNGVRSSSQPQMSPQSQQQHQQQ  
IFPKQSAMSYAVAQMPQGMVRGGIVGLGGDQGLSVQGGGIGMVGLAPGSVHVATGSPAA  
NQLSGDKMAKSNGDTSSVSPVPYVFNGGMRGRKSGGAVEKVIERRQRRMIKNRESAARS  
RARKQAYTMELEAEVAKLKEENQELQKKQAEIMEIQKNQVKEMMNLQREVKRRRLRRT  
QTGPW

> *Phaseolus\_vulgaris*(Phvul.009G065500.1)

MNFKSFGNEAGGDGGGRPPGNFSLTRQSSVYSLTFDEFMNTMGGSGKDFGSMNMDELLK  
NIWTAEVQTMASAGVAADDGGAGISHLQRQGSLLPRTLSTQKTVDEVWKDISKDYGGH  
GEPNLAQTPRQPTLREMTLEEFVFRAGVVREDAKPNDGVFMDLARAGNNNGLGFEFQQ  
MNKVAAATGLMGNRLNNDPLVGLQSSANLPLNVNGVRSSSQPQMSPQSQQQHQQQ  
IFPKQSAMSYAVAQMPQGMVRGGIVGLGGDQGLSVQGGGIGMVGLAPGSVHVATGSPAA  
NQLSGDKMAKSNGDTSSVSPVPYVFNGGMRGRKSGGAVEKVIERRQRRMIKNRESAARS  
RARKQAYTMELEAEVAKLKEENQELQKKQAEIMEIQKNQVKEMMNLQREVKRRRLRRT  
QTGPW

> *Glycine\_max*(Glyma.04G039300.4.p)

MNFKSFGNEAGGGGGRQAGNFSLTRQPSVYSLTFDEFMNSMGGSGKDFGSMNMDELLK  
NIWTAEVQTMASAGVAADDGGAGVSHLQRQGSLLPRTLSTQKTVDEVWKDISKDHGGP

NLAQTQREPTLGEVTLEEFVLRAGVVREDAKPNESVFVDLSRVGNNSGLGLGFQQRNKV  
AAATGLMGNRLNNDPLVGLQPSANLPLNVNGVRTSNQQPQMOSPQSQHQHQHQHQHQ  
QQIFPKQSAMSAAAAQMPQGMVRGGVVGLGDQGLSVQGGGIGMVGLAPGSVHVATGSP  
AANQLSSGDRIGKSNGDSSSVSPVPYVFNGSLRGRKNGGAVEKVIERRQRRMIKNRESAA  
RSRARKQAYTMELEAEVAKLKEENQELQKKQVKEMMNLQREVKRRRLRRTQTGPW

> Glycine\_max(Glyma.04G039300.2.p)

MNFKSFGNEAGGGGGRQAGNFSLTRQPSVYSLTFDEFMNSMGGSGKDFGSMNMDELLK  
NIWTAEEVQTMASAGVAADDGGAGVSHLQRQGSITLPRITLSQKTVDEVWKDISKDHGGP  
NLAQTQREPTLGEVTLEEFVLRAGVVREDAKPNESVFVDLSRVGNNSGLGLGFQQRNKV  
AAATGLMGNRLNNDPLVGLQPSANLPLNVNGVRTSNQQPQMOSPQSQHQHQHQHQHQ  
QQIFPKQSAMSAAAAQMPQGMVRGGVVGLGDQGLSVQGGGIGMVGLAPGSVHVATGSP  
AANQLSSGDRIGKSNGDSSSVSPVPYVFNGSLRGRKNGGAVEKVIERRQRRMIKNRESAA  
RSRARKQAYTMELEAEVAKLKEENQELQKKQVKEMMNLQREVKRRRLRRTQTGPW

> Solanum\_pimpinellifolium(Sopim11g044560.0.1)

MGSNYHFKNFGNEPPGEGSGGGGKQPGNFGILPRQPSIYSLTFDEFISSTGGSGKDFGSM  
NMDELLKNIWNAEENQTIGGPINGQEVGVPGGHLQRQGSITLPRITLSHKTDEVWRDM  
SKEHGGGKDGNISVGVPPNIPQTQRQQNLGETLEEFVLRAGVVREDAQFAAKSNNAGGIF  
GDLSYAGNNTGLAFGYHQANSRNTGLMAGSIPNKNGETVIQSANLPLNVNGVVRSTQQQL  
RPQQLQQNQSQPQQQPIFPKQPALPYGAPMAIPNSGQLGSPGMRAGMVGIPDPALNSNFI  
QGASLMGGGMNMVGLGASGVTVATASPGVSSSDGLGKSNGDTPSVSPVPYVFNGGLRG  
RKYSTVEKVVERRQRRMIKNRESAARSARKQAYTMELEAEVAKLKEENDELQKKQEE  
MLEMQKNQVIEMMNLQKGAKRRCLRRTQTGPW

EIN3/EIL1 protein sequence information

>Unigene0036810

KYMLKMMEACKAQQGFVFGIIPKKGKPIIGSSENLRWWEEKVQFERNGPATISKYISENS  
NSAQYESSTHTLIELQDITLRSLLSILMQHCDPPQRKFPLDKGIPPPWWPTGNEEWWAE  
LGIYPGPPPYKKPHDLRKPKWKVIVLTAVIKHMSPNIGKIRKLVLHSLQDKMSAKESAT  
WMAVLGREEALLHPD

>Unigene0036956

MGILEDMGFCSNDFLSAPPGEGEVALEPEQEAAMEEDYSDEEMDVDELERRMWRDRM  
LLRRLKEQNKAKDGVNLIKQRQSSEQARRKKMSRAQDGILKYMLKMMEVCKAQQGFVY  
GIIPEKGKPVSGASDNLRAWWKEKVRFRNGPAAISKYQADHSIPGKNEDCITVAST

>Unigene0036957

EDCITVASTPHTLQELQDITLGSLLSALMQHCEPPQRRFPLEKGVPPPWWPTGNEEWWPQ  
LGLPNDQGPPPYKKPHDLKKAWKVSILTAVIKHMSPDIAKIRKLVRQSKCLQDKMTAKES  
ATWLAIIINQEESSLRKLYPDSCPPASFAAGSGSFVISDVSDYDVEGVDDDPNTEVEECKPRD  
GTIFNLGMGGSKDRFVVPPLAQIKGEIITNSDFIQKRKQPSDEQHIMMEQKTYTCEFPQCP  
YNNYQSGFFDRTSRNNHQMNCOPYRNNSCQGFEMPNFHINNDKAPAFSSSFAQPKPTPRTL  
NQGSPSFHVTGLGLPEDGQKMISDLFSFYDTNLQQTKSLNSGSLNVIEDHTPQQQKFQLQ  
LDDNFYGGQVIMEETNMPLNHSVFPSTEFQFDQCKAYASPFDTNGNDNMADFRFGSPMN  
LGSVDYPIDPMPKHDASAWFL

>Unigene0042138

IGFKVMGFCDDLNFSCGPSGEANQFTPKPEAEVAEDEYSDDDEIDVDELEKRLLRDKMRL  
KRLKELNKGKESVDMVKQRQSEEQARRKKMSRAQDGILKYMFKMMEICKAQQGFV

>Unigene0071273

EWWKDKVRFRNGPAAIAKYQADNLIPGKNESSSAVGPTPHTLQELQDITLGSLLSALM  
QHCDPPQRRFPLEKGVPPPWWPTGNEEWWPQLGLQKDQGPPPYKKPHDLKKAWKVG  
LTAVIKHISPDIAKIRKLVRQSKCLQDKMTAKESATWLAIIINQEEALARELYPDRCPLLSSG  
GSGSFAINDCSEYDVEGAEDEPNFDVQEQKPNLNLNMGMERIKDRLPVQQLTHPIKDE  
VITNLDFTKRKPTNDLNTIMDHKIYTCFLQCPHSELCRGFHDRSSRDNHQLTCPFRSNSS  
EFVLNPFHSNEFKPVVFPFSFAQPKSAVPSVDSIQPSFDLSGLGVPEDGQKMISELMSFYDA  
NIQGNKHSNSVSIPVTKGQTLSQLPQPNVHCQQENNYILGQGAVMEGGGNIFEEANMPV  
NCQMFSQQEDRYDQGKVLNSPFANPNDNFHLMFGSPFNLQSVDYAEGFPGVARDTLAK  
QDVSIWY

>Unigene0071274

MMIMFDEMFGGDLDFFSAPLGEGDSAAPQAEPEAVVDDDYSDDEIDVDELERRMWRD  
KMRLKRLKEMNKGKEGVDAKQRQSSEQARRKKMSRAQDGILKYMLKMMEVCKAQQ  
FVYGIPEKGKPVSGASDNLREWWKDKVRF

>Unigene0071276

MLGETGFCGDLDFSTPVGEKDAVAPQPNPNPTLNNDYSDEDVDIDIDELEKRICNDKMK  
LKRLKEIAKNKENIQNTDNYSKSEEQARRKKMSRAQDGILKYMLKMMEVCNAQGFVYG  
IPEKGKPVGTASDNLREWWKDKVRFRNAPAAIGKYQLDHSMVCKDEGFNPVESTPRT  
LMELQDITLGSLLSALMQHCDPPQRRFPLERGVPPPWWPTGDEFWWAELGLGLGPGLGP  
IPYKKPHDLKKAWKVGVLTVIKHMSPNFAKICKLVRQNKCLQDKMTAKESATWLAVVY  
REKALARELYPNLSIPVSGHQESCVFVISDSSAYDVEGVEDMASFDILEQKPSVDDLMKLD  
FSKKRKQSSEMELCRGFSDRSSIENHQLASAFRSNSSHFGLSDFSENEVKPIIFPFADVSRIG

VPEDGRKSINDLMSFYDSNIQKYTNPVSQCDSGIYIKGQMMGSSFADVASMKMIHTGFPQ  
HDGVYNNQFEANPNENFNFKFGSSLNIPSVVYTDGLSARDSNNFTLSEPDVFTWY

>Unigene0074938

KSRKSPNKKPHDLKKS WKVGVLTAVNKHMSPDIAKIUKLVMRSKCLQDKMAAKESAT  
WLTIIHQEEALVRELYPDRCPLLSSN

>Unigene0000457

MGAFDEMGYCGNFEFLYPPQRVEREEPLGVEPEQEEDSSDEEMNEEEEIEKRIWRDKMRLK  
RLKEEKNKGKVKDENALETSKQRHSQEQARRKKMSRAQDGILKYMLKMMEVCKAQQF  
VYGIPEKGKPVSGASDNLRAWWKDKVRFDRNAPAAILKYQYEHSLGRNEDFGHVGPPT  
HTLHELQD TTLSLLSALMQHCNPPQRRFPLEKGVAPPWWPTGEEGGPPYKKPHDLKKA  
WKVSVLTAVIKHMSPDIGKIRKLVRQSKCLQDKMTAKESATWLAIIQGEEAEIRKLYPERSP  
PLAFSGSGSYVISDSSDYDVEGLDDVANIDVGDLKPKSNLGNDFPMGSNPIKGEIIEISSDIA  
QKRKLPGNEHDTLMMDQKIYTCEYPKCPFTNPQVGFLDRISRNHQMCPFQVNTNTNI  
SQGFEITNFQDNNEKSPAVYSIPSFAIPKSAPPPLNHGLTNHGFGLPHFTGLQEHTQKGLNV  
PGQQAQFIYDSPYERNNIREQNMVLNDSMVASNEFQIDLCKAYASSAFDSIGNENVGSPFN  
FG

> Arabidopsis thaliana (AT3G20770.1)

MMFNEMGMCGNMDFFSSGSLGEVDFCPVQAEPDSIVEDDYTDDEIDVDELERRMWRD  
KMRLKRLKEQDKGKEGVDAAKQRQSQEQARRKKMSRAQDGILKYMLKMMEVCKAQQ  
FVYGIIPENGKPVGTGASDNLREWWKDKVRFDRNGPAAITKYQAENNIPGIHEGNNPIGPTP  
HTLQELQD TTLSLLSALMQHCDPPQRRFPLEKGVPPPWWPNGKEDWWPQLGLPKDQG  
PAPYKKPHDLKKA WKVGVLTAVIKHMFDPDIKIRKLVRQSKCLQDKMTAKESATWLAII  
QEE SLARELYPESCPPLSLSGGSCSLLMNDCSQYDVEGFEEKESHYEVEELKPEKVMNSSNF  
GMVAKMHD FVPKKEVPAGNSEFMRKRKPNRDLNTIMDRTVFTCENLGCAHSEISRGFLD  
RNSRDNHQLACPHRDSRLPYGAAPSRFHVNEVKPVVGFPQPRPVNSVAQPIDLTGIVPEDG  
QKMISELMSMYDRNVQSNQTSVMENQSVSLLQPTVHNHQEHLQFPGNMVEGSFFEDL  
NIPNRANNNNSSNNQTFQGNNNNNNVFKFDTADHNNFEAAHNNNNNNSSGNRFQLVFDS  
TPFDMASFDRDDMSMPGVVGTMDGMQKQKQDVSIF

> Nicotiana tabacum (XP\_016477306.1)

MMMFEE MGFPGNFEFMSDPLGCGGDVAQEVEHKPTGVEENYSDEEMDVDELERRMWR  
YRMLWRLKEKNKNKEVGGDGAKQRQSQEQARRKKMSRAQDGILKYMLKMMEVCNA  
QGFVYGIPEKGKPVGTGASDNLRAWWKEKVRFDNRNGPAAIAKYQADNQIPGRIEDSSVIVS  
TPHTLQELQD TTLSLLSALMQHCDPPQRRFPLEKGVAPPWWPSGKEEWWGQLGLPNDQ  
VPPPYKKPHDLKKA WKVGVLTAVIKHISPDIKIRKLVRQSKCLQDKMTAKESATWLAII  
QEEALARKLYPDSCPQGS LAVGNGSYFISDTSYDVEGVDDERNNEVECKPHDINLLTGI  
MVPKERILMPALAPVKGEIIDLTSDFIQKRKHPSFEESVDQKLYTCEYLHCPYSNYQAGFL  
DRTSRNHQMDCPFRFNSAQR LGMPPKYQINNENNTVFPTQTATPKPATSSVTASSSMTVS  
GLGLPEDGQRMISDLFTFYDNNLQQNSSICSGNSKILANQNMQQNQTVELPMDDNFNLG  
HMEAEAQETSMTMNSAYTSTEFQYDQCKLPFDAPFTGNLNDITDYRFGSPFNMGGSDYS  
MDQLTKQDISTWYL

> Nicotiana tabacum (XP\_016509274.1)

MMMFEE MGFPGNFEFMSDPLGCGGDVAQEIHKPTGVEEEDYSDEEMDVDELERRMWR  
DRMLLRRLKEKNKNKEVGGDGAKQRQSQEQARRKKMSRAQDGILKYMLKMMEVCNA  
QGFVYGIPEKGKPVGTGASDNLRAWWKEKVRFDNRNGPAAIAKYQADNQIPGRVEDSSVIV

STPHTLQELQD TT LGSLLSALMQHCDPPQRRFPLEKGVAPPWWPSGKEEWWGQLGLPND  
QVPPPYKKPHDLKKAWKVGVLTA VIKHISPDIAKIRKLVRQSKCLQDKMTAKESATWLAIH  
NQEEALARKLYPDSYQQGSLAVCNGSYFISDTS DYDVESVDDERNNEVECKPHDINLLTGI  
MVPKDRILMPALPPVKGEIIDLTSDFIQKRKQPSFEESVDQKMYTCEYLHCPYSSYQAGFL  
DRTSRNNHQMNC PFRFNSAQRLGMPPKYQINNENNTVFPAQTASPKPAASSVTASSSMTV  
SGLGLPEDGQRMISDLFTFYDNNLQQNSSICSGNSKILT NQNMQQNQTVELPMDDNFNLG  
HLEAEAQETSMTMNSAYPLTDFQYDQRKLPFDTPFAGNLNDITDYRFGSPFNMGGSDYSI  
DQLTKQDISTWYL

> *Nicotiana tabacum* (XP\_016495343.1)

MMMFEEMGFCGDLDFFPAPLKEVEVAAPHTELDGEPAMDDDYSDEDIDVDELEKRVWR  
DKMKLKRMEKNQ GKEDIDSAKRRQSSEQARRKKMSRAQDGILKYMLKMMEVCKAQ  
GFVYGIPEKGKPVGGASDNLREWWKDKVRFD RNGPAAIAKYQADHATPGMNEGSNPV  
GPTPHTLQELQD TT LGSLLSALMQHCDPPQRRFPLEKGVSPWWPTGEEDWWPQLGLQ  
KEQGPPPYKKPHDLKKAWKVGVLTA VIKHMFDPDIKIRKLVRQSKCLQDKMTAKESATW  
LAISQEEALARELYPDRCPPLSSAGASGTFMSNDSSEYDVEGVQEEP NFDVHEQKPNHLS  
LLNVSLERLKETLPLQQSHPNKDEMITGLDFTRKRKQSG EQVTVM DQKIYTCEFLQCPY  
SELCHGFQDRSARDNHQLACPFRKTSQLGISNFHVNEVKPTVFPQQYVQS KSAALSVNPG  
PGPPSFDLFGVGPEDGQRMIDELMSFYDSKIHGNKSQNTGNVALTKEQP HQQPRLNQDN  
YLHSQGMERNIFKDTNISASHPILPQGNLADQCKVLNSS FDTGSSDNFN FMFGSPFNLQ  
STNYTGSLPGIGCDNTPKQD IPIWY

> *Nicotiana tabacum* (XP\_016495344.1)

|             |            |            |             |             |
|-------------|------------|------------|-------------|-------------|
| MMMFEEMGFC  | GDLDFFPAPL | KEVEVAAPHT | ELDGEPAMDD  | DYSDEDIDVD  |
| ELEKRVWRDK  | MKLKRMEKN  | QGKEDIDSAK | RRQSSEQARR  | KKMSRAQDGI  |
| LKYMLKMMEV  | CKAQGFVYGI | IPEKGKPVGG | ASDNLREWWK  | DKVRFD RNGP |
| AAIAKYQADH  | ATPGMNEGSN | PVGPTPHTLQ | ELQD TT LGS | LSALMQHCDP  |
| PQRRFPLEKG  | VSPWWPTGE  | EDWWPQLGLQ | KEQGPPPYKK  | PHDLKKAWKV  |
| GVLTA VIKHM | FPDIKIRKL  | VRQSKCLQDK | MTAKESATWL  | AIISQEEALA  |
| RELYPDRCPP  | LSSAGASGTF | MSNDSSEYDV | EGVQEEP NFD | VHEQKPNHLS  |
| LLNVSLERLK  | ETLPLQQSH  | PNKDEMITGL | DFTRKRKQSG  | EQVTVM DQKI |
| YTCEFLQCPY  | SELCHGFQDR | SARDNHQLAC | PFRKTSQLGI  | SNFHVNEVKP  |
| TVFPQQYVQS  | KSAALSVNPG | PGPPSFDLFG | VGVPEDGQRM  | IDELMSFYDS  |
| KIHGNKSQNT  | GNVALTKEQP | HQQPRLNQDN | YLHSQGMER   | NIFKDTNISA  |
| SHPILPQGNL  | ADQCKVLNSS | FDTGSSDNFN | FMFGSPFNLQ  | STNYTGSLPG  |
| IGCDNTPKQD  | IPIWY      |            |             |             |

> *Nicotiana tabacum* (XP\_016444768.1)

|             |            |            |             |             |
|-------------|------------|------------|-------------|-------------|
| MMMFEEMGFC  | GDLDFFPAPL | KEVEVAAPHT | ELDGEPAMDD  | DYSDEDIDVD  |
| ELEKRVWRDK  | MKLKRMEKN  | QGKEDIDSAK | RRQSSEQARR  | KKMSRAQDGI  |
| LKYMLKMMEV  | CKAQGFVYGI | IPEKGKPVGG | ASDNLREWWK  | DKVRFD RNGP |
| AAIAKYQADH  | ATPGMNEGSN | PVGPTPHTLQ | ELQD TT LGS | LSALMQHCDP  |
| PQRRFPLEKG  | VSPWWPTGE  | EDWWPQLGLQ | KEQGPPPYKK  | PHDLKKAWKV  |
| GVLTA VIKHM | FPDIKIRKL  | VRQSKCLQDK | MTAKESATWL  | AIISQEEALA  |
| RELYPDRCPP  | LSSAGASGTF | MSNDSSEYDV | EGVQEEP NFD | VHEQKPNHLS  |
| LLNVSLERLK  | ETLPLQQSH  | PNKDEMITGL | DFTRKRKQSG  | EQVTVM DQKI |
| YTCEFLQCPY  | SELCHGFQDR | SARDNHQLAC | PFRKTSQLGI  | SNFHVNEVKP  |

TVFPQQYVQS KSAALSVNPG PGPPSFDLFG VGVPEdGQRM IDELMSFYDS  
KIHGNKSQNT GNVALTKEQP HQQPRLNQDN YLHSQGMMER NIFKDTNISA  
SHPILPQGNL ADQCKVLNSS FDTGSSDNFN FMFGSPFNLQ STNYTGSLPG  
IGCDNTPKQD IPIWY

> *Nicotiana tabacum* (XP\_016444767.1)

MMMFEEMGFC GDLDFFPAPL KEVEVAAPHT EPEPELVVDD DYSDEEIDMD  
ELERRMWRDK MKLKRLKEMT KSKEGVDPK HRQSSEQARR KKMSRAQDGI  
LKYMLKMMEV CKAQGFVYGI IPEKGKPVGG ASDNLREWWK DKVRFDRNGP  
AAIAKYQADH AIPGMNEGSN PVGPTPHTLQ ELQDTTLGSL LSALMQHCDP  
PQRRFPLEKG VSPPWWPTGQ EDWWPQLGLQ KEQGPPPYKK PHDLKKAWKV  
GVLTAIVIKH FPDIAKIRKL VRQSKCLQDK MTAKESATWL AIISQEEALA  
RELYPDRCPLSSAGASGTF ILDDSSSEYDV EGAQDEPNFD VHEQKPNHLS LLNIGVERFK  
ETLPLQQQSH PNKDEFITNL DFTRKRKQAN ELTVMMDQKI YTCEFQQCPH  
SELRNGFQGK SARDNHQFAC PFRNSSQFGV SNFNFNEVKP VVFPQQYVQP  
KSASLPVNQG PPTFDLSGVG VPEDGQRMIT ELMSFYDSNI QGNKSQNTGN  
VALTKEQPHQ QPRVNQDNYL HSQGIMEGNI FKDANISTSH SMLPQASPFN  
AGPNDNFHFM FGSPFNLSA NYTGNLPGIG YDTPKQNL TWY

> *Morus notabilis* (XP\_010106128.1)

MGFSGNFDFL SAPPREGEEV MEHEAEATVE EDYSDEEMDV DELERRMWRD  
RMLLRRLKEQ NKGKQGADNA KQRQSSEQAR RKKMSRAQDG ILKYMLKMME  
VCKAQGFVYG IPEKGKPVGT GASDNLRAWW KEKVRFDRNG PAAIAKYQAD  
HSIPGHNEDE SAVASTPHTL QELQDTTLGS LLSALMQHCD PPQRRFPLEK  
GVSPWWPTG NEEWWPQLGL PKDQGPPPYK KPHDLKKAWK VSVLTAVIKH  
MSPDIKIRK LVRQSKCLQD KMTAKESATW LAIINQEEAL ARKLYPDRC  
PMSAGSGSL VISETSYDV EGVdGEPNFE VEECKPRDIN RFNIGAVSPR DRLLMQPVVA  
PQIKGELIET NTDFVQKRKQ LSEETMMLD QKVYTCEYSQ CPYNDYRLGF  
LDRTSRNNHQ MNCYPYRPNSC QPFGMSNFQI NNEKPAVFPV PFSQPKPGPQ  
PMSQTSFNV TGLDLPEDGQ KMISDLMSFY DNNAQQRSKD LNPGLNAME  
NHNPAQQKYQ FQIDDSYFGQ GVVMGGNIPE QANISSQNAV FPSTEVQFDQ  
CKAFDSPFDN NPNDNIVDLR FSSPFNMAPV EFPVDSLQK DVSLWYL

> Unigene0042139

MFTFEDMEFCGDLDFFCAPPGEINELTPKTEPEAVAEDDYSDDDEVDELERRLWRDKIRL  
KRLKELNKGKESVDVAKQRQSSEQARRKKMSRAQDILKYMLKMMEVCKAQGFVYGII  
PENGKPVGTASDNLREWWKDKVRFDRNGPAAIAKYKLENSSPGENRDICLAGLNTLQEL  
QDTTLGSLSSLMQHCNPPQRRFPLEKGVPPPWWPNGNEEWWTQLGLQKEQGPPPYKKP  
HDLKKAWKVGVLTAVIKHMSPDIAKIRKLVRQSKCLQDKMTAKESATWLAIINREEVLVR  
ELYPDRCPLSANNTGCGPFVADDCWEYDVEGADNEPSFNNLQDLKPSNQNERFIGHQLP  
HLTKDDIITNSDYSRKRKPTRLTNTMPPKVYTCEFCQCPYSNIHHGFSERSMRDNHQM  
SYRRNSTEFLQNFNKIEVTPDVFSQQFVQPISEPSFNL SGLGVPEDGQNMINDLFSFYD  
GNVGKGPSACHIFEETDLAVSGSVFPQSEDQFEHEKLFSTPFEVNPSTDFNYMLGSSFNPS  
VEYSGEFSGLVKETYGKQDVSIWF

> *Actinidia chinensis* (Achn346881)

MMIFDEMFC GDVDFFSAPL GEGDVTAPQT EQEAVADDDY SDEEMDVDEL  
ERRMWRDKMR LKRLKEMTKG KECVDSAKQR QSSEQARRKK MSRAQDGILK

YMLKMMEVCK AQGFVYGIIP EKGKPVSGAS DNLREWWKDK VRFDNRNGPAA  
IAKYQADNSI PGKNKGSNLV GPTPHTLQEL QDTTLGSLLS ALMQHCDPPQ  
RRFPLEKGVP PPWWPTGNEE WWPQLGVQMD QGPPPYKKPH DLKKAWKVG  
LTAVIKHMSP DIAKIRKLVR QSKCLQDKMT AKESTTWLAI INQEEALARE  
LYPDRCPPLS SSGSGSFSVI NDCSEYDVEG AEEHNFDVQ EQKPNNINLL NTGLGRIKDS  
FLGQQLSHPI KDEVITNLDF TRKRKPTNEL NNAMDPQIYT CEVLQCPHSE LRCGFHDRSS  
RDNHQLTCPF RSNSSEFGLT NFHNNEVKPI VFTQPFVQPH PAAPSVDSIQ RSFDISGLGV  
PEDGQKMISE LMSFYDANIQ GNRQSNPMNI SGSLDRALSQ SLPQPNICQ  
QDNNYIHGQG FVEGHVHEEA NLPFNLSMFS QQENRFDQRK VLSSQFEADP  
NDNFPLMFGS PLYLPCMDYP EHLPAVARDT LSKPDGSIWF \*

> *Actinidia chinensis*(Achn018431)

MIMFDEMFC GDLDFFSAPL GEGDMAAPQT EPEVVMDDDY SDEEIDVDEL  
ERRMWRDKMR LKRLKEMNKG KECVDAKQR QSSEQARRKK MSRAQDGILK  
YMLKMMEVCK AQGFVYGIIP EKGKPVSGAS DNLREWWKDK VRFDNRNGPAA  
IAKYQADNSI PGKNEGSDLV GPTPHTLQEL QDTTLGSLLS ALMQHCDPPQ  
RRFPLEKGVP PPWWPTGNEE WWPQLGVQMD QGPPPYKKPH DLKKAWKVG  
LTAVIKHMSP DIAKIRKLVR QSKCLQDKMT AKESATWLAI INQEEALARE  
RYPDRCPPL ASGGSGSFSVI NDCSEYDVEG DEEENFDVQ EQKPNSMTLL  
NMGMGRIKEG LLGQQLSHPI KDEVITNLDF TRKRKPTNEL NNVM DHKIYT  
CEVPQCPHSE LRCSLHDRSS RDNHQLSCP YRSNSTEFVLP SFRNNEIKPI VFPQPFVQPK  
PAAQSVNSIQ HSFDSLGLGV PEDGQKMINE LMSFYDSNIQ GNKQSNPMSI SVSSNQTL  
ALPQPNIDNN YIHGQGFVME RNICEEANLP VNLSMFSQQE NRFDHRKVLN  
SQFEANPNDN VPLMFASPFY LPSVDYPEHL PGLPRGDTLS KPDGSVWF\*

> *Actinidia chinensis* (Achn017871 )

MSNRMMMFDE MGFCGDLDL SAPLGDGDVT ASQTEPEAVV DDDYSDEEMG  
VDELERRMWR DKMRLKRLKE MNKGKECVAA AKQRQSQA RKKMSRAQD  
GILKYMLKMM EVCKAQGFVY GIPEKGKPV SGASDNLREW WKNKVRFDNR  
GPAIAKYQADNSIPGKSEG SNLVGPTPHT LQELQDTTLG SLLSALMQHC DPPQRRFPLE  
KGVHPPWWPT GNEEWWPQLG VQMDQGPPPY KKPHDLKKAW KVGVLTA  
HISPDIKIR KLVRQSKCLQ DKMTAKESAT WLAIINQEEA LARELYPDRC PPMSSSGSG  
SFFVINDCSEY DVEGADEPN FVQEQKPNN INLLNMGFGR IKDSFLGQQL SHPIKDEVIT  
NLDFTRKRKP TNELNNAMDH QIYTCILQC PHSELRHGFH DRSSRDNHQL  
SCP YRINSSE FGLSNFHNNE VKSIVFSQPF VHPQPAAPSV NSIQHSFDLS GLGVPEDGQK  
MISELMSVYD ANIQGNKQST PMNISGSSDR TLSQSLPQPN IQCQDNNYI  
HGRGFVMEGH IREEANLPVN LSTFSQHNR FDQRKVLSSQ FEANPNDSFP  
LMFGSPLYLP SMDYPEHLPA VTRDSLSPD ASIWFE\*

> *Coffea canephora* (Cc01.g07490)

MMMFDDIGFC GDLEFFSAPL KEADSVTPQA EPESDPVDD DYTDEEIDVD  
ELERRMWRDK MRLKRLKEMN KGKDGVDVAK QRQSQAARR KKMSRAQDGI  
LKYMLKMMEV CKAQGFVYGI IPEKGKPVSG ASDNLREWWK DKVRFDNRNGP  
AAIAKYQADN SIPGKNEGSN PVGPTPHTLQ ELQDTTLGSL LSALMQHCDP  
PQRRFPLEKG VPPWWPTGN EEWWPQLGLQ KDQGPPPYKK PHDLKKAWKV  
GVLTAVIKHM SPDIKIRKL VRQSKCLQDK MTAKESATWL AIINQEETLA  
RELFPDRCPP LLSSGGSGSF AMNDSSEYDV EGVEDEPNFD IQEQKPSNLH

LLNMATDRFK DRLPVQQQSH AIKDEVVTNL DFARKRKPAN ELDVMIDHKI  
YTCEFLQCPH SELRHGFQDR SSRDNHQLSC PFRNSPQFGV SNFNVNDVKP  
MVFPQSFVQP KSAALPVNAN PPSFNLSGIG VPEDGQRMIN DLMSFYESNI  
QGNKNADSGN AAVIKEQSVQ QPGMQCQSDN YLHGQGIMME GNIFEDTNVS  
SNRSIFQQGD RFEDTNIPAS RPMFQHGDRF DQCKITSSPF NNSNENFQFM FGSPFNLPSV  
DFTEGLPGIS RDNASKQDLP IWYH\*

> Sesamum indicum (XP\_011080515.1)

MMMFEDMGFC GDLDFSSAS IKEADVCPQLQ SAEPEPVVED DYSDEEIDVD  
ELERRMWRDK MRLKRLKEMN KGKEGIDAAK QRQSSEQARR KKMSRAQDGI  
LKYMLKMMEV CKAQGFVYGI IPEKGKPVSG ASDNLREWWK DKVRFDRNGP  
AAIAKYQVDN AIPGKNEGSN PVGPTPHTLQ ELQDTTLGSL LSALMQHCDP  
PQRRFPLEKG VPPPWWPSGK EEWWHQLGLQ KDQGPPPYKK PHDLKKAWKV  
GVLTAVIKHM SPDIAKIRKL VRQSKCLQDK MTAKESATWL AIINQEEALA  
RELYPDRCPP LSSPGSGTF PVSDSSEYDV EVADDESNEFD VQEQKPNTLG LLNIGMERFQ  
DRLPAQQQSH AIKDELMANF DFPRKRKPGS ELNVMMDHKI YTCEFLQCPH  
NELRHGFQDR ISRDNHQLSC PYKHSSEFGV SNFNINDIKP VVFPQSFVQP  
KPSALPVNPT PPSFDLSGLG VPEEGQRMIN ELMSFYDNNV QGNKNSNTGN  
AANAQESLQ QHSAQSRQDG YLQNQGLVLE GNIFEDKTIP NNLSIFRPPD  
RFDHRSKVITS PFNPNPTENF QLMFSSPFNI PPVDYTENFP GVPRNNLPKQ DITIWY

> Sesamum indicum (XP\_011080514.1)

MMMFEDMGFC GDLDFSSAS IKEADVCPQLQ SAEPEPVVED DYSDEEIDVD  
ELERRMWRDK MRLKRLKEMN KGKEGIDAAK QRQSSEQARR KKMSRAQDGI  
LKYMLKMMEV CKAQGFVYGI IPEKGKPVSG ASDNLREWWK DKVRFDRNGP  
AAIAKYQVDN AIPGKNEGSN PVGPTPHTLQ ELQDTTLGSL LSALMQHCDP  
PQRRFPLEKG VPPPWWPSGK EEWWHQLGLQ KDQGPPPYKK PHDLKKAWKV  
GVLTAVIKHM SPDIAKIRKL VRQSKCLQDK MTAKESATWL AIINQEEALA RELYPDRCPP  
LSSPGSGTF PVSDSSEYDV EVADDESNEFD VQEQKPNTLG LLNIGMERFQ  
DRLPAQQQSH AIKDELMANF DFPRKRKPGS ELNVMMDHKI YTCEFLQCPH  
NELRHGFQDR ISRDNHQLSC PYKHSSEFGV SNFNINDIKP VVFPQSFVQP  
KPSALPVNPT PPSFDLSGLG VPEEGQRMIN ELMSFYDNNV QGNKNSNTGN  
AANAQESLQ QHSAQSRQDG YLQNQGLVLE GNIFEDKTIP NNLSIFRPPD  
RFDHRSKVITS PFNPNPTENF QLMFSSPFNI PPVDYTENFP GVPRNNLPKQ DITIWY

> Carica papaya (evm.model.supercontig\_103.60)

MMMFDDMGPC GDMDFFCAPF SGGDVPAPQT EPEATVEDDY TDEEIDVDEL  
ERRMWRDKMR LKRLKEQSKS KEGSDVAKQR QSSEQARRKK MSRAQDGILK  
YMLKMMEVCK AQGFVYGIIP EKGKPVGTAS DNLREWWKDK VRFDNRGPAA  
IAKYQAENSI PGKNEGSNPI GPTPHTLQEL QDTTLGSLLS ALMQHCDPPQ  
RRFPLEKGVP PPWWPTGKEE WWPQLGLPKD QGPPPYKKPH DLKKAWKVG  
LTAVIKHMSP DIAKIRKLVR QSKCLQDKMT AKESATWLAI INQEEALARE  
LYPDSCPPLS SNGGSGSLVI NDCSEFDVEG AEDEPNFDVQ ERKPEKLNPP NLGVERMRI  
QQQPPFPIRG EVISNLDLIR KKRPSNDLNM MMDQKIYTCE HTQCPYSEL  
LGFHDRTSRD NHQLSCPYRG SSLEFGSSNF HVSEVKPVIF PQQFVRPKQA  
NSVQPSIDLS GLGVPELGQK MIGELMSIYD HNVQGNKNLN QGNHVSVEAQ  
TFLQPKIQHH QDQYFHGGG VMENFFFEES NVPDNHQMF S QNDNQLERLK



VMNSPF EANH NNHNFQLMFG SPFDLASFDY KEDLQAVGMD TLPKQQDVSI WFQ\*

> *Actinidia chinensis* (Achn347321)

MAAPQTEPEV VVDDDDYSDEE IDVDELERRM WRDKMRLKRL KEMNKGKECI  
DAAKQRQSQE QARRKKMSRA QDGILKYMLK MMEVCKAQGF VYGIIEPKGK  
PVSGASDNLR EWWKDKVRFD RINGPAAIAKY QADNSIPGKN EGSDLVGPTP  
HTLQELQD TT LGSLLSALMQ HCDPPQRRFP LEKGVPPPWW PTGNEEWWPQ  
LGVQMDQGPP PYKKPHDLKK AWKVGVLTA V IKHMSPDITK IRKLVRQSKC  
LQDKMTAKES ATWLAIINQE EALARELYPD RCHPLSSSGG SGSFVINDCS  
EYDVQGAEEE PNFDVQEQKP NSITLLNMGL GRIKDSMLGQ QLSHPIKDEV  
ITNLDFTKR KPTNELNNVM DHTIYTCEVL QCPHSELRRG FHDRSSRDNH  
QLSCPYSNS TEFVLPSFRN NEVKPIVFPQ TFVQPQPAAP SVNSIQHSFD LSGLGVPEDG  
QKMINELMSF YDSNIQGNKQ SNPLSISVSS DQTLSQLPP PNIQCQQDNN  
YIHGQAFVME GNICEEASLP VNISMFSQQE NRFDHRKILN SKFEANPNND  
FPLMFASPFY LPSVDYPEHV PGVPRGDTLS KPDSIWF\*

> *Solanum melongena* (Sme2.5\_04397.1\_g00003.1)

MMMFEDMGFC GDLDFFPAPL KEVEVVAPQS QTEPESVVDD DYSDEEIDMD  
ELERRMWRDK MKLKRLKEMS KSKEGVDPK QRRSQEQARR KKMSRAQDGI  
LKYMLKMMEV CKAQGFVYGI IPEKGKPVSG ASDNLREWWK DKVRFRDRNGP  
AAIAKYQADH PIPGMNEGSN PVGPTPHTLQ ELQD TT LGS L LSALMQHCDP  
PQRRFPLEK VSPWWPTGQ EDWWPQLGLQ KDQGRPPYKK PHDLKKAWKV  
GVLTA VIKHI SPDI AKIRKL VRQSKCLQDK MTAKESATWL AIINQEEALA QELYPDRCP  
LSSAGVCGNF MLNDSSEYDV EGAPDEPNFD IHEQKPNHLN LLNINVERFK  
EK MPLQQSY SNKEELVTNL DFLSKRKQAN EPTVMMDQKI YTCEFLQCPH  
NELRHGFQDR SSRDNHQFAC PYRNSSQFGV SNFQINEVKP AVFPQQYVQT  
KSSALPVNQG PPSFDLSGIG VPEDGQRMIN ELMSIYSDSV QGSKRQNRGN  
VALTKEPHQ QPRVHQDNYL LSQGIMEGNI FKNTSISATQ SILPQVDPFD  
QSKALNSSFN AGSNDNFHFM FGSPFNLQST NYNGNLP GIV YDTTPKQDAR IWY

> *Nicotiana tabacum* (XP\_016491027.1)

MMMFEE MGFC GDLDFFPAPL KEVETAASQI EQESEPVMDD DYSDEEIDVD  
ELERRMWRDK MKLKRLKEMT KGGKEGVDAV KQRQSSEQAR RKKMSRAQDG  
ILKYMLKMME VCKAQGFVYG IPEKGKPV T GASDNLREWW KDKVRFRDRNG  
PAAIAKYQAD NAIPGKNEGS NPIGPTPHTL QELQD TT LGS LLSALMQHCD  
PPQRRFPLEK GVPPPWWPTG QEDWWPQLGL SKDQGP PPYK KPHDLKKAWK  
VGVLTAVIKH MSPDI AKIRK LVRQSKCLQD KMTAKESATW LTIINQEEVL ARELYPDRCP  
PLSSAGSGT FTMNDSSEYD VDGVIDEPNF DVQE QKPNHL GLLNVNVDRF  
KERLTMRQQS LPIKDEIIIA NLDFTKRKRK ADELSFLMDQ KIYTCECLQC PHSELNRNGFQ  
DRSSRDNHQL TCPFRNSPQF GVS NFHVDEV KP VVFPQQYV QPKPASLPIN QAPPSFDLSG  
LGVPE DQRM INELMSFYDS NIQGNKNSMA GNVVMSKEQP RQQPSIQQNN  
YLHNQGIVLD GNIFGDTNIS ANHSVFPQGD RFDQSKVLTS PFNAGSNDNF  
HFMFGSPFNL QSTDYTEALS GITQDNMPKQ DVPVWY

> *Nicotiana glauca* (XP\_009801714.1)

MMMFEE MGFC GDLDFFPAPL KEVETAASQI EQESEPVMDD DYSDEEIDVD  
ELERRMWRDK MKLKRLKEMT KGGKEGVDAV KQRQSSEQAR RKKMSRAQDG  
ILKYMLKMME VCKAQGFVYG IPEKGKPV T GASDNLREWW KDKVRFRDRNG

|             |             |             |            |            |
|-------------|-------------|-------------|------------|------------|
| PAAIAKYQAD  | NAIPGKNEGS  | NPIGTPHTL   | QELQDTTLGS | LLSALMQHCD |
| PPQRRFPLEK  | GVPPPWWPTG  | QEDWWPQLGL  | SKDQGPPPYK | KPHDLKKAWK |
| VGVLTAVIKH  | MSPDIAKIRK  | LVRQSKCLQD  | KMTAKESATW | LIINQEEVL  |
| ARELYPDRCP  | PLSSAGSGT   | FTMNDSSSEYD | VDGVIDEPNF | DVQEKPKNHL |
| GLLNVNVDRLF | KERLTMRQQS  | LPIKDEIIIA  | NLDFTRKRKP | ADELSFLMDQ |
| KIYTCECLQC  | PHSELRNGFQ  | DRSSRDNHQL  | TCPFRNSPQF | GVSNFHVDEV |
| KPVVFPQQYV  | QPKPASLPIN  | QAPPSFDLSG  | LGVPEGDQRM | INELMSFYDS |
| NIQGNKNSMA  | GNVVMSSKEQP | RQQPSIQQNN  | YLHNQGIVLD | GNIFGDTNIS |
| ANHSVFPQGD  | RFDQSKVLTS  | PFNAGSNDNF  | HFMFGSPFNL | QSTDYTEALS |
| GITQDNMPKQ  | DVPVWY      |             |            |            |

> *Nicotiana tomentosiformis* (XP\_009607828.1)

|             |             |            |            |            |
|-------------|-------------|------------|------------|------------|
| MMMFDDMRFC  | GDLFFSAPL   | KEVEAAAPQT | EPEPEPVVDD | DYSDEEIDVD |
| ELERRMWRDK  | MKLKRLKEMT  | KSKEGVDPK  | HRQSSEQARR | KKMSRAQDGI |
| LKYMLKMMEV  | CKAQGFVYGI  | IPEKGKPVGG | ASDNLREWWK | DKVRFDNRGP |
| AAIAKYQADH  | AIPGMNEGSN  | PVGPTPHTLQ | ELQDTTLGSL | LSALMQHCDP |
| PQRRFPLEKG  | VSPWWPTGQ   | EDWWPQLGLQ | KEQGPPPYKK | PHDLKKAWKV |
| GVLTAVIKHM  | FPDIAKIRKL  | VRQSKCLQDK | MTAKESATWL | AIISQEEALA |
| RELYPDRCPP  | LSSAGASGTF  | ILDDSSEYDV | EGAQDEPNFD | VHEQKPNHLS |
| LLNIGAKRFRK | ETLPLQQQSH  | PNKDEFITNL | DFTRKRKQAN | ELTVMMDRKI |
| YTCEFQQCPH  | SELRNGFQDK  | SARDNHQFAC | PFRNSSQFGV | SNFNFNEVKP |
| VVFPQQYVQP  | KSASLPVNQG  | PPTFDLSGVG | VPEDGQRMIN | ELMSFYDSNI |
| QGNKSQNTGN  | IALTKEQPHQ  | QPRDNYLHSQ | GIMEGNIFKD | ANISTSHSML |
| PHGSPFNAGP  | NDNFHCFMFGS | PFNLQSANYT | GNLPCIGYDT | TPKQDLPTWY |

> *Nicotiana tomentosiformis* (XP\_009607827.1)

|             |             |            |            |            |
|-------------|-------------|------------|------------|------------|
| MMMFDDMRFC  | GDLFFSAPL   | KEVEAAAPQT | EPEPEPVVDD | DYSDEEIDVD |
| ELERRMWRDK  | MKLKRLKEMT  | KSKEGVDPK  | HRQSSEQARR | KKMSRAQDGI |
| LKYMLKMMEV  | CKAQGFVYGI  | IPEKGKPVGG | ASDNLREWWK | DKVRFDNRGP |
| AAIAKYQADH  | AIPGMNEGSN  | PVGPTPHTLQ | ELQDTTLGSL | LSALMQHCDP |
| PQRRFPLEKG  | VSPWWPTGQ   | EDWWPQLGLQ | KEQGPPPYKK | PHDLKKAWKV |
| GVLTAVIKHM  | FPDIAKIRKL  | VRQSKCLQDK | MTAKESATWL | AIISQEEALA |
| RELYPDRCPP  | LSSAGASGTF  | ILDDSSEYDV | EGAQDEPNFD | VHEQKPNHLS |
| LLNIGAKRFRK | ETLPLQQQSH  | PNKDEFITNL | DFTRKRKQAN | ELTVMMDRKI |
| YTCEFQQCPH  | SELRNGFQDK  | SARDNHQFAC | PFRNSSQFGV | SNFNFNEVKP |
| VVFPQQYVQP  | KSASLPVNQG  | PPTFDLSGVG | VPEDGQRMIN | ELMSFYDSNI |
| QGNKSQNTGN  | IALTKEQPHQ  | QPRDNYLHSQ | GIMEGNIFKD | ANISTSHSML |
| PHGSPFNAGP  | NDNFHCFMFGS | PFNLQSANYT | GNLPCIGYDT | TPKQDLPTWY |

> *Capsicum annuum* (CA01g13570)

|            |            |            |            |            |
|------------|------------|------------|------------|------------|
| MMMFEDIGFC | GDLFFPAPL  | KEVEAATAVP | PIEPEPLMDD | DYSDEEIDVE |
| ELEKRMWKDK | MKLKRLKEMS | KSKEGVDPVK | QRQSSEQARR | KKMSRAQDGI |
| LKYMLKMMEV | CKAQGFVYGI | IPEKGKPVGT | ASDNLREWWK | DKVRFDNRGP |
| AAIAKYQADN | AIPGKNEGSN | PTGPTPHTLQ | ELQDTTLGSL | LSALMQHCDP |
| PQRRFPLEKG | ISPPWWPNGQ | EDWWPQLGLP | KDQGPPPYKK | PHDLKKAWKV |
| GVLTAVIKHM | SPDIAKIRKL | VRQSKCLQDK | MTAKESATWL | VIINQEEVLA |
| RELYPDRCPP | LSSAAGSGTL | SMNDSSEYDV | EGAVDDPTFD | VQEKPKNHLS |
| LLNVDVEMFK | ALPLQQQSH  | IKDELIALND | FTHKRKPADD | LSFMMDQKIY |
| TCECLQCPS  |            |            |            |            |

ELRHGFPDRS TRDNHQLTCS FRNTSQFGVS NFHIDEVKPV IFAQQCVQPK  
 QAQLPVNPAQ PSFDPSGFEV PKDGQTVIND LMSFYESNVE GNKSSMAGNV  
 VMSKEQPHQL TSVQQNNFLQ SHGIVLECSI FGDNNISANH SIFVQGDRYD  
 QSKVLTSPFN AGPNDNFNFM FGSPSNVQST DYSESFSSIS YDNMLKQDVP VWY\*

> *Nicotiana tomentosiformis* (XP\_009587969.1)

MMMFEEIMGFC GDLDFFPAPL KEVETAASQI EQEQEQEPVM DDDYSDEEID  
 VDELERRMWR DKMKLKRLE MTKGGKEGVD AVKQRQSSEQ ARRKKMSRAQ  
 DGILKYMLKM MEVCKAQGFV YGIIPEKGGP VTGASDNLRE WWKDKVRFDR  
 NGPAAIAKYQ ADNAIPGKNE GSNPIGTPH TLQELQDTTL GSLLSALMQH  
 CDPQRRFPL EKGVPWWP TGQEDWWPQL GLSKDQGPPP YKKPHDLKKA  
 WKVGVLTAVI KHMSPDIAKI RKLVRQSKCL QDKMTAKESA  
 TWLAIINQEEVLARELYPDR CPPLSSAGGS GTFTMNDSSSE YDVDGVVDEP  
 NFDVQEQKPN HLGLLNVNVD RFKERLPMQ QSLPIKDEIM IANLDFTRKR  
 KPADELTFM DQKIYTCECL QCPHSELNG FQDRSSRDNH QLTCPFRNSP  
 QFGVSNFHVD EVKPVVFPQQ YVQPKPASLP INQAPPSFDL SGIGVPEDGQ  
 RMINELMSFY DNNIQGNKSS MAGNVVMSKE QPRQQPSIQQ NNYLHNQGII  
 LDGNIFGDTN ISANHSMFPQ GDRFDQSKVL TSPFNAGSND NFHFMMFGSPF  
 NLQSTDYTEA LSGITQDNMP KQDVPVWY

> *Nicotiana tabacum* (XP\_016495135.1)

MMMFEEIMGFC GDLDFFPAPL KEVETAASQI EQEQEQEPVM DDDYSDEEID  
 VDELERRMWR DKMKLKRLE MTKGGKEGVD AVKQRQSSEQ ARRKKMSRAQ  
 DGILKYMLKM MEVCKAQGFV YGIIPEKGGP VTGASDNLRE WWKDKVRFDR  
 NGPAAIAKYQ ADNAIPGKNE GSNPIGTPH TLQELQDTTL GSLLSALMQH  
 CDPQRRFPL EKGVPWWP TGQEDWWPQL GLSKDQGPPP YKKPHDLKKA  
 WKVGVLTAVI KHMSPDIAKI RKLVRQSKCL QDKMTAKESA TWLAIINQEE  
 VLARELYPDR CPPLSSAGGS GTFTMNDSSSE YDVDGVVDEP NFDVQEQKPN  
 HLGLLNVNVD RFKERLPMQ QSLPIKDEIM IANLDFTRKR KPADELTFM  
 DQKIYTCECL QCPHSELNG FQDRSSRDNH QLTCPFRNSP QFGVSNFHVD  
 EVKPVVFPQQ YVQPKPASLP INQAPPSFDL SGIGVPEDGQ RMINELMSFY DNNIQGNKSS  
 MAGNVVMSKE QPRQQPSIQQ NNYLHNQGII LDGNIFGDTN ISANHSMFPQ  
 GDRFDQSKVL TSPFNAGSND NFHFMMFGSPF NLQSTDYTEA LSGITQDNMP KQDVPVWY

> *Nicotiana tabacum* (XP\_016495136.1)

MMMFEEIMGFC GDLDFFPAPL KEVETAASQI EQEQEQEPVM DDDYSDEEID  
 VDELERRMWR DKMKLKRLE MTKGGKEGVD AVKQRQSSEQ ARRKKMSRAQ  
 DGILKYMLKM MEVCKAQGFV YGIIPEKGGP VTGASDNLRE WWKDKVRFDR  
 NGPAAIAKYQ ADNAIPGKNE GSNPIGTPH TLQELQDTTL GSLLSALMQH  
 CDPQRRFPL EKGVPWWP TGQEDWWPQL GLSKDQGPPP YKKPHDLKKA  
 WKVGVLTAVI KHMSPDIAKI RKLVRQSKCL QDKMTAKESA  
 TWLAIINQEEVLARELYPDR CPPLSSAGGS GTFTMNDSSSE YDVDGVVDEP  
 NFDVQEQKPN HLGLLNVNVD RFKERLPMQ QSLPIKDEIM IANLDFTRKR  
 KPADELTFM DQKIYTCECL QCPHSELNG FQDRSSRDNH QLTCPFRNSP  
 QFGVSNFHVD EVKPVVFPQQ YVQPKPASLP INQAPPSFDL SGIGVPEDGQ RMINELMSFY  
 DNNIQGNKSS MAGNVVMSKE QPRQQPSIQQ NNYLHNQGII LDGNIFGDTN  
 ISANHSMFPQ GDRFDQSKVL TSPFNAGSND NFHFMMFGSPF NLQSTDYTEA

LSGITQDNMP KQDVPVWY

> *Solanum tuberosum* (PGSC0003DMP400015316)

```
MMMFEDIGFC  GDLDFPAPL  KEAETVAAPV  LIEPEPMMDD  DDSDEEIDVD
ELEKRMWRDK  MKLKRLKEMS  KGKEGVDAVK  QRQSSEQARR  KKMSRAQDGI
LKYMLKMMEV  CKAQGFVYGI  IPEKGKPVGT  ASDNLREWWK  DKVRFDNRNGP
AAIAKYQADN  AIPGKNEGSN  PIGTPHTLQ   ELQDCTLGSL  LSALMQHCDP
PQRRFPLEKG  VSPPWWPNQG  EDWWPQLGLP  NDQGPPPYKK  PHDLKKAWKV
GVLTAVIKHI SPDIKIRKL VRQSKCLQDK MTAKESATWL AIINQEEVLA RELYPDRCP
LSSGGGSGTF  TMNDSSEYDV  EGAIDDPFD  IQEQKPNHLS  LLNVSVEMFK
EKLPLLQSQS  PMKGDIFANL  DFTRKRKPAD  DLTFMLDPKI  YTCECLQCPH
SELRNGFPDR  SSRDNHQLTC  LFRNTSQFGV  PNFHVEEVKP  VVFPQQYAQP
KQASLPVNPA  PPSFDTSGLG  VPADGQRVIN  ELMSFYESNV  QGNKSSMAGN
VVMSEKQPLQ  QPSIQNNYL  QSQGNVLEGS  IFGDTNISAN  NSMFVQGDRF
DQSKVLTSPF NAGSNDDFNF MFGSPFNLQS TDLSECLSGISHDDMTKQDT SVWY*
```

> *Solanum tuberosum* (PGSC0003DMP400015315)

```
MMMFEDIGFC  GDLDFPAPL  KEAETVAAPV  LIEPEPMMDD  DDSDEEIDVD
ELEKRMWRDK  MKLKRLKEMS  KGKEGVDAVK  QRQSSEQARR  KKMSRAQDGI
LKYMLKMMEV  CKAQGFVYGI  IPEKGKPVGT  ASDNLREWWK  DKVRFDNRNGP
AAIAKYQADN  AIPGKNEGSN  PIGTPHTLQ   ELQDCTLGSL  LSALMQHCDP
PQRRFPLEKG  VSPPWWPNQG  EDWWPQLGLP  NDQGPPPYKK  PHDLKKAWKV
GVLTAVIKHI SPDIKIRKL VRQSKCLQDK MTAKESATWL AIINQEEVLA RELYPDRCP
LSSGGGSGTF  TMNDSSEYDV  EGAIDDPFD  IQEQKPNHLS  LLNVSVEMFK
EKLPLLQSQS  PMKGDIFANL  DFTRKRKPAD  DLTFMLDPKI  YTCECLQCPH
SELRNGFPDR  SSRDNHQLTC  LFRNTSQFGV  PNFHVEEVKP  VVFPQQYAQP
KQASLPVNPA  PPSFDTSGLG  VPADGQRVIN  ELMSFYESNV  QGNKSSMAGN
VVMSEKQPLQ  QPSIQNNYL  QSQGNVLEGS  IFGDTNISAN  NSMFVQGDRF
DQSKVLTSPF  NAGSNDDFNF  MFGSPFNLQS  TDLSECLSGI  SHDDMTKQDT  SVWY*
```

> *Nicotiana glauca* (XP\_009798829.1)

```
MMMFEEGMFC  GDLDFPAPL  KEVEVAAPHT  EPKPELVVDD  DYSDEEIDMD
ELERRMWRDK  MKLKRLKEMT  KSKEGVDPK  HRQSSEQARR  KKMSRAQDGI
LKYMLKMMEV  CKAQGFVYGI  IPEKGKPVGG  ASDNLREWWK  DKVRFDNRNGP
AAIAKYQADH  AIPGMNEGSN  PVGTPHTLQ   ELQDCTLGSL  LSALMQHCDP
PQRRFPLEKG  VSPPWWPTGQ  EDWWPQLGLQ  KEQGPPPYKK  PHDLKKAWKV
GVLTAVIKHI FPDIAKIRKL VRQSKCLQDK MTAKESATWL AIISQEEALA RELYPDRCPA
LSSAGASGTF  ILDDSSEYDV  EGAQDEPNFD  VHEQKPNHLS  LLNIGVERFK
ETLPLQQQSH  PNKDEFITNL  DFTRKRKQAN  ELTVMMMDQKI  YTCEFQQCPH
SELRNGFQGK  SARDNHQFAC  PFRNSSQFGV  SNFNFNEVKP  VVFPQQYVQP
KSASLPVNQG  PPTFDLSGVG  VPEDGQRMIT  ELMSFYDSNI  QGNKSQNTGN
VALTKEQPHQ  QPRVNQDNYL  HSQGIMEGNI  FKDANISTSH  SMLPQASPFN
AGPNDNFHFM FGSPFNLQSA NYTGNLPGIG YDTPKQNL  TWY
```

> *Arabidopsis thaliana* (AT2G27050.1)

```
MMMFNEMGMY  GNMDFFSSST  SLDVCPLPQA  EQEPVVEDVD  YTDDMDVDE
LEKRMWRDKM  RLKRLKEQQS  KCKEGVDGSK  QRQSSEQARR  KKMSRAQDGI
LKYMLKMMEV  CKAQGFVYGI  IPEKGKPVGT  ASDNLREWWK  DKVRFDNRNGP
```

AAIAKYQSEN NISGGSNDCN SLVGPTPHTL QELQDTTLGS LLSALMQHCD  
PPQRRFPLEK GVSPWWPNG NEEWWPQLGL PNEQGPPPYK KPHDLKKAWK  
VGVLTAVIKH MSPDIKIRK LVRQSKCLQD KMTAKESATW LAIINQEEVV ARELYPESCP  
PLSSSSSLGS GSELLINDCSE YDVEGFEKEQ HGFDVEERKP EIVMMHPLAS  
FGVAKMQHFP IKEEVATTVN LEFTRKRKQN NDMNVMVMMDR SAGYTCENGQ  
CPHSKMNLGF QDRSSRDNHQ MVCOPYRDNRL AYGASKFHMG GMKLVVPQQP  
VQPIDLSGVG VPENGQKMIT ELMAMYDRNV QSNQTPPTLM ENQSMVIDAK  
AAQNQQLNFN SGNQMFMQQG TNNGVNNRFQ MVFDSTPFDM AAFDYRDDWQ  
TGAMEGMGKQ QQQQQQQQDV SIWF

>Unigene0012139

MGMFDEMGCGLSLEFLYPPQEAVGTEPEQDANVDEDYSDEEMDVDELERRMWRDKMR  
LKRLKDQKNKGKDGISLDATKQRSSEQARRKKMSRAQDGILKYMLKMMEVCKAQGF  
VYGIPEKGKPVSGASDNLRAWWKEKVRFRDRNGPAAISKYQSEHLILGKNEDFGPVGPTP  
HTLHELQDTTLGSLLSALMQHCDPPQRRFPLEKGIAPPWWPTGEDGTPPYKKPHDLKKA  
WKVGVLTAVIKHMSPDIDKIRKLVRQSKCLQDKMTAKESATWLAIINQEEAEIRKLYPDSC  
PPLAFGSGSYVISDSSDYDVEGVDDGAEDFKPKFNLGNELFMGPVKGEIIEISSSDVAQKR  
KIPVDEHNSLMMDQKIYTCEYPKCPFSNQVGLDRMSRNNHQMTCPYRVNGNTNSSQG  
FEITNCQSNKKTPVFPIPAYMQPKLTPPQLNHGFLSPFNGSNVALTEDTHKPIPDLSFYD  
ANLQHNKGLNSCGQSYIANQAPDQQSFQVYDSLYGQNMGLNNHLLPTNEFHIDRCKTYS  
STAFDNMENVNAGSPFNFG

> Arabidopsis thaliana (AT2G27050.1)

MMMFNEMGMY GNMDFFSSST SLDVCPLPQA EQEPVVEDVD YTDDEMVDVE  
LEKRMWRDKM RLKRLKEQQS KCKEGVDGSK QRSSEQARR KKMSRAQDGI  
LKMYMLKMMEV CKAQGFVYGI IPEKGKPVGT ASDNLREWWK DKVRFRDRNGP  
AAIAKYQSEN NISGGSNDCN SLVGPTPHTL QELQDTTLGS LLSALMQHCD  
PPQRRFPLEK GVSPWWPNG NEEWWPQLGL PNEQGPPPYK KPHDLKKAWK  
VGVLTAVIKH MSPDIKIRK LVRQSKCLQD KMTAKESATW LAIINQEEVV  
ARELYPESCP PLSSSSSLGS GSELLINDCSE YDVEGFEKEQ HGFDVEERKP EIVMMHPLAS  
FGVAKMQHFP IKEEVATTVN LEFTRKRKQN NDMNVMVMMDR SAGYTCENGQ  
CPHSKMNLGF QDRSSRDNHQ MVCOPYRDNRL AYGASKFHMG GMKLVVPQQP  
VQPIDLSGVG VPENGQKMIT ELMAMYDRNV QSNQTPPTLM ENQSMVIDAK  
AAQNQQLNFN SGNQMFMQQG TNNGVNNRFQ MVFDSTPFDM AAFDYRDDWQ  
TGAMEGMGKQ QQQQQQQQDV SIWF

> Citrus clementina (Ciclev10000606m)

MGIFEEMGFC GNLEFFSSPH GEGEAFLEHE QETAAEEDYS DEEMDVDELE  
RRMWRDRMLL KKLKEQSKSK ECVDSAKQRQ SEQARRKKM SRAQDGILKY  
MLKMMEVCKA QGFVYGIPE KGKPVSGASD NLRAWWKEKV RFDRNGPAAI  
AKYQADHAIL GKNEDCGSVV STPHSLQELQ DTTLGSLLSA LMQHCDPPQR  
RFPLEKGVAP PWWPNGNEEW WPQLGLPKDL GPPPYKKPHD LKKAWKVSVL  
TAVIKHMFDP IAKIRKLVRQ SKCLQDKMTA KESATWLAVI NQEEALSRLK  
YPDSCPPVSA GSGSFIISD SSDYDVEGVE DDRNVEVEEI KPRDVNLFNM  
GAMGRDRLMM TPPMVPQIKG ELVETNSDFI QKRKQPADQS HLMMDQKIYT  
CEFPQCPYGD YRLGFLERSS RNNHQLNCPY RHNSSQGFGM PNFQVNNDQT  
VAFSRPFAQP TQPKPATPPK NQTQSQFNIS GLELPDDGQK MITDLMSFYD

TNHQQNKSLN SGNLNAIGDQ NQQQEQRKFQ LQMDDSFYSQ GAVMGRNMPG  
QSNMPMNNSV FSSAEIRFDQ CKAFDSPYDA NPSDSIADFR FNSPFNMAV  
DYAMDSIPKQ DVSLWYL\*

> Citrus clementina (Ciclev10000608m)

MGIFEEMGFC GNLEFFSSPH GEGEAFLEHE QETAAEEDYS DEEMDVDELE  
RRMWRDRMLL KKLKEQSKSK ECVDSAKQRQ SQEQARRKKM SRAQDGILKY  
MLKMMEVCKA QGFVYGIPE KGKPVSGASD NLRAWWKEKV RFDRNGPAAI  
AKYQADHAIL GKNEDCGSVV STPHSLQELQ DTTLGSLLSA LMQHCDPPQR  
RFPLEKGVAP PWWPNGNEEW WPQLGLPKDL GPPPYKKPHD LKKAWKVSVL  
TAVIKHMFPD IAKIRKLVRQ SKCLQDKMTA KESATWLAVI NQEEALSRLK  
YPDSCPPVSA GGSGSFIISD SSDYDVEGVE DDRNVEVEEI KPRDVNLFNM  
GAMGRDRLMM TPPMVPQIKG ELVETNSDFI QKRKQPADQS HLMMDQKIYT  
CEFPQCPYGD YRLGFLERSS RNNHQLNCPY RHNSSQGFGM PNFQVNNDQT  
VAFSRPFAQP TQPKPATPPK NQTQSQFNIS GLELPDDGQK MITDLMSFYD  
TNHQQNKSLN SGNLNAIGDQ NQQQEQRKFQ LQMDDSFYSQ GAVMGRNMPG  
QSNMPMNNSV FSSAEIRFDQ CKAFDSPYDA NPSDSIADFR FNSPFNMAV  
DYAMDSIPKQ DVSLWYL\*

> Citrus clementina (Ciclev10000607m)

MGIFEEMGFC GNLEFFSSPH GEGEAFLEHE QETAAEEDYS DEEMDVDELE  
RRMWRDRMLL KKLKEQSKSK ECVDSAKQRQ SQEQARRKKM SRAQDGILKY  
MLKMMEVCKA QGFVYGIPE KGKPVSGASD NLRAWWKEKV RFDRNGPAAI  
AKYQADHAIL GKNEDCGSVV STPHSLQELQ DTTLGSLLSA LMQHCDPPQR  
RFPLEKGVAP PWWPNGNEEW WPQLGLPKDL GPPPYKKPHD LKKAWKVSVL  
TAVIKHMFPD IAKIRKLVRQ SKCLQDKMTA KESATWLAVI NQEEALSRLK YPDSCPPVSA  
GGSGSFIISD SSDYDVEGVE DDRNVEVEEI KPRDVNLFNM GAMGRDRLMM  
TPPMVPQIKG ELVETNSDFI QKRKQPADQS HLMMDQKIYT CEFPQCPYGD  
YRLGFLERSS RNNHQLNCPY RHNSSQGFGM PNFQVNNDQT VAFSRPFAQP  
TQPKPATPPK NQTQSQFNIS GLELPDDGQK MITDLMSFYD TNHQQNKSLN  
SGNLNAIGDQ NQQQEQRKFQ LQMDDSFYSQ GAVMGRNMPG QSNMPMNNSV  
FSSAEIRFDQ CKAFDSPYDA NPSDSIADFR FNSPFNMAV DYAMDSIPKQ DVSLWYL\*

> Citrus clementina (Ciclev10000609m)

MGIFEEMGFC GNLEFFSSPH GEGEAFLEHE QETAAEEDYS DEEMDVDELE  
RRMWRDRMLL KKLKEQSKSK ECVDSAKQRQ SQEQARRKKM SRAQDGILKY  
MLKMMEVCKA QGFVYGIPE KGKPVSGASD NLRAWWKEKV RFDRNGPAAI  
AKYQADHAIL GKNEDCGSVV STPHSLQELQ DTTLGSLLSA LMQHCDPPQR  
RFPLEKGVAP PWWPNGNEEW WPQLGLPKDL GPPPYKKPHD LKKAWKVSVL  
TAVIKHMFPD IAKIRKLVRQ SKCLQDKMTA KESATWLAVI NQEEALSRLK  
YPDSCPPVSA GGSGSFIISD SSDYDVEGVE DDRNVEVEEI KPRDVNLFNM  
GAMGRDRLMM TPPMVPQIKG ELVETNSDFI QKRKQPADQS HLMMDQKIYT  
CEFPQCPYGD YRLGFLERSS RNNHQLNCPY RHNSSQGFGM PNFQVNNDQT  
VAFSRPFAQP TQPKPATPPK NQTQSQFNIS GLELPDDGQK MITDLMSFYD  
TNHQQNKSLN SGNLNAIGDQ NQQQEQRKFQ LQMDDSFYSQ GAVMGRNMPG  
QSNMPMNNSV FSSAEIRFDQ CKAFDSPYDA NPSDSIADFR FNSPFNMAV  
DYAMDSIPKQ DVSLWYL\*

> *Populus trichocarpa* (Potri.008G011300.3)

|            |            |            |            |                 |
|------------|------------|------------|------------|-----------------|
| MGIFEEMGFC | NNLDFFSAPP | GEMDVVPECE | PEATIEEDYS | DEEMDVDELE      |
| RRMWRDRMLL | RRLKEQSKNT | EVVDNAKQRQ | SSEQARRKKM | SRAQDGILKY      |
| MLKMMEVCKA | QGFVYGIPE  | KGKPVSGASD | NLRGWWKEKV | RFDRNGPAAI      |
| SKYQADHAIP | GKSEDCGPAA | STPHTLQELQ | DTTLGSLLSA | LMQHCDPPQR      |
| RFPLEKGVAP | PWWPTGNEEW | WPQQGLPKDQ | GPPPYKKPHD | LKKAWKVSVL      |
| TAVIKHLSPD | IAKIRKLVRQ | SKCLQDKMTA | KESATWLAI  | NQEEALSRL       |
| YPDSCLPMSA | GGSGSLIISD | SSDYDVEGVD | DEPNVEVEDC | KPLDVNLFNM      |
| ATAAGPRDRF | MMPPVAPQIK | GEHVETNMSF | IQKRKQPAGE | PHMMVDQKMY      |
| RCEYPQCPYN | DSRFGFLDVT | ARNNHQMNC  | YRTNTSQGFG | MSNFQINSDK      |
| PAVFSLPFPQ | TKAAAPNQTP | SFNVSGGLP  | EDGKKSISDL | MSFYDTNLQR      |
| DKNMNPGSAN | QQQKFQFQLD | DSFYGQGAIM | GNNITEVTSM | PVNSSAFPST      |
| EMQFDHCKAF | DSAFDANVND | NVADFRFGSP | FTMPPVDYSM | DPMPKQDAGM WYV* |

> *Populus trichocarpa* (Potri.008G011300.2)

|            |            |            |            |                 |
|------------|------------|------------|------------|-----------------|
| MGIFEEMGFC | NNLDFFSAPP | GEMDVVPECE | PEATIEEDYS | DEEMDVDELE      |
| RRMWRDRMLL | RRLKEQSKNT | EVVDNAKQRQ | SSEQARRKKM | SRAQDGILKY      |
| MLKMMEVCKA | QGFVYGIPE  | KGKPVSGASD | NLRGWWKEKV | RFDRNGPAAI      |
| SKYQADHAIP | GKSEDCGPAA | STPHTLQELQ | DTTLGSLLSA | LMQHCDPPQR      |
| RFPLEKGVAP | PWWPTGNEEW | WPQQGLPKDQ | GPPPYKKPHD | LKKAWKVSVL      |
| TAVIKHLSPD | IAKIRKLVRQ | SKCLQDKMTA | KESATWLAI  | NQEEALSRL       |
| YPDSCLPMSA | GGSGSLIISD | SSDYDVEGVD | DEPNVEVEDC | KPLDVNLFNM      |
| ATAAGPRDRF | MMPPVAPQIK | GEHVETNMSF | IQKRKQPAGE | PHMMVDQKMY      |
| RCEYPQCPYN | DSRFGFLDVT | ARNNHQMNC  | YRTNTSQGFG | MSNFQINSDK      |
| PAVFSLPFPQ | TKAAAPNQTP | SFNVSGGLP  | EDGKKSISDL | MSFYDTNLQR      |
| DKNMNPGSAN | QQQKFQFQLD | DSFYGQGAIM | GNNITEVTSM | PVNSSAFPST      |
| EMQFDHCKAF | DSAFDANVND | NVADFRFGSP | FTMPPVDYSM | DPMPKQDAGM WYV* |

> *Populus trichocarpa* (Potri.010G247500.8)

|            |            |            |            |                 |
|------------|------------|------------|------------|-----------------|
| MGIFEEMGFC | NNLDFFSAPP | GEMDAVPERE | PGATIEEDYS | DEEMDVDELE      |
| RRMWRDRMLL | RRLKEQGKNT | EVVDHAKHRQ | SSEQARRKKM | SRAQDGILKY      |
| MLKMMEVCKA | QGFVYGIPE  | KGKPVSGASD | NLRGWWKEKV | RFDRNGPAAI      |
| SKYQADHSIP | GKSEDCGPAA | STPHTLQELQ | DTTLGSLLSA | LMQHCDPPQR      |
| RFPLEKGVAP | PWWPTANEWW | WPQLGLPKDQ | GPPPYKKPHD | LKKAWKVSVL      |
| TAVIKHISPD | IAKIRKLVRQ | SKCLQDKMTA | KESATWLAI  | NQEETLSRL       |
| YPDSCLPMSA | GGSGSCLISD | SSDYDVEGVD | DEPNVEVEDC | KPLDVNLFNM      |
| ATAAGPSDRF | MMPPVAPQIK | GEHVETNMSF | IQKRKQPAGE | PHMMVDQKMY      |
| RCEYPQCPYN | DSRFGFLDVT | ARNNHQMNC  | YRTNTSQGFG | MSNFQINSDK      |
| PAVFSLPFPQ | TKAAAPNQTP | SFNVSGGLP  | EDGKKSISDL | MSFYDTNLQR      |
| DKNMNPGSAN | QQQKFQFQLD | DSFYGQGAIM | GNNITEVTSM | PVNSSAFPST      |
| EMQFDHCKAF | DSAFDANVND | NVADFRFGSP | FTMPPVDYSM | DPMPKQDAGM WYV* |

> *Morus notabilis* (XP\_010106127.1)

|            |            |            |            |            |
|------------|------------|------------|------------|------------|
| MGIFEELGFS | GNFEFLSAPP | REAEAELEHE | PEATTEVEDY | SDDMDVDEL  |
| ERRMWRDRML | LRRLKEQNK  | KQGADNARQR | QSSEQARRKK | MSRAQDGILK |
| YMLKMMEVCK | AQGFVYGIIP | EKGKPVSGAS | DNLRAWWKEK | VRFDNRGPAA |
| IAKYQSDHSI | PGQNEDCSTV | ASTPHTLQEL | QDTTLGSLLS | ALMQHCDPPQ |

RRFPLEKGVA PPWWPNGSEE WWPQLGLPKD QGPPPYKKPH DLKKAWKVG  
 LTAVIKHMSP DIAKIRKLVR QSKCLQDKMT AKESATWLAI INQEEALARK  
 LYPDRCPPVS AASSGSFVIN DTSYDVEGV NFEPNIEVEE CKPRNVNLFN IGSVAPRDL  
 MMQPVPVPPKI KGEILETNLD FVQKRKTLAE EPQVTLDQKI YNCEHPQCPY  
 HDYRLGFLDR TSRNNHQMNC PYRCNSSQAF GMSGFQVNND KPAVLSMPFS  
 QPKPPAPVT QTAQVGIAGL GLPEDGQKMI SDLLSFYDIN MPQRRKSLNP  
 GNFTATEHHD PQQQNYQFQM DDGFYSQSG VMGGNTNAPL QTNIPSHHAV  
 FPSSDVQFDQ CKAFFDSSLN NPTDNISDIR FGSPFNLAPA EYTVDSLPKQ DVSLWYI

> Citrus clementina (Ciclev10000619m)

MGIFEEMGFC GNLEFFSALP GEGEAVMGHE METAVEEDCS DEEVDVDELE  
 RRMWRDRLLL KRLKEQNKSK EGVDSAKHRQ SQEQARRKKM SRAQDGILKY  
 MLKMMEVCKA QGFVYGIPE KGKPVGTASD NLRAWWKEKV RFDRNGPAAI  
 AKYQADHAIP GKNEDFGTVV STPHTLQELQ DTTLGSLLSA LMQHCNPPQR  
 RFPLEKGVAP PWWPTGTEEW WPGLGLPKDQ GPPPYKKPHD LKKAWKVGVL  
 TAVIKHMSPD IAKIRKLVRQ SKCLQDKMTA KESATWLAI INQEEALSRKL YPDSCIPAST  
 GGSGSFIISD ISDYDVEGVD NERNVEVEEI KPLEANLFNM GAMGSRDRML  
 MPPSLVPRIK GEVFETHSES IQKRRQSADE PHMTIDQKIY TCEFTQCPYN DYHHGFLDRT  
 SRNNHQLNCP YRNNSQGC V MPNFQINNDQ PAVFSLPFAQ STHPKPITPV  
 KNQTQPQYNV SGLGLPDDGQ KMISDLMSFY DTNLQPNKSM SQGCLNVTED  
 RNQQPEQQKF QLQLDDSFYN QGVGVMKGGN MPVNNPVFSS TEVHFDQCKA  
 FDSFPDNNPG DNIAEFRFNS PFNIASVDYP MDPIPKQDVS MWYL\*

> Citrus clementina (Ciclev10000617m)

MGIFEEMGFC GNLEFFSALP GEGEAVMGHE METAVEEDCS DEEVDVDELE  
 RRMWRDRLLL KRLKEQNKSK EGVDSAKHRQ SQEQARRKKM SRAQDGILKY  
 MLKMMEVCKA QGFVYGIPE KGKPVGTASD NLRAWWKEKV RFDRNGPAAI  
 AKYQADHAIP GKNEDFGTVV STPHTLQELQ DTTLGSLLSA LMQHCNPPQR  
 RFPLEKGVAP PWWPTGTEEW WPGLGLPKDQ GPPPYKKPHD LKKAWKVGVL  
 TAVIKHMSPD IAKIRKLVRQ SKCLQDKMTA KESATWLAI INQEEALSRKL YPDSCIPAST  
 GGSGSFIISD ISDYDVEGVD NERNVEVEEI KPLEANLFNM GAMGSRDRML  
 MPPSLVPRIK GEVFETHSES IQKRRQSADE PHMTIDQKIY TCEFTQCPYN DYHHGFLDRT  
 SRNNHQLNCP YRNNSQGC V MPNFQINNDQ PAVFSLPFAQ STHPKPITPV  
 KNQTQPQYNV SGLGLPDDGQ KMISDLMSFY DTNLQPNKSM SQGCLNVTED  
 RNQQPEQQKF QLQLDDSFYN QGVGVMKGGN MPVNNPVFSS TEVHFDQCKA  
 FDSFPDNNPG DNIAEFRFNS PFNIASVDYP MDPIPKQDVS MWYL\*

> Citrus sinensis (orange1.1g007174m)

MGIFEEMGFC GNLEFFSALP GEGEAVMGHE METAVEEDCS DEEVDVDELE  
 RRMWRDRLLL KRLKEQNKSK EGVDSAKHRQ SQEQARRKKM SRAQDGILKY  
 MLKMMEVCKA QGFVYGIPE KGKPVGTASD NLRAWWKEKV RFDRNGPAAI  
 AKYQADHAIP GKNEDFGTVV STPHTLQELQ DTTLGSLLSA LMQHCNPPQR  
 RFPLEKGVAP PWWPTGTEEW WPGLGLPKDQ GPPPYKKPHD LKKAWKVGVL  
 TAVIKHMSPD IAKIRKLVRQ SKCLQDKMTA KESATWLAI INQEEALSRKL YPDSCIPAST  
 GGSGSFIISD ISDYDVEGVD NERNVEVEEI KPLEANLFNM GAMGSRDRML  
 MPPSLVPRIK GEVFETHSES IQKRRQSADE PHMTIDQKIY TCEFTQCPYN DYHHGFLDRT  
 SRNNHQLNCP YRNNGSQGC V MPNFQINNDQ PAVFSLPFAQ STHPKPITSV



KNQTQPQYNV SGLGLPDDGQ KMISDLMSFY DTNLQPNKSM SQGCLNVTED  
RNQQPEQQKF QLQLDDSFYN QGVGVMKGGN MPVNNPVFSS TEVHFDQCKA  
FDSPFDNPNP DNIAEFRFNS PFNIASVDYP MDPIPKQDVS MWYL\*

> Citrus sinensis (orange1.1g007186m)

MGIFEEMGFC GNLEFFSALP GEGEAVMGHE METAVEEDCS DEEVDVDELE  
RRMWRDRLLL KRLKEQNKSK EGVDSAKHRQ SQEQARRKKM SRAQDGILKY  
MLKMMEVCKA QGFVYGIPE KGKPVGTASD NLRAWWKEKV RFDRNGPAAI  
AKYQADHAIP GKNEDFGTVV STPHTLQELQ DTTLGSLLSA LMQHCNPPQR  
RFPLEKGVAP PWWPTGTEEW WPELGLPKDQ GPPPYKKPHD LKKAWKVGVL  
TAVIKHMSPD IAKIRKLVRQ SKCLQDKMTA KESATWLAI NQEEALSRLK YPDSCIPAST  
GGSGSFIISD ISDYDVEGVD NERNVEVEEI KPLEANLFNM GAMGSRDRML  
MPPSLVPRIK GEVFETHSES IQKRRQSADE PHMTIDQKIY TCEFTQCPYN DYHHGFLDRT  
SRNNHQLNCP YRNNGSQGCV MPNFQINNDQ PAVFSLPFAQ STHPKPITSV  
KNQTQPQYNV SGLGLPDDGQ KMISDLMSFY DTNLQPNKSM SQGCLNVTED  
RNQQPEQQKF QLQLDDSFYN QGVGVMKGGN MPVNNPVFSS TEVHFDQCKA  
FDSPFDNPNP DNIAEFRFNS PFNIASVDYP MDPIPKQDVS MWYL\*

> Citrus sinensis (orange1.1g007173m)

MGIFEEMGFC GNLEFFSALP GEGEAVMGHE METAVEEDCS DEEVDVDELE  
RRMWRDRLLL KRLKEQNKSK EGVDSAKHRQ SQEQARRKKM SRAQDGILKY  
MLKMMEVCKA QGFVYGIPE KGKPVGTASD NLRAWWKEKV RFDRNGPAAI  
AKYQADHAIP GKNEDFGTVV STPHTLQELQ DTTLGSLLSA LMQHCNPPQR  
RFPLEKGVAP PWWPTGTEEW WPELGLPKDQ GPPPYKKPHD LKKAWKVGVL  
TAVIKHMSPD IAKIRKLVRQ SKCLQDKMTA KESATWLAI NQEEALSRLK YPDSCIPAST  
GGSGSFIISD ISDYDVEGVD NERNVEVEEI KPLEANLFNM GAMGSRDRML  
MPPSLVPRIK GEVFETHSES IQKRRQSADE PHMTIDQKIY TCEFTQCPYN DYHHGFLDRT  
SRNNHQLNCP YRNNGSQGCV MPNFQINNDQ PAVFSLPFAQ STHPKPITSV  
KNQTQPQYNV SGLGLPDDGQ KMISDLMSFY DTNLQPNKSM SQGCLNVTED  
RNQQPEQQKF QLQLDDSFYN QGVGVMKGGN MPVNNPVFSS TEVHFDQCKA  
FDSPFDNPNP DNIAEFRFNS PFNIASVDYP MDPIPKQDVS MWYL\*

> Citrus sinensis (orange1.1g007180m)

MGIFEEMGFC GNLEFFSALP GEGEAVMGHE METAVEEDCS DEEVDVDELE  
RRMWRDRLLL KRLKEQNKSK EGVDSAKHRQ SQEQARRKKM SRAQDGILKY  
MLKMMEVCKA QGFVYGIPE KGKPVGTASD NLRAWWKEKV RFDRNGPAAI  
AKYQADHAIP GKNEDFGTVV STPHTLQELQ DTTLGSLLSA LMQHCNPPQR  
RFPLEKGVAP PWWPTGTEEW WPELGLPKDQ GPPPYKKPHD LKKAWKVGVL  
TAVIKHMSPD IAKIRKLVRQ SKCLQDKMTA KESATWLAI NQEEALSRLK YPDSCIPAST  
GGSGSFIISD ISDYDVEGVD NERNVEVEEI KPLEANLFNM GAMGSRDRML  
MPPSLVPRIK GEVFETHSES IQKRRQSADE PHMTIDQKIY TCEFTQCPYN DYHHGFLDRT  
SRNNHQLNCP YRNNGSQGCV MPNFQINNDQ PAVFSLPFAQ STHPKPITSV  
KNQTQPQYNV SGLGLPDDGQ KMISDLMSFY DTNLQPNKSM SQGCLNVTED  
RNQQPEQQKF QLQLDDSFYN QGVGVMKGGN MPVNNPVFSS TEVHFDQCKA  
FDSPFDNPNP DNIAEFRFNS PFNIASVDYP MDPIPKQDVS MWYL\*

> Citrus sinensis (orange1.1g007187m)

MGIFEEMGFC GNLEFFSALP GEGEAVMGHE METAVEEDCS DEEVDVDELE

RRMWRDRLLL KRLKEQNKSK EGVDSAKHRQ SEQARRKKM SRAQDGILKY  
 MLKMMEVCKA QGFVYGIIPE KGKPVGTGASD NLRAWWKEKV RFDRNGPAAI  
 AKYQADHAIP GKNEDFGTVV STPHTLQELQ DTTLGSLLSA LMQHCNPPQR  
 RFPLEKGVAP PWWPTGTEEW WPGLPKDQ GPPYKPPHD LKKAWKVGVL  
 TAVIKHMSPD IAKIRKLVRQ SKCLQDKMTA KESATWLAIINQEEALSRL YPDSCIPAST  
 GGSGSFIISD ISDYDVEGVD NERNVEVEEI KPLEANLFNM GAMGSRDRLM  
 MPPSLVPRIK GEVFETHSES IQRRQSADE PHMTIDQKIY TCEFTQCPYN DYHHGFLDRT  
 SRNNHQLNCP YRNNGSQGCV MPNFQINNDQ PAVFSLPFAQ STHPKPITSV  
 KNQTQPQYNV SGLGLPDDGQ KMISDLMSFY DTNLQPNKSM SQGCLNVTED  
 RNQQPEQQKF QLQLDDSFYN QGVGVMKGGN MPVNNPVFSS TEVHFDQCKA  
 FDSPFDNPNP DNIAEFRFNS PFNIASVDYP MDPIPKQDVS MWYL\*

> *Cannabis sativa* (PK01239.1)

MGFSGNFEFV SAPPREADEA LEHETEPVGE EDYSDEEMDV DELERRMWRD  
 RMLLRRLKEQ NKGKQGVDNA KQRQSSEQAR RKKMSRAQDG ILKYMLKMME  
 VCKAQGFVYG IIPEKGKPV GTGASDNLRAWW KEKVRFDRNG PAAIARYQAE  
 HSI PGQNE DC STMASTPHTL QELQDTTLGS LLSALMQHCD PPQRRFPLEK  
 GIAPPWWPTG SEEWWPQLGM PKDQGPPPYK KPHDLKKAWK VSVLTAVIKH  
 MSPDI AKIRK LVRQSKCLQD KMTAKESATW LAIINQEEAL ARKLYPDKCP  
 PMSATGNGSL VISETSYDV DGVDDEPNFE VEECKPRDIG RFNIGTIVPS RDRILMPQVA  
 SRIKGEIET NPDFVQKRKQ VGDEPQMMMD QKIFTCEYSQ CPYHDYRLGF  
 LDRTSRNNHQ MNCAYRPNSS QASQQTFGMP SFQINNDKPA VFSLPFSQPK  
 PPLAPQQINQ SSPFTGLDIP EDGQKMISDL MSLYDTNAQQ RNKGLNPGNH  
 SVPTNMENHT QPQQKYQFQM DDSFFSQGVM GGNMSEQANN ISSQQVVFPS  
 AEVQFDQCKA FDSPFDNPNP DNIADLRFSS PFNMAPVEFA VDSL PKQDVS LWYL

> *Azadirachta indica* (Neem\_3355\_f\_3)

MGFCGNVEFF SAPPGEAEV LGHETETAVE EDCSDDEV DV DELERRMWRD  
 RMLLRRLKEQ NKSREGVDSS KQRQSSEQAR RKKMSRAQDG ILKYMLKMME  
 VCKAQGFVYG IIPEKGKPV GTGASDNLRAWW KEKVRFDRNG PAAIAKYQAD  
 HAIPGKNEDF GTVVSTPHTL QELQDTTLGS LLSALMQHCD PPQRRFPLEK  
 GVAPPWWPSG KEEWWPQLGL PKDQGPPPYK KPHDLKKAWK VGVLTAVIKH  
 MSPDI AKIRK LVRQSKCLQD KMTAKESATW LAIINQEEAL SRKLYPDSCP  
 PASAGGSGSF IISDTSYDV EGV DNERNVE VEEYKPRDVN LFGLGAVGSR  
 DRQMMTPSLV PQIKGEVVET NADFIQKRKQ LNDEPHMMMD QKIYTCEFPQ  
 CPYND FRLGF LDRTSRNNHQ LNC PYHNNSP QGFGMADFQI NNDQPGVFSL  
 PFAQPTQSKP ATPAKNQTQP QFNVSGLGLP DDGQKMISDL MSFYDTNLQP  
 NKSMNPGGLN VMEEQNHQQE QKFQLQLDD SFYNQGVMMG GNMHGQSNMS  
 MNNSVFSSAE IRFDQCKAFD SPFDTNPGDN IADFRFNSPI NMASVDYAMD  
 PIPKQDVSMW YL

> *Humulus lupulus* (HL.SW.v1.0.G044476.1)

MGFCGNFDFI SCPPREGEET LEHEPEATVE EDYSDEEMDV DELERRMWRD  
 RMLLRRLKEQ SKGKQGV DNA KQRQSSEQAR RKKMSRAQDG ILKYMLKMME  
 VCKAQGFVYG IIPEKGKPV GTGASDNLRAWW KEKVRFDRNG PAAIAKYQAE  
 HSI PGQNE DC SSMAS TPHTL QELQDTTLGS LLSALMQHCD PPQRRFPLEK  
 GVAPPWWPTG SEEWWPQLGM PKDQGPPPYK KPHDLKKAWK VSVLTAVIKH

|            |            |            |             |            |
|------------|------------|------------|-------------|------------|
| MSPDIAKIRK | LVRQSKCLQD | KMTAKESATW | LAIINQEEAL  | ARKLYPDRC  |
| PMSASGNGSL | VISETSDYDV | DGVDDEPNFE | VEECKPRDVG  | RFNMGTIVPS |
| RDRMLMPQVA | PRIKGEIET  | SPDFVQKRKQ | LGDEPQMMMD  | QKIYTCEYSQ |
| CPYHDYRLGF | LDRTSRNNHQ | MNCAYRPNPS | QASQQTAFAMP | SFQISNDKPA |
| VFSLPFSQPK | PAAASQQMNQ | TSHFTGLDIP | EDGQKMISDL  | MSLYDSNAQQ |
| RNKALNPGNH | PAPTNMENHH | QPQQKYQFQM | DDSFFGQGVM  | GGNMSEQANI |
| SSQQAVYSSA | EVQFDQCKAF | DSPFDNNPND | NIADLRFASP  | FNMAPVEFSV |

DSLPGQDVSL WYL\*

>Unigene0042139

MFTFEDMEFCGDLDFFCAPPGEINELTPKTEPEAVAEDDYSDDEVVDDELERRLWRDKIRL  
KRLKELNKGKESVDVAKQRQSSEQARRKKMSRAQDGILKYMLKMMEVCKAQGFVYGII  
PENGKPVGTGASDNLREWWKDKVRFDRNGPAAIAKYKLENSSPGENRDICLAGLNTLQEL  
QDTTLGSLSSLMQHCPNPPQRRFPLEKGVPPWPNNGNEEWWTQLGLQKEQGPPPYKKP  
HDLKKAWKVGVLTAIVKHMSPDIKIRKLVRQSKCLQDKMTAKESATWLAIINREEVLVR  
ELYPDRCPLSANNTGCGPFVADDCWEYDVEGADNEPSFNNLQDLKPSNQNERFIGHQPL  
HLTKDDIITNSDYSRKRKPTRELTNTMPPKVYTCEFCQCPYSNIHHGFSERSMRDNHQMSC  
SYRRNSTEFLQNFNKIEVTPDVFSQQFVQPISEPSFNLSGLGVPEDGQNMINDLFSFYD  
GNVGKGPSACHIFEETDLAVSGSVFPQSEDQFEHEKLFSTPFEVNPSTDFNYMLGSSFNPS  
VEYSGEFSGLVKETYGKQDVSIWF

MYC protein sequence information

>Unigene0027167

MTDYRLPTMNLWAEDTASMMMDSTASFWPPQNSSSSSTSALESQQRLQAVIDGSSHNWT  
YAIFWQSGASGSLGWGDGFYKGDENKDNRKATSSPTEQHRKRVLRELNSMISGGLAQV  
DDNSAQADEEVTDTWFFLVSMQTQSFENGAGLPGQAFFSSTPIWLGSANRLAGSACERAR  
QAATFGLCTMACIPSPNGVVELGSTPEVPQTDLMAKIHVLFSSPRPDPEPSPAQNPTLAH  
NLMNFAEFKNSVYQQAFLNFNGDKRNILQIPEDDNDVKTRSPPSRGSNDEGMLSFTSG  
VVLPSISDNDSDIEASVVKETVPEPEKKPRKRGRKPANGREEPLNHVEAERQRREKLNQRF  
YALRAVVPNVSKMDKASLLGDAISYINELKAKVQTSEGKRNMERCHIEGLKRELANTDV  
TTHQISRLADVVDVKIIGWDAMIRVQSRKGNHPAAKLMVALRELDLELTHASVSVVNDL  
MIQQSTVRMGSRYYSQEQLRLALLAKIGDGR

> Nicotiana tabacum(XP\_016500373.1)

|            |            |            |            |            |
|------------|------------|------------|------------|------------|
| MTDYSLPTMN | LWNTSGTTDD | NVTMMEAFMS | SDLTSFWATS | NSTAVAAVTS |
| NSNHIPVNT  | TVLLPSSCAS | TVTAVAVDAS | KSMSFFNQET | LQQRLQTLID |
| GARETWYAI  | FWQSSAVDLT | SPFVLGWGDG | YKGEEDKAN  | RKLAVSSPAY |
| IAEQEHRKKV | LRELNSLISG | TQTGTDDAVD | EEVTDTEWFF | LISMTQSFDN |
| GSGLPQGALY | NSSPIWVAGA | EKLAASHCER | ARQAQGFGLQ | TMVCIPSANG |
| VVELGSTELI | IQSSDLMNKV | RVLNFNNDL  | GSGSWAVQPE | SDPSALWLTD |
| PSSAAVQVKD | LNTVEANSVP | SSNSSKQVVF | DNENNGHSCD | NQQQHHSRQQ |
| TQGGFTRELN | FSEFGFDGSS | NNRNGNSSLS | CKPESGEILN | FGDSTKKSAN |
| GNLFSGQSHF | GAGEENKKKK | RSPASRGSE  | EGMLSFVSGT | ILPAASGAMK |

|            |            |            |            |            |
|------------|------------|------------|------------|------------|
| SSGCVGEDSD | HSDLEASVVK | EAESSRVVEP | EKRPKKRGRK | PANGREEPLN |
| HVEAERQRRE | KLNQRFYALR | AVVPNVSKMD | KASLLGDAIS | YINELKLKLQ |
| TTETDREDLK | SQIEDLKKEL | DSKDSRRPGP | PPPNQDHKMS | SHTGSKIVDV |
| DIDVKIIGWD | AMIRIQCNKK | NHPAARLMVA | LKELDLDVHH | ASVSVVNDLM |
| IQQATVKMGS | RLYTEEQLRI | ALTSRVAETR |            |            |

> *Nicotiana tabacum*(XP\_016502760.1)

|            |             |            |             |            |
|------------|-------------|------------|-------------|------------|
| MTDYSLPTMN | LWNTSGTTDD  | NVSMMEFMS  | SDLTSFWATS  | NSTTAAVTSN |
| SNLIPVNTLT | VLLPSSCAST  | VTAVAVDASK | SMSFFNQETL  | QQRLQTLIDG |
| ARETWTYAIF | WQSSVVDLSS  | PFVLGWGDGY | YKGEEDKANR  | KLAVSSPAYI |
| AEQEHKKVL  | RELNSLISGT  | QTGTDDAVDE | EVTDTTEWFFL | ISMTQSFVNG |
| SGLPGQALYN | SSPIWVAGAE  | KLAASHCERA | RQAQGFGLQT  | MVCIPSANGV |
| VELGSTELII | QSCDLMNKVR  | VLFNFNNDLG | SGSWAVQPES  | DPSALWLTD  |
| SSAAVEVQDL | NTVKANSVPS  | SNSSKQVVD  | NENNGHSSDN  | QQQHSKHET  |
| QGFFTRELFN | SEFGFDGSSN  | NRNGNSSLSC | KPESGEILNF  | GDSTKKSANG |
| NLFSGQSHFG | AGEENKNKKR  | SPASRGSENE | GMLSFVSGTI  | LPAASGAMKS |
| SGGVGEDSDH | SDLEASVVEKE | AESSRVVEPE | KRPKKRGRKP  | ANGREEPLNH |
| VEAERQRREK | LNQRFYALRA  | VVPNVSKMDK | ASLLGDAISY  | INELKLKLQN |
| TETDREELKS | QIEDLKKELV  | SKDSRRPGPP | PSNHDHKMSS  | HTGSKIVDVD |
| IDVKIIGWDA | MIRIQCNKKN  | HPAARLMVAL | KELDLDVHHA  | SVSVVNDLMI |
| QQATVKMGSR | LYTEEQLRIA  | LTSRVAETR  |             |            |

> *Nicotiana tabacum*(XP\_016441449.1)

|            |            |            |            |            |
|------------|------------|------------|------------|------------|
| MTDYRIPTMT | NIWSNTTSDD | NMMEAFLSSD | PSSFWAGTNT | PTPRSSVSPA |
| PAPVTGIAGD | PLKSMPYFNQ | ESLQQRLQTL | IDGAREAWTY | AIFWQSSVVD |
| FVSPSVLGWG | DGYKGEEDK  | NKRKTAAFSP | DFITEQEHRK | KVLRELNSLI |
| SGTQTGGEND | AVDEEVTDT  | WFFLISMTQS | FVNGSGLPGL | AMYSSSPIWV |
| TGRERLAASH | CERARQAQGF | GLQTMVCIPS | ANGVVELGST | ELIFQSADLM |
| NKVKILDFDN | IDMGATTGSG | SGSCAIQAEP | DPSTLWLTD  | PSSVVEVKDS |
| SNTVPSSNSS | KQLVFGNENS | ENVNQNSQQT | QGFFTRELFN | SEYGFDSNT  |
| RSGNGNVNSS | RSCKPESGEI | LNFGDSTKRN | ASSANGSLFS | GQSQFGPGA  |
| EENKNKNKKR | SPASRGSENE | GMLSFVSGVI | LPSSNTGKSG | GGGDSDHSDL |
| EASVVKEADS | SRVVDPEKRP | RKRGRKPANG | REEPLNHVEA | ERQRREKLNQ |
| RFYALRAVVP | NVSKMDKASL | LGDAIAFINE | LKSKVQNSDS | DKDELNRNIE |
| SLRNELANKG | SNYTGPPPPN | QDLKIVMDI  | DVKVIGWDAM | IRIQSNKKNH |
| PAARLMAALM | ELDLVDVHHA | VSVVNELMIQ | QATVKMGSR  | YTQEQLRISL |
| TSRIAESR   |            |            |            |            |

> *Nicotiana tabacum*(XP\_016499262.1)

|             |            |            |            |            |
|-------------|------------|------------|------------|------------|
| MTDYRIPTMT  | NIWSNTTSDD | NMMEAFLSSD | PSSFWPGTTT | TPTPRSSVSP |
| APAPVTGIAG  | DPLKSMPYFN | QESLQQRLQT | LIDGARKGWT | YAIFWQSSVV |
| DFASPSVLGW  | GDGYKGEED  | KNKRKTASFS | PDFITEQAHR | KKVLRELNSL |
| ISGTQTGGEN  | DAVDEEVTDT | EWFFLISMTQ | SFVNGSGLPG | LAMYSSSPIW |
| VTGTERLAVS  | HCERARQAQG | FGLQTIVCIP | SANGVVELGS | TELIQTADL  |
| MNKVKVLFNF  | NIDMGATTGS | GSGSCAIQAE | PDPSALWLTD | PASSVVEVKD |
| SSNTVPSRNT  | SKQLVFGNEN | SENGNQNSQQ | TQGFFTRELN | FSEYGFDSN  |
| TRYGNNGNANS | SRCKPESGEI | LNFGDSTKR  | SACSANGSLF | SGQSQFGPGA |
| AEENKNKNKK  | RSPASRGSD  | EGILSFVSGV | ILPSSNTGKS | GGGDSDQSD  |
| LEASVVKEAD  | SSRVVDPEKK |            |            |            |

PRKRGRKPAN      GREEPLNHVE    AERQRREKLN    QRFYALRAVV    PNVSKMDKAS  
 LLGDAIAFIN    ELKSKVQNSD      SDKEDLRNQI    ESLRNELANK    GSNYTGPPPS  
 NQELKIVDMD    IDVKVIGWDA    MIRIQSNKKN    HPAARLMTAL    MELDLDVHHA  
 SVSVVNELMI QQATVKMGSR LYTQEQLRIS LTSRIAESR

> *Arabidopsis thaliana*(AT4G17880.1)

MSPTNVQVTD    YHLNQSKTDT    TNLWSTDDDA    SVMEAFIGGG    SDHSSLFPPL  
 PPPPLPQVNE    DNLQQRLQAL    IEGANENWTY    AVFWQSSHGF    AGEDNNNNNT  
 VLLGWGDGYG    KGEEEKSRKK      KSNPASAAEQ    EHRKRVIREL    NSLISGGVGG  
 GDEAGDEEVT    DTEWFFLVSM    TQSFVKGTGL    PGQAFSNSDT    IWLSGSNALA  
 GSSCERARQG    QIYGLQTMVC    VATENGVEL    GSSEIIHQSS    DLVDKVDTFE  
 NFNNGGGEFG    SWAFNLNPDQ    GENDPGLWIS    EPNGVDSGLV    AAPVMNNGGN  
 DSTSNSDSQP    ISKLCNGSSV    ENPNPKVLKS    CEMVNFKNGI    ENGQEESSN  
 KKRSPVSNNE    EGMLSFTSVL    PCDSNHSDLE    ASVAKEAESN    RVVVEPEKKP  
 RKRGRKPANG    REEPLNHVEA    ERQRREKLNQ    RFYSLRAVVP    NVSKMDKASL  
 LGDAISYISE    LKSKLQKAES    DKEELQKQID    VMNKEAGNAK    SSVKDRKCLN  
 QESSVLIEME    VDVKIIGWDA    MIRIQCSKRN    HPGAKFMEAL    KELDLEVNHA  
 SLSVVDLMI QQATVKMGNG FFTQDQLKVA LTEKVGECF

> *Arabidopsis thaliana*(AT1G32640.1)

MTDYRLQPTM    NLWTTDDNAS    MMEAFMSSSD    ISTLWPPAST    TTTTATTETT  
 PTPAMEIPAQ    AGFNQETLQQ    RLQALIEGTH    EGWTYAIFWQ    PSYDFSGASV  
 LGWGDGYKYG    EEDKANPRRR    SSSPPFSTPA    DQEYRKKVLR    ELNSLISGGV  
 APSDDAVDEE    VTDTEWFFLV    SMTQSFACGA    GLAGKAFATG    NAVWVSGSDQ  
 LSGSGCERAK    QGGVFGMHTI    ACIPSANGVV    EVGSTEPIRQ    SSDLINKVRI  
 LFNFDGGAGD    LSGLNWNLDL    DQGENDPSMW    INDPIGTPGS    NEPGNGAPSS  
 SSQLFKSIQ FENGSSSTIT ENPNLDPTPS PVHSQTQNPV FNNTFSRELN FSTSSSTLVK  
 PRSGEILNFG    DEGKRSSGNP    DPSSYSQGTQ    FENKRKRSMV    LNEKDVLSFG  
 DKTAGESDHS    DLEASVVKEV    AVEKRPPKRG    RKPANGREEP    LNHVEAERQR  
 REKLNQRFYA    LRAVVPNVSK    MDKASLLGDA    IAYINELKSK    VVKTESEKLQ  
 IKNQLEEVKL    ELAGRKASAS    GGDMSSSCSS    IKPVGMEIEV    KIIGWDAMIR  
 VESSKRNHPA    ARLMSALMDL    ELEVNHASMS    VVNDLMIQQA    TVKMGFRIYT  
 QEQLRASLIS KIG

> *Nelumbo nucifera*(NNU\_019107-RA)

MTEYRLPVMN    LWTDDNASMM    EAFMASDLSQ    FSWAPTASAS    TTTTATDPSR  
 TTNQSQTSMF    FNQDTLQQRL    QTLIEGARES    WTYAIFWQSS    VDMSGASLLG  
 WGDGYKYGEE    DKMKRRVTVS    PAEQEHRKKV    LRELNSLISG    VPASADEPVD  
 EEVTDTEWFF    LVSMTQSFIN    GSGLPGQAFF    ASSPVWLAGG    ERLASSSCER  
 ARQGQIFGLR    TMVCIPSANG    VVELGSTELI    FHSSDLMNKV    RVLNFNNNNN  
 SDMGPWSTTI    SVQTQHQNH    HQQTQSFFT    RELNFSEFGY    EGSSARNGSA  
 QSCKPESGEI    LNYGERKKNS    CSANGNLFSN    NSQQFVADDK    KKRSASSKGG  
 NNEGMLSFTS    GVVLPSSCVV    KSSGGTADSD    QSDLDASVRE    AESSRVGEPE  
 KRPRKRGRKP    ANGREEPLNH    VEAERQRREK    LNQRFYALRA    VVPNVSKMDK  
 ASLLGDAIAY    INELRTKLQA    AESNKEGLQS    QVDSLKKELA    ASRYSGSPQ  
 ADQDLKISNH    QVSKLLDMEI    EVKILGWEAM    IRIQCNKKNH    PAARLMTALK  
 ELDLDVHYAS VSVVKDLMIQ QATVKMSSRV YTQEQLRIAL SSKVGDAR

> *Actinidia chinensis*(Achn084621)

MDYRLQPMNL WTDDNTSMME AFMTSDLTTL WPPPPSTAA AAPLPPLPPF  
NQDSLQQHLQ ALIEGDRESW TYAIFWQSSV VDFNGGSM LG WGDGYK GEE  
DKGKRKTASA SAVEQEHRKK VLRELNSMIS GAVSPADDAV DEEVTDT EWF  
FLVSMTQSFV NGSGLPQAL FSSTPIWVAG AERLAGSNCE RARQQQVFGL  
QTIVCIPSTN GVVELGSTEL IFQSSDLMNR VRVLF SFNGG EMGSWPAPAD  
QGENDPSAFY LTDPSPVVE IRDSINTISA TTAIPNSNQK LTKQTT FESS STLTENPSAS  
HVHNYNPHQQ NQQQQQEANA QSGD DNKKR SPTS RGSNEE GMLSFTSGVI  
LPASRAVKSS GGGGSDHSD LEASVVREAE SSRVVDPEKR PRKRGRKPAN  
GREEPLNHVE AERQRREKLN QRFYALRAVV PNVSKMDKAS LLGDAISYIN  
ELKSKLQGA E SDKEEMRNQM ETMKKDLACK ESRHQPPPNQ DLKMLNHHGS  
KLIDIDIDVK IIEWDAMIRI QCSKKNHPAA RLMLALKELD LDVHHASVSV  
VNDLMSQQAT VKMGSRLYTQ EQLRIALMAK VADAR\*

> *Gossypium arboreum*(Cotton\_A\_07316\_BGI-A2\_v1.0)

MKDYRLAPTM NLWTDDNAPV MEAFMSSDLS SLWPPPLSSA STSTPAASAA  
GGGGGGGGHD LSISFLAQSQ PSVSLNQET LQRLQALIE GGRDCW TYAI  
FWQSSYDYS G ATVLGWGDGY YKGEEDKKG KSKAYSSSVA EQEHRKKVLR  
ELNSLISGST ATADDAVDEE VTDTEWFFLV SMTQSFVTGS GLPGQALYNS  
SPVWVAGSGR LASSMCERAR QGQLFGLQTI VCIPSANGVV ELGSTELITQ  
SSDLMNKVRI LFNFNNGIEA GSWSVSNNTA DQGENDPSSL WISEPNNGVE  
PKDNNNNGNH NPSIQDPSTS SLTENPSSIH GGNQQQQPQG QSFR LNFSDY  
GFDGNSSVKN GKFS AHLLKP ES GEILNFGE SKKSGNGNLF SANSQLVVEE  
NKKKRSPTSR GSNEDGMISF TSGAVLPCSG VAKPGGCARD SDNSDIEASI VKEADSSRVV  
EPEKRPRKRG RKPANGREEP LNHVEAERQR REKLNQKFYA LRAVVPNVSK  
MDKASLLGDA ISYINELRTK VQDADSEKEE LLKQLDEMKK QLASKESCSM  
APPPPDQDRN MSNKLIELDI DVKIIGLDAM IRIQCSKKNH PAARLMTALK  
ELDL DVHHAS VSVVNDLMIQ QASVKMGSRF YTQEQLRIAL ASKVG DAR

> *Solanum pennellii*(Sopen08g001070.1)

MTDYRLWSNS NTTNTCDDNM MMDSFLSSDP SSFWPASTPN RPTPVNGVGE  
TMPFFNQESL QQRLQALIDG ARESWAY AIF WQSSVVD FAS QTVLGWGDGY  
YKGEEDKNKR RGSSSSAANF VAEQEHRKKV LRELNSLISG VQASAGNGTD  
DAVDEEVTDT EWFFLISMTQ SFVNGNGLPG LAMYSSSPIW VTGTEKLAAS  
QCERARQAQG FGLQTIVCIP SANGVVELGS TELIFQSSDL MNKV KYLFNF  
NIDMGSVTGS GSGSGSCAVH PEPDPSALWL TDPSSSVVEP KDSLINSSSR  
DVQLVYG NEN SENQQQQHCQ GFFTKE LNFS GYGFDGSSNR NKNGISCKPE  
SREILNFGDS SKRFSGQSQL GPGPGLMEEN KNKKRSLGSR GNNEEGMLSF  
VSGVILPTST MGKSGSDHS DLEASVVKEA VVEPEKKPRK RGRKPANGRE  
EPLNHVEAER QRREKLNQRF YALRAVVPNV SKMDKASLLG DAIAYINELK  
SKVQNSDL DK EELRSQIECL RKELTNKGSS NYSASPPLSQ DVKIVDMDID  
VKVIGWDAMI RIQCSKKNHP AARLMAALKD LDL DVHHASV SVVNDLMIQQ  
ATVKMGSRLY AQEQLRIALT SKIAESR

> *Solanum melongena*(Sme2.5\_02104.1\_g00004.1)

MELTEYRLWS SNTNTINSSD DNMMDAFLSS DPPSFWPGGN TTAPSNRTSI  
SPAPENGGGD TMPFFSQESL QQRLQTLIDG AHESWAY AIF WQSSSVVDF

|            |            |            |            |            |
|------------|------------|------------|------------|------------|
| ASPSVLGWGD | GYKGEEDKN  | KRKTNSSSPD | FLAEQEHRKK | VLRELNSLIS |
| GVQTAVGGAD | DSVDEEVTDT | EWFFLISMTQ | SFVNGNGLPG | LAMYSSSPIW |
| VTGAEGLAAS | QCERARQAQG | FGLQTIVCIP | SANGVVELGS | TELIQSSDL  |
| MNKVKYLFNF | NIDMGSVTGS | GSGSGVVHPE | PDPSALWLTD | PSSSVVEANV |
| SKQLVFGNEN | SENGAKHSQQ | TQGFFTRELN | FSSYGFDGSS | TRNKNGKTSV |
| SCKPESGEIL | NFGDGNKRS  | SLFSGQSKFG | PRPGLVEENK | NKKRGNNEEG |
| ILSFVSGVIL | PTSTTEKSGG | GGSDHSDLE  | ASVVKETVVE | PEKKPRKRGR |
| KPANGREEPL | NHVEAERQRR | EKLNQRFYAL | RAVVPNVSKM | DKASLLGDAI |
| AYINDLKLKV | QNSESDKEDL | RSQIECLRKE | LANKGSSNYP | GPLPSNQDLK |
| IVDMDIDVKV | IGWDAMIRIQ | CSKKNHPAAR | LMAALKDLDL | DVHHASVSVV |
| NDIMIQQATV | KMGSRLYAQE | QLRIALTSKI | AESR       |            |

> *Linum usitatissimum*(Lus10030970)

|            |            |            |            |            |
|------------|------------|------------|------------|------------|
| MTDYRLQSPA | TMNLWTDDNA | SVMEAFMNSD | LTSLWPPPPL | PPPPPPPHS  |
| SASTSAGGGG | ATVNQDSLQQ | RLQALIDGAR | ENWTYAIFWQ | SSYDFSGASS |
| SSSSSTVLAW | GDGYKGDQ   | KGNTTTSST  | RNYTPAEQQH | RKKVLRELNS |
| LISGPNSASD | DAVDEEVTDT | EWFFLVSMQ  | SFVNGVGLPG | QAFFNGFPAW |
| LVGSDRMAAA | SCERAKQGQV | FGLQTMVCIP | SQNGVVELGS | SELIPQSSDL |
| MNKVRVLFNF | STVDVSTVWP | QSNPDQGEN  | PSSLWIADPT | RLDPPQNGAS |
| YPSSSSLTET | PAGIQNTQS  | FFTRELNFGN | GSFGGNQPKP | ESGEILNFGD |
| NNSKRSSSNP | NLNHHNPNPQ | LEDSTNKNK  | KKKPSPTSRG | SNNDEGMLS  |
| TSGLVPSSGS | VKSNGGGMVD | SDVDQSDLEP | SVIKEVVVAE | PEKRPRKRGR |
| KPANGREEPL | NHVEAERQRR | EKLNQRFYAL | RAVVPNVSKM | DKASLLGDAI |
| SYIKELRSKL | QSTESSKEEL | ERQVESIRKQ | QPEHQEYNKK | AGSNEFGGGR |
| GGKTKAIEMD | IDVKIIGWDA | MIRIQCSKEN | HPAARLMAGL | KELDLDVHHA |
| SVSVVNDLMI | QQATVKMGS  | FYTQEELRLA | LSNKVGGDTR | *          |

> *Camelina sativa*(Csa17g053090.1)

|             |            |             |              |               |
|-------------|------------|-------------|--------------|---------------|
| MTDYRLQPTM  | NLWTTDDNAS | MMEAFMSSSD  | ISTLWPPAAT   | TTTTTTTTTT    |
| TTTAPATAMD  | IPAPAGFNQE | TLQQLRLQALI | EGTHEGWTYA   | IFWQPSYDFS    |
| GASVLGWGDG  | YKGEEDKAK  | PRQRSSSPF   | STPADQEYRK   | KVLRELNSLI    |
| SGGVAPSDDA  | VDEEVTDEW  | FFLVSMQSF   | ACGAGLAGRA   | FSTGNAVWVS    |
| GSDQLSGSGC  | ERAKQGGVFG | MQTIACIPSA  | NGVVEVGSTE   | QIRQSSDLIN    |
| KVRVLFNFDG  | GAGDLSGVSI | GTLTRIAKT   | TRLCGLMTRL   | EHLGLTNRFE    |
| NGSSSTITEN  | PNPDPTSPV  | HSQTQNP     | KFSNNFSREL   | NFSTSSSTLVKPR |
| SGEILSFGDD  | GKRGSGNPD  | SSYSQTQFE   | NKRKKSPNED   | KVLSFGDKTT    |
| GSDHSDLEA   | SVVKEVAVEK | RPKKRGRKPA  | NGREEPLNHV   | EAERQRREKL    |
| NQRFYALRAV  | VPNVSKMDKA | SLLGDAIAYI  | NELKSKVVK    | ESEKLQIKNQ    |
| LEEVLKLELAG | RKASAGCGDM | SSSTCSSIKP  | VGMEIEVKII   | GWDAMIRVES    |
| SKRNHPAARL  | MAALMDLELE | VNHASMSV    | VNDLMIQQATVK | MGFRIYTQEQ    |
| LRASLISKIG  | *          |             |              |               |

> *Tarenaya hassleriana*(XP\_010538366.1)

|            |             |            |            |            |
|------------|-------------|------------|------------|------------|
| MTDYRLPATM | NLLTTDDNAS  | MMEAFINSSD | LSDLWPPPPA | APASQPQNAP |
| AIVPPGLCQE | TLQQLRLHALI | EGAHEGWTYA | IFWQLSYDFS | GAAVLGWGDG |
| YYKGEEDKAC | PRPRATTSFS  | SSADQEHRKK | VLRELNSLIS | GGALPSDDAV |
| DEEVTDEWF  | FLVSMTQSFA  | SGSGLAGKAF | STSNPVWVAG | SDQLSGSDCE |
| RAGQGGVFGL | QTIACIPSAN  | GVVELGSTEI | IRQSSDLMNK | VRILFNLDGG |
| QWSGDPDQGE |             |            |            |            |

NHPSMWISDP ICGEPGTNEP GHGAPSSNSQ LFSKSLLMEN GSSSPITENP NPTLVHSLTQ  
NLKYNDFSRE INFSTLNSNL ARPRSGEILN FGEDAKRCPG NPNPGLYSQG  
SQFLTSDIKR KTKSIGITED TVLSFGVAGD KSGDSDHSDL EASVVKEAVP  
EKPRKRGRK PANGREEPLN HVEAERQRRE KLNQRFYALR AVVPNVSKMD  
KASLLGDAIA YINELKSKLQ KVESEKTQVE CQVESLKGEL AGQNANAGVV  
GDVGDSYSSV SKRTGVEIEV KIIGWDAMIR IESSKRNYPA ARLMSALRDL  
ELEVNHASMS VVNDLMVQQA TVKMGFRIYT QDQLRAGLIS KFG

> Tarenaya hassleriana(XP\_010540785.1)

MAENRIPATM NLWTTDDNAS MMEAFMSSSD FSALWPPAVQ PQNPAASAGF  
NQETLQQRQLQ ALIEGAPKSW TYAIFWQLSY DFSGAAVLGW GDGYKGEED  
KAQPSRRSPR TFFSSPAEQE HRKRILSELN SLISGGAVPS DDAVNEEVTDTWFFLVSM  
TSFSPSGSLA GKAYSTSNPV WVGSDQLSS SGCERARQGG VFGLQTIACI  
PSANGVVELG STEIRQSSG LVNKVRTLK FDGGDLSEHH WSHDPDQGEN  
DPSTWISDPT DLGPGTNEG HGAPSSSSQL FSSTITENLN PNPVYSQTQN PKYNNFSREI  
NCWTTNSILA MPRSGEILSF GEDAKRSGP KPGPYSCQTQ FLSSDSKRKT  
TKSIRINEDG VLSFGFTGEK FGSDHSDLE ASVVKEAAPE KRPRKRGRKP  
ANGREEPLNH VEAERQRREK LNQRFYALRA VVPNVSKMDK ASLLGDAISY  
INELKSKLQR AESDKTQFQC QLENLKRELA GRHANANAGI LDASDSSAV  
SKPIGMEIEV KIIWDAMIR IESSKRNHPA ARLMTALKEL ELEVNHASVS  
VVNDLMIQQA TVKLGFRPYT QEQLKAALIS KIG

> Tarenaya hassleriana(XP\_010540787.1)

MAENRIPATM NLWTTDDNAS MMEAFMSSSD FSALWPPAVQ PQNPAASAGF  
NQETLQQRQLQ ALIEGAPKSW TYAIFWQLSY DFSGAAVLGW GDGYKGEED  
KAQPSRRSPR TFFSSPAEQE HRKRILSELN SLISGGAVPS DDAVNEEVTDTWFFLVSM  
TSFSPSGSLA GKAYSTSNPV WVGSDQLSS SGCERARQGG VFGLQTIACI  
PSANGVVELG STEIRQSSG LVNKVRTLK FDGGDLSEHH WSHDPDQGEN  
DPSTWISDPT DLGPGTNEG HGAPSSSSQL FSSTITENLN PNPVYSQTQN PKYNNFSREI  
NCWTTNSILA MPRSGEILSF GEDAKRSGP KPGPYSCQTQ FLSSDSKRKT  
TKSIRINEDG VLSFGFTGEK FGSDHSDLE ASVVKEAAPE KRPRKRGRKP  
ANGREEPLNH VEAERQRREK LNQRFYALRA VVPNVSKMDK ASLLGDAISY  
INELKSKLQR AESDKTQFQC QLENLKRELA GRHANANAGI LDASDSSAV  
SKPIGMEIEV KIIWDAMIR IESSKRNHPA ARLMTALKEL ELEVNHASVS  
VVNDLMIQQA TVKLGFRPYT QEQLKAALIS KIG

> Capsella grandiflora(Cagra.3356s0080.1.p)

MSPTSVQITD YHLNQSTNGT TNLWSNDDDA SVMEAFIGGS DQSSLFPPSP PPPAQSQFNE  
DTLQQLQAL IEGANESWTY AVFWQSSYDF AGEDDGGGES RNTAVLWGD  
GYKGEENS RKKKSNPASA AEQEHRRVI RELNALISGG GGVVNNGGGS  
DEAGDEEVD TEFVFLVSM TSFVSGTGLP GQAFNSNTI WLSGSNALAG  
SSCERARQGG IYGLQTMVCV PCENGVELG SSEIHHQSSD LVDKVDTFN  
FNNGGGESGS WAFNLNPDQG ENDPGLWIGE PDSVGVELGL VAPVMNNTGN  
NSASNSDSQP ISKLCNGSSV EDPKPQVTKS SEMVSFKNGT DENGFSGQSR  
FMEEDSNKKR SPVSNNDGEM LSFTSVLPRP AKSGDSNHSD LEASVVKEAE  
SNRTVVEPEK KPRKRGRKPA NGREEPLNHV EAERQRREKL NQRFYSLRAV  
VPNVSKMDKA SLLGDAISYI NELKSKLQKV ESDKEELQKV IEGMSKEAAN



EKSSVKERKC ANQESGVSIE MEVDVKIIGW DAMIRVQCSK RNHPGAKFME  
ALKELDLEVN HASLSVVNDL MIQQATVKMG REFFTQDQLK VALMEKVGEC L\*

>Arabidopsis lyrata(493087)

MSPTNVQLTD YHLNQSTNGT TNLWSTDDDA SVMEAFIGGS DHSSLFPPLP PVPVPPVND  
NLQQRLQALI EGANESWTYA VFWQSSHDFG GEDDGVRTNN NNTTLLGWGD  
GYYKGEEEEKS RKKKSNPASA AEQEHRKRVI RELNSLISGG GGGGGDEAGD  
EEVTDTEWFF LVSMQTQSFVN GIGLPGQAFS NSNTIWLSGS NALAGSSCER  
ARQGQIYGLQ TMVCVATGNG VVELGSSEII HQSSDLVDKV DTFNNGGGES  
GSWAFNLNPD QGENDPGLWI SEPNNNGDES GLVAAPVMMN NGGNDSTSNS  
DSQPISKLCN GSSVENQVLK SGEMVRVKNG MENGFSGQSR FMEEDKRSPV  
SNNEEGMLSF TSVLPRPAKS GDSNHSDLEA SVAKEAESNR FVVEPEKKPR  
KRGRKPANGR EEPLNHVEAE RQRREKLNQR FYSLRAVVPN VSKMDKASLL  
GDAISYINEL KSKLQKAESD KEELQKQFDG MIKEAGNSKS SVKDRRCLNQ  
ESSVLIEMEV DVKIIGWDAM IRIQCSKRNH PGAKFMEALK ELDLEVNHAS  
LSVVNDLMIQ QATVKMGNGF FTQDQLKVAL MEKVGEC\*

> Brassica napus (GSBRNA2T00131278001)

MSSTNVQLTD HHLNQSTNGT NLWSTTEDNA SVMEPLIGSE HSSLWPQPPL  
TPPPPHVTEG TLQQRLQALI EGARESWTYA VFWQLSHDFA GEDISNTAAL  
LSWGDGYYKG EEERKSRKRK PNPVSAAEQE HRKRVIRELN SLISGGGGGG  
GTAGDEDVSD TEWFFLVSMQ QSFANGSGLP GRAFSSSRTI WLSGSNALAG  
SSCERARQGQ VYGLETMVC I PTQNGVVELG SLEIIHQSS E LVDKVN SFFS  
FNGGGGGGGES GSWAFNLNPD QGENDPATWI NEPNVTGIEP VLGAPATSNS  
DSQTASKLCN GSSVEHPKQQ QNPQISSSGF VEGDSNKKKR CLVSDKEEEM LSFTSVLPLP  
TKSNDNSRSD LEASVVKEAE SGRIAAEPEK KPRKRGRKPA NGREEPLNHV  
EAERQRREKL NQRFYSLRAV VPNVSKMDKA SLLGDAISYI NELKAKLQKA  
EADKEELQKQ IDGMSKEVGD GNVKSSVKDQ KCLEQDSGVS VEVEIDVKII  
GWDAMIRIQG GKKDHPGAKF MEALKELELE VNHASLSVVN EFMIQQATVK  
MGNQFFTQDQ LKAALMERV\*

> Brassica oleracea(XP\_013605597.1)

MSSTNVQLTD HHLNQSTNGT NLWSTIEDNA SVMEPLIGSE HSSLWPQPPL TTPPPPHVTEG  
TLQQRLQALI EGARESWTYA VFWQLSHDFA GEDISNTAAL LTWGDGYYKG  
EEERKSRKRK PNPVSAAEQE HRKRVIRELN SLISGGGGTV SSSGGSSDEA  
GDEDVSDTEW FFLVSMTQSF VNGSGLPGRA FSSSRTIWL S GSNALAGSSC  
ERARQGQVYG LETMVC IPTQ NGVVELGSLE IIHQSSDLVE KVNSFFSFNG  
GGGGGESGSW EFNLNPDQGE NDSATWINEP IVTGIEPVLG APATSNSDSQ  
TASKLCNGSS VEHPKQQQNP QISSSGFVEG DSNKKKRCLV SDKEEEMLSF  
TSVLPLPTKS NDSNRSDLEA SVVKEAESGR IVAETEKKPR KRGRKPANGR  
EEPLNHVEAE RQRREKLNQR FYSLRAVVPN VSKMDKASLL GDAISYINEL  
KAKLQKAEAD KEELQKQIDG MSKEVGDGNV KSLVKDQKCL DQDSGVSIEV  
EIDVKIIGWD AMIRIQCAKK NHPGAKFMEA LKELELEVNH ASLSVVNEFM  
IQQATVKMGNG QFFTQDQLKA ALMERV

> Brassica napus(GSBRNA2T00080269001)

MSSTNVQLTD HHLNQSTNGT NLWSTTEDNA SVMEPLIGSE HSSLWHQPPL  
TLPPPHVTEG TLQQRLQALI EGARESWTYA VFWQLSHDFA GEDISNTAAL

LSWGDGYK EEERKSRKRK PNPVSAAEQE HRKRVIRELN SLISGGGGTV  
SSSGSSDEA GDEDVSDTEW FFLVSMTQSF VNGSGLPGRA FSSSRTIWL  
GSNALAGSSC ERARQGQVYG LETMVCIPTQ NGVVELGSLE IIHQSSDLVE  
KVNSFFSFNG GGGGGESGSW EFNLNPDQGE NDPATWINEP NVTGIEPVLG  
APATSNDSQ TASKLCNGSS VEHPKQQQNP QISSSGFVEG DSNKKKRCLV SDKEEEMLSF  
TSVLPLPTKS NDSNRSDLEA SVVKEAESGR IVAEPEKKPR KRGRKPANGR  
EEPLNHVEAE RQRREKLNQR FYSLRAVVPN VSKMDKASLL GDAISYINEL  
KAKLQKAEAD KEELQKQIGG MSKEVGDGNV KSSVKDQKCL DQDSGVSIEV  
EIDVKIIGWD AMIRIQCGKN NHPGAKFMEA LKELELEVNH ASLSVVNEFM  
IQQATVKMGN QFFTQDQLKA ALMERV\*

> *Gossypium hirsutum*(Gh\_D12G2074)

MTDYRFASTM NLWTDDNASV MEAFMSSDLS ALWQPPPQSS ASTSTPAVVA  
SSAAAAASGA PDLLKSSVAP QSHPSVALFN QETLQQRLLQ LIEGAHECWT  
YAIFWQSSYD YSGSAVLGWG DGYKGEEDK GKRKLKTSSV VAEQEHRKKV  
LRELNSLISG STAPTDDAVD EEVTDTEWFF LVSMQTQSFVN GGGLPGQALF  
NSTPVWVVG ERLASSTCER VRQGQVFLQ TMVCIPSANG VVELGSTELI  
TQSSGLMNKV RVLNFNNSI EAGYLSMCNN IADEGENDPS SLWISDPNSG  
VEYKESHNNN QNQIEKSIQ FHDNPSSSSL TENPSSIQQQ HSQNFGLNFS DYGFDRSNSV  
RNGNSSHLFK PESEETLNF ESKRSGNVVE ENKKKTSPTS RGSHEGMLS FSSAVFLPSS  
GMMKSSGGAG DSDNSDIEAS VVKEAECVKP LEPEKKPRKR GRKPANGREE  
PLNHVEAERQ RREKLNQRFY ALRAVVPNV KMDKASLLGD AISYINELST  
KVQNADLEKQ ELQKQLEAMK KELAKKDSCP QNPKTSNHLG NRLIELETEV  
KVIGWDAMIR IQCKRKNHPA ARLMAALKEL NLDVQHASVT VVNDLMIQQA  
TVKMGNPFYT QEQLRLALIS KIGSEI

> *Populus trichocarpa*(Potri.003G092200.2)

MTDYRLPPTM NLWTDDNGSV MEAFMNSSDL SSLWAPPQT SASFSTPAAA  
AAAQPSDKTM LNQETLQQR QALIEGARES WTYAIFWQSS YDCSGASVLG  
WGDGYIIGEE DKGKGRMKNS ASSAAEQEHR KKVLRRELNSL IAGPSSVTDD  
AVDEEVDTE WFFLVSMQTS FVNGSGLPGQ ALFNGSPVWV AGSERLGTSP  
CERARQGQVF GLQTLVCIPS ANGVVELGST ELIFQSSDLM NKVKVLFNFN  
SLEVGSWPIG TTNTDQGEND PSSWLTDPE TKDGNAGIPS TTPAHQTANN  
NNHHSSSKSS QPSTAAAAAD SYSESFHSRV EFWGAQHPES GEILNFGESK RSPSSANGNF  
YSGLVTEESN KKKKSPASRG GNEEGMLSFT SGVILSSSGL VKSSGGTGGD  
SDHSDLEASV VKEADSSRVV EPEKRPRKRG RKPANGREEP LNHVEAERQR  
REKLNQRFYA LRRAVVPNVSK MDKASLLGDA ISYINELKTK LQSAESSKEE  
LENQVESMKR ELVSKDSSSP PNQELKMSND HGGRLIDMDI DVKISGWDAM  
IRIQCKMNH PAARLMSALK DLDLDVQYAN VTMNDLMIQ QATVKMGNRY  
YTQEELKVAI STKVGDA\*

> *Cajanus cajan*(C.cajan\_40694)

MTEYRSPPTM NLWTDDNSSV MEAFMSSTD SSLWLAPPQS AASTTTPGPD  
TTRAPPPPPP SQSQSLLNQE TLQQRLLQTL EGARESWTYA IFWQSSYDYS  
SGASLLGWGD GYKGEEDKG KGKAPKTTSL AEQDHRKKVL RELNSLISGP  
SASPDDLDEE VTDTEWFFLV SMTQSFVNGT GLPGQAFFNS SPVWVAGADR  
LSESACERAR QGQVFLQTL VCIPSANGVV ELASTEVIQ NPDLMNKVRD

LFNFSNPDAG SWPLNCVATD QGENDPSSLW LNPSSSVEIR DSAVAPASAN  
 ATVNKALQFE TPGSSTLTEA PSVVHVPHGN AQHPSQNNKG FFPRELNFSS SLKPESGEIL  
 SFGESKKSFL PAVTVEEKNK RSSTVSRSTI DDGMLSFTSG VILPASNMKS AATGGDS DHS  
 DLEASVVKEP DGGRVVEPEK RPRKRGRKPA NGREEPLNHV EAERQRREKL  
 NQRFYALRAV VPNVSKMDKA SLLGDAISYI NELKSKLNGL ESEKGDLEKQ  
 LDSAKKELEL TVTTKNPPP PPENEADKT TAMLVDLDID VKIIGWDAMI  
 RIQCSKKNHP AARLMAALKE LDLEVHHASV SVVNELMIQQ ATVNMGNRFY  
 TQEQLLVALS SKVG DAR

> Solanum pimpinellifolium(Sopim08g005050.0.1)

MTDYRLWSNT NTTNTCDDTM MMDSFLSSDP SSFWPASTPN RPTPVNGVGE  
 TMPFFNQESL QQRLQALIDG ARESWAYAIF WQSSVVD FAS QTVLGWGDGY  
 YKGEEDKNKR RGSSSSAANF VAEQEHRKKV LRELNSLISG VQASAGNGTD  
 DAVDEEVTDT EWFFLISMTQ SFVNGNGLPG LAMYSSSPIW VTGTEKLAAS  
 QCERARQAQG FGLQTIVCIP SPESREILNF GDSSKRFSGQ SQLGPGPGLM  
 EENKNKNKNK KRSLGSRGNN EEGMLSFVSG VILPTSTMKG SGDS DSHSLE  
 ASVVKEAVVE PEKKPRKRGR KPANGREEPL NHVEAERQRR EKL NQRFYEL  
 RSQIECLRKE LTNGGSSNYS ASPPLNQDVK IVDMDIDVKV IGWDAMIRIQ  
 CSKKNHPAAR LMAALKDLDL DVHHASVSVV NDLMIQQATV KMGSRLYAQE  
 QLRIALTSKI AESR\*

> Solanum lycopersicum(Solyc08g005050.2.1)

MTDYRLWSNT NTTNTCDDTM MMDSFLSSDP SSFWPASTPN RPTPVNGVGE  
 TMPFFNQESL QQRLQALIDG ARESWAYAIF WQSSVVD FAS QTVLGWGDGY  
 YKGEEDKNKR RGSSSSAANF VAEQEHRKKV LRELNSLISG VQASAGNGTD  
 DAVDEEVTDT EWFFLISMTQ SFVNGNGLPG LAMYSSSPIW VTGTEKLAAS  
 QCERARQAQG FGLQTIVCIP SPESREILNF GDSSKRFSGQ SQLGPGPGLM  
 EENKNKNKNK KRSLGSRGNN EEGMLSFVSG VILPTSTMKG SGDS DSHSLE  
 ASVVKEAVVE PEKKPRKRGR KPANGREEPL NHVEAERQRR EKL NQRFYEL  
 RSQIECLRKE LTNGGSSNYS ASPPLNQDVK IVDMDIDVKV IGWDAMIRIQ  
 CSKKNHPAAR LMAALKDLDL DVHHASVSVV NDLMIQQATV KMGSRLYAQE  
 QLRIALTSKI AESR\*

>Unigene0009899

MDEFIISPSSSSSFVSSLSQEISTSLEQKLQLIIQS QPDTWSYAIFWQALNEESGHFSLVWGD  
 GHFEGSKSAPLKQHTDPESPLLLERRKLIRGLHLQALIREVRSDMDMTEGVDEDVSDAEW  
 FYIMSLAKTFSSRDGVVGKAFSSGSLVWLN GESQLQFYKCERAKEAHTHGIVTMVCPTS  
 NGVLELGSTVLIKENWGLVQQA KSLFDSEPALPNNESILFDQDISFADTGIVSEPAVLNTVV  
 PVQSQQLRSDYPDPGCGGSVRIVKKRGRKPGMGRET PNVNHVEAERQRREKL NHRFYALR  
 AVVPTVSKMDKASLLSDAVSYINSLNAKIEEMERQLHG HESKRKVKVEMSSDTATDNHSTT  
 TTATTTTLTTTVPPSSIDQIESSSYQVPLEVEIKFVGTDAMIRIQSDNNNYP SARL MYALREL  
 ELSVQHASISCVNGLMIQDVVVKVPNGLISSGDELKASLKEKM

> Populus trichocarpa(Potri.002G176900.1)

MEELIISPSS PSSPVLSQE TPPTLQQLRQ FIVQNQPDWW SYAIFWQTSN DDSGRIFLGW  
 GDGHFQGSKD TSPKPNTFSN SRMTISNSER KRVMMKGIQS LIGECHDLDM  
 SLMDGNDATD SEWFYVMSLT RSFSPGDGIL GKAYTTGSLI WLTGGHELQF  
 YNCERVKEAQ MHGIETLVC I PTSCGVLELG SSSVIRENWG LVQQA KSLFG

SDLSAYLVPK GPNNSSEPT QFLDRSISFA DMGIIAGLQE DCAVDREQKN  
 ARETEEANKR NANKPGLSYL NSEHSDSDFP LLAMHMEKRI PKKRGRKPGL  
 GRDAPLNHVE AERQRREKLN HRFYALRAVV PNVSRMDKAS LLSDAVSYIN  
 ELKAKVDELE SQLERESKKV KLEVADNLDN QSTTTSDVQS ACRPNSAGGA  
 GLALEVEIKF VGNDAMIRVQ SENVNYPASR LMCALRELEF QVHHASMSCV  
 NELMLQDVVV RVPDGLRTEE ALKSALLGRL E\*

> *Azadirachta indica*(Neem\_11684\_f\_1)

MEDLIISPSS SSSLVSLTPE TPPPTLQQL QFIVQSQPDC WAYAIFWQTS NDDHGHLFLA  
 WGDGHYQGTK DTSPKISNVG NLPMPALNLE RKRVIKGIQQ SFIGDHQTHE  
 IDMSMMNGSD VTDPEWFYVM SVARSFSAGD GIPGRALSTG SLVWLTGSHE  
 MQFYNCERAK EAQMHGIETF VCIPTSCGVLELGSCDVIRE NWGLVQQVKS  
 LFSSDLTALV TKQLNPTPGP IQFLDRNISF ADIGIIAGIQ EEDTTPEEKK NKQQKEAKES  
 TVKPGQPSYV DSEHSDSDCP LLTVSNIEKR TPKKRGRKPG LGRETPLNHV  
 EAERQRREKL NHRFYALRAV VPNVSRMDKA SLLSDAVSYI NELKGKIDEL  
 ESQIQRESKK VKLEISDNMD NQSTTTSDVQ TRASSGSGSG SGGGSNLEVE  
 VKIVGKDAMI RVQSENVNYP AARVMSALRD LEFPVHHASM SCVNDLMLQD  
 FVVRVPDGLR TEDGLKSALL RLEQ

> *Juglans regia*(WALNUT\_00017075-RA)

MEDLIISPSS SSSLVSNLPQ EAPPTLQQL QFIVQSQPEW WAYAIFWQTA NDDNGHVFLA  
 WGDGHFHHGNK DTSRKLSHSN NTHPIVLHS ERKNFMRDIQ SMIGESNQDI  
 DNMSINADVS DAEWFYIMSL TRSFSAGEGV PGRAYSTNSL VWLTGGRDQL  
 FYNCERAKEA QMHGIETLIC IPTSSGVLEM GSPNIIRENW GLAQQAKSLF  
 GTDLVGMLPR QQSPSSGPIQ FLERNISFAD IGIIAGVPGD DNSGEEKKKG AIGGKKQSIK  
 GGQSPYVDSE HSDSDCPLIA LNVEKRTPKK RGRKPGLGRD TPLNHVEAER  
 QRREKLNHRF YALRAVVPNV SRMDKASLLS DAVSYINELK TKIDELESQLE  
 QRDSKKVKLE LADTMDNQST TTSVNQTRPN SSGFALEVEV KIVGVDAMIR  
 VQSENVNYP ARLMCALRDL EFQVHHASMS CVNELMLQDA VVKVPDGLRS  
 EEGLKTALLR RLEQ

> *Salix purpurea*(SapurV1A.0003s0670.1.p)

MEELIISPSS SSPLVSLSQE TPSTLHQRLQ LVVQNQPDWW SYAIFWRTLN DDSGRLFLGW  
 GDGHFQGSKD TSPKLNTVSN SRMTISNTER KRGMMKGIQS LIGECHDLDM  
 SLMDGTDATD SEWFYVMSLT RSFPPGDGIL GKAYTTGSLI WLTGGHELQF  
 YNCERAKEAK MHGIETLVC I PTSCGVLELG SSCAIRENW LVQQAKSLFG  
 SDLNAFLVPK GPSNPSEPT QFLERNISFA DIGIVAGLQE DGASDRGQKS  
 AHETEAAKHH GANKAGQSYL SSEHSDSDFP LLAMHVEKRV PKKRGRKPVL  
 GRDAPLNHVE AERQRREKLN HRFYALRAVV PNVSRMDKAS LLSDAVSYIN  
 ELKAKVDELE SQLERDSESK KVKLEVADNT DNQSTTTSDV QSACRPNSSP  
 GGAAHEVEVK FVGSDAMIRV QSENVNYPAS RLMCALRELE FQVHHASMSC  
 VNELMLQDVV VRVPDGLRAE EALKSALLGR LE\*

> *Sesamum indicum*(XP\_011094312.1)

MDDLIVSPSS SSSILSSVSP HQQLPPTLQK RLQYILQHQP DWWAYAILWQ TSKDDNGRIS  
 LSWADGHFQG TKEKNPKSGS QPERKKVMRG IQALIGENPD ITGPVDGDVT  
 DAEWFYVMSL AQSFSLGDGV VGKAFNSGSL IWLSGGNQLR FYNCQRAKEA  
 QIHGMQTMVC IPTLNGVLEL GSDVMITENW SLVQQVKSLEF ESSSDPINNG

|            |            |            |            |            |
|------------|------------|------------|------------|------------|
| STHALKFPEK | TISFADTCLL | PNLPDEAAKT | TPVLGKKQEQ | PNSKAQKAQI |
| FSYLDSEHSD | SDCQFFLPET | VETKRTPKKR | GRKPNLGRDA | PLNHVEAERQ |
| RREKLNHRFY | ALRSVVPNV  | RMDKASLLSD | AVSYIKELKS | KVEELETQLQ |
| RESKKVKTET | TAETLDNQST | TTSVDQVGPI | TSLLEVEVKI | VGVDGMIRVQ |
| SDNGNYPAA  | LMDAIRELEL | QVHHASMSCV | NDLMLQDVVI | RVPDGLRCEK |

ALKAALIRRL EAQ

> *Populus trichocarpa*(Potri.014G103700.2)

|            |            |            |            |            |            |
|------------|------------|------------|------------|------------|------------|
| MEGLIISPSS | SSSLVLSHE  | TPPTLQQLRQ | FIVQSQPDRW | SYSIFWQASK | DDSGQIFLAW |
| GDGHFQGSKD | TSPKLSTNN  | SRMSTSNER  | KRVMKGIHSL | LDECHDLMS  |            |
| LMDDTDSTDT | EWFYVMSLTR | SFSPGDGILG | KAYTTGSLIW | LTGGHELQFY |            |
| NCERVKEAQM | HGIETLICIP | TSCGVLELGS | SCVIRENWGI | VQQAQSLFVS |            |
| DLNSCLVPKG | PNNPCQEQI  | FLDRNISLAD | GGIAGLQED  | DHTIEHGEKR |            |
| TQERAETKKD | NVNKLQSYV  | DSEHSDSDFH | FVAVNIERRI | PKKRGRKPGL |            |
| GRGAPLNHVE | AERQRREKLN | HRFYALRAV  | PNVSRMDKAS | LLSDAVSYIN |            |
| EMKAKVDKLE | SKLQRESKKV | KLEVADTMDN | QSTTTSVDQA | ACRPNSNSGG |            |
| AGLALEVEVK | FVGNDAMIRV | QSDNVNYPGS | RLMSALRDLE | FQVHHASMSS |            |

VNELMLQDVV VRVPDGLRTE EALKSALLGR LEQ\*

> *Populus trichocarpa*(Potri.014G103700.1)

|            |            |            |            |            |            |
|------------|------------|------------|------------|------------|------------|
| MEGLIISPSS | SSSLVLSHE  | TPPTLQQLRQ | FIVQSQPDRW | SYSIFWQASK | DDSGQIFLAW |
| GDGHFQGSKD | TSPKLSTNN  | SRMSTSNER  | KRVMKGIHSL | LDECHDLMS  |            |
| LMDDTDSTDT | EWFYVMSLTR | SFSPGDGILG | KAYTTGSLIW | LTGGHELQFY |            |
| NCERVKEAQM | HGIETLICIP | TSCGVLELGS | SCVIRENWGI | VQQAQSLFVS |            |
| DLNSCLVPKG | PNNPCQEQI  | FLDRNISLAD | GGIAGLQED  | DHTIEHGEKR |            |
| TQERAETKKD | NVNKLQSYV  | DSEHSDSDFH | FVAVNIERRI | PKKRGRKPGL |            |
| GRGAPLNHVE | AERQRREKLN | HRFYALRAV  | PNVSRMDKAS | LLSDAVSYIN |            |
| EMKAKVDKLE | SKLQRESKKV | KLEVADTMDN | QSTTTSVDQA | ACRPNSNSGG |            |
| AGLALEVEVK | FVGNDAMIRV | QSDNVNYPGS | RLMSALRDLE | FQVHHASMSS |            |

VNELMLQDVV VRVPDGLRTE EALKSALLGR LEQ\*

> *Theobroma cacao*(Thecc1EG005064t1)

|            |            |             |            |            |            |
|------------|------------|-------------|------------|------------|------------|
| MEELIISPSS | SSSLVSFSQE | TPPSTLQQLRQ | QFVIQSQQDW | WAYAIFWQTS | NDEHGRLFLT |
| WGDGHFQGTK | DTSPKLGANI | SNIPGLNNER  | RKVMKGIQAL | IGDNHDIDMS |            |
| MIDGTDITDA | EWFYVMSLTR | SFSAGDGIPG  | KALSTGSLVW | LTGAHELQFY |            |
| NCERAREAQM | HAIETLVCIP | TSCGVLELGS  | SEMIRENWGL | VQQVKSVEFS |            |
| DLIGLVPKQS | NPNNLTGP   | IQFLDRNISF  | ADIGIAGVQ  | EEDASPDNRT | KQENHNNQTK |
| KDSTKPGQSS | YVDSEHSDSD | CPLLAMNIE   | KRTPKKRGRK | PGLGRETPLN |            |
| HVEAERQRRE | KLNHRFYALR | AVVPNVSRMD  | KASLLSDAVS | YINELKAKIE |            |
| ELESQQLREC | KKVKVEMVDA | MDNQSTTTSV  | DQAARPSNSS | SGTAGSGGLE |            |
| FDIKIMGDA  | MIRVQSENVN | YPSARLMIAL  | RDLEFQVHHA | SMSCVNELML |            |

QDIVVRVPDG LRTEGLKSA LLRRLEQ\*

> *Ricinus communis*(27964.m000352)

|            |            |            |            |            |            |
|------------|------------|------------|------------|------------|------------|
| MDELIISPSS | SSSLVSFSQG | TPPTLQQLRQ | FILQSQPDWW | AYAIFWQTLN | ADNGRIFLAW |
| GDGHFQGTRD | TSPNQATINN | KHIQSHRISS | LNSEKRGMK  | GIQALIGSDN | HDIDVSIMDG |
| SNATDAEFY  | VMSLTRSFSA | GDGVPGKALS | TGSLVWLTGR | QDLQFYNCER |            |
| AKAQMKGIE  | TLVCIPTCDG | VLELGSSDLI | RENWGVVQQA | KSLFGSDMMP |            |

|            |            |            |            |            |
|------------|------------|------------|------------|------------|
| NNPSPPIHLL | DMNISFADIG | IIAGVQEGDT | TTHANQKPQE | NDAKKESNNA |
| ESEHSDSDSS | LLAAASLDKK | TPKKRGRKPA | LGRDTPLNHV | EAERLRREKL |
| NHRFYALRAV | VPNVSRMDKA | SLLSDAVCYI | NELKAKIEEL | ESQLHRKSSK |
| RVKLEVADNT | DNQSTTTSED | QAASKPISTV | CTTTGFPPEI | EVKILANDAM |
| IRVQSENVNY | PAARLMTALR | DLEFQVHHVS | MSTVNELMLQ | DVVVRVPDGL |
| RTEEDLKTAI | FRRLEQ     |            |            |            |

> *Prunus persica*(Prupe.2G195300.2.p)

|            |             |            |             |             |            |
|------------|-------------|------------|-------------|-------------|------------|
| MEELIISPSS | SSSLVSLPQE  | TSPSLQQRLQ | FIVQSQPDWW  | SYAIFWQPSN  | DHQDNGRLFL |
| TWGDGHFQGS | KDPSAKHHNN  | PYGILSERRK | ILKGIQSLIN  | DNNPDHHQDS  |            |
| IMDHMGLDAD | VSDGEWIFYVM | SLARSFSIGE | TTISASVPGK  | AFSSGSVVWL  |            |
| TGSHELQFYN | CDRAKEAQM   | GFQTLVCIPT | PTGVLEMGGSS | DSIRENWSLV  |            |
| QQAQSLFGSD | LICSVADQPD  | PETRSPIDFI | NRNFSFADIG  | IIAGVEEEEED | DKKEVALDLT |
| MMKRKGGNPG | TGLYPDSNAN  | PKPDYSDSDG | PKRTPKKRGR  | KPGLGRDTPL  |            |
| NHVEAERQRR | EKLNHRFYAL  | RAVVPNVSRM | DKASLLSDAV  | SYINELKTKV  |            |
| DELESQVQRE | SKKVKVETGD  | NLDIQSTTTS | VEQIAKPPSS  | SANGSGLEVE  |            |
| VKIVGTDAMI | RVQSENVNYP  | SARLMAALRD | LELQIHHASL  | SCINELMLQD  |            |
| IVLKVPENMR | SEDSLKSALL  | RILDQN*    |             |             |            |

> *Prunus persica*(Prupe.2G195300.1.p)

|            |             |            |             |             |            |
|------------|-------------|------------|-------------|-------------|------------|
| MEELIISPSS | SSSLVSLPQE  | TSPSLQQRLQ | FIVQSQPDWW  | SYAIFWQPSN  | DHQDNGRLFL |
| TWGDGHFQGS | KDPSAKHHNN  | PYGILSERRK | ILKGIQSLIN  | DNNPDHHQDS  |            |
| IMDHMGLDAD | VSDGEWIFYVM | SLARSFSIGE | TTISASVPGK  | AFSSGSVVWL  |            |
| TGSHELQFYN | CDRAKEAQM   | GFQTLVCIPT | PTGVLEMGGSS | DSIRENWSLV  |            |
| QQAQSLFGSD | LICSVADQPD  | PETRSPIDFI | NRNFSFADIG  | IIAGVEEEEED | DKKEVALDLT |
| MMKRKGGNPG | TGLYPDSNAN  | PKPDYSDSDG | PKRTPKKRGR  | KPGLGRDTPL  |            |
| NHVEAERQRR | EKLNHRFYAL  | RAVVPNVSRM | DKASLLSDAV  | SYINELKTKV  |            |
| DELESQVQRE | SKKVKVETGD  | NLDIQSTTTS | VEQIAKPPSS  | SANGSGLEVE  |            |
| VKIVGTDAMI | RVQSENVNYP  | SARLMAALRD | LELQIHHASL  | SCINELMLQD  |            |
| IVLKVPENMR | SEDSLKSALL  | RILDQN*    |             |             |            |

> *Populus euphratica*(CCG010847.1)

|            |            |            |            |            |            |
|------------|------------|------------|------------|------------|------------|
| MEGLIISPSS | SSSLVLSLSE | TPPTLQQRLQ | FIVQSQPDRW | SYAIFWQASQ | DDSGQIFLAW |
| GDGHFQGSKD | TSPKLSTTNN | SRMSTSNER  | KRVMKGIHSL | LDECHDLDMS |            |
| LMDGTDSTDI | EWFYVMSLTR | SFSPGDGILG | KAYTTGSLIW | LTGGHELQFY |            |
| NCERVKEAQM | HGIETLICIP | TSCGVLELGS | SCVIRENWGI | VQQVRSFLVS |            |
| DLNPCLVPKG | PNNPCQEPIQ | FLDRNISLAE | GAIHAGLQED | DNTIEHGEKR |            |
| TQERAETKKD | NVNKLQSYV  | DSEHSDSDFH | FVAVNIEKRI | PKKRGRKPGL |            |
| GRGAPLNHVE | AERQRREKLN | HRFYALRAVV | PNVSRMDKAS | LLSDAVSYIN |            |
| EMKAKVDKLE | SQLQRESKKV | KMEVADTMDN | QSTTTSVDQA | ACRPNSNSGG |            |
| AGLALEVEVK | FVGNDAMIRV | QSDNVNYPAS | RLMSALRDLE | FQVHHASMSS |            |
| VNELMLQDVV | VRVPDGLRTE | EELKSALLGR | LEQ        |            |            |

> *Carica papaya*(evm.model.supercontig\_141.19)

|            |            |            |            |            |            |
|------------|------------|------------|------------|------------|------------|
| MDELIISPSS | SSSLVSFSQE | PTTALQQRLQ | FIVQTQPESW | AYAIFWQTLN | DDNGRIYLGW |
| GDGHFQGAKE | NNTSTNTNHH | LFHTHRRKDV | MKGIQALLGD | THNDMINVSM |            |
| MDGSDVTDVE | WFYVMSLTRS | FPAGDGGPGK | ALTTGSLVWL | TGGHELQLYS |            |
| CDRAKEANMH | GIETLVFVPT | SNGVLELGSS | DLIRENWSLV | QQVKSLFASD |            |

LITLVSKQPS PNPTPIFLD RNISFADIGI IAGVQEEDAS PKDRDNKEPR KDSSPAKPGQ  
SSFVDSNSD SDCPLMNNVG PIVEKKLHKK RGRKPGLGRE TPLNHVEAER  
QRREKLNHRF YALRAVVPNV SRMDKASLLS DAVYYINELK GKIEELESQ  
QKESKKVKLE MADNLETQST TTSVDQTKSN NSGTGSGGSN IGGGLEIEVK  
VVGNDVIRV QSENVNYPAA RLMSALRELE FQVHHASMSC INELMLQDIV  
VRVPEASRTD QDALKSALLR RLDHQ\*

> Castanea mollissima(augustus-gene-0.8)

MEELIIPSS SSSLVSLPQE TPPTLQQLQ FIVQSQPEWW AYAIFWQTTN ASDNGHHLFL  
SWADGHFQGT KDTSPKLSHI NTHYPISMLH SERRKFMRDI QSSILSTTTT TNNDNSLDHM  
SINADVTDE WFYVMSLTRS FSVGDGVLGK AFGTNSLVWL TGGHELQFYN  
CERAKEAQM HGVETLVCIPT SCGVLELGSQ DIIRENWGLV QQVKSFFGSD  
LIGLVPKQAN QSSPSPIQL DRNISFADIG IAGIQEEDD SQEEHRKGGV LEGSAKKECV  
KLGGSQSYVD SEHSDSDCPL IAVNNIEKRT PKKRGRKPGL GRDTPLNHVE  
AERQRREKLN HRFYALRAVV PNVSRMDKAS LLSDAVSYIN ELKTKIDELE  
SQLQRESKKV KLEMTDTMDN QSTTTSVDQT RPNVTNSGSV LEVEVKMVGP  
DAMIRVQSEN VNYPGARLMG ALRDLELQVH HASMSCVNEL MLQDVVVKVP  
EGLRAEEALK SALLGRLEQ

> Salix purpurea(SapurV1A.0162s0110.1.p)

MEELIIPSI SSSLVSLSHE TPPTLQQLQ FIVQSQPDWW SYAIFWQTSK DDSGQTFLAW  
GDGHFQGSKD TCPKPSTVHN SRMSTNSER KSVMKGIQPL IDECHDLDT  
LMDDTDATDS EWFYVMSLTR SFSAGDGILG KAYTTGSLIW LTGVHELQFY  
SCERVKEAQM HGIETLICIP TSCGVLELGS SNLIRENWGI VQAKSLFGS DLTSLVSKG  
PSNPCQEQ FLDGNISVAD GGTVAGLQEE DHTTDHGEKK AQERAEAKKD  
SVNKPQGSYV DSEHSDSDIH LAAVNIEKRV PKKRGRKPGL VRDAPLNHVE  
AERQRREKLN HRFYALRAVV PNVSRMDKAS LLSDAVSYIN EMKAKVDELE  
SQLQRESKKL KLEVSDNTDN QSTTTSVDQA ACRPSSNSGG AGLALEIEVK  
FVGNDAMIRV QSETVNYPGS RLMSALRDLE LQVHHASMS LNELMLQDVV  
VRVPDHGLRT EEALKSALLG RLEQ\*

> Fragaria vesca(mrna18651.1-v1.0-hybrid)

MDDLIIPTS SSSLVSLPHE PATLQQLQF ILQSQPELWS YAIFWLASND VENGRLLLGW  
GDGHFQGPED PSPDLNNRLS SSGDGSLLHS DRRKILKGIQ SILNDTNNNN  
PELMDNFMAL NGDVSDAEW FYVMSLTRSF AIGDGSVPGK AFGSGSFVWL  
SGAHELQFNS CERAKEAQIH GIETLICIPT SNGVLEMGS GLVRENWGLI  
QAKSLFGSD QPDPETRPLE FINRNFSAD IGIVAGVQEE DNSSYNDDKK  
HVLGYNKKKN NNLQNPTPA DFADSDFQLK RTPKKRGRKP GMGRDTPLNH  
VEAERQRREK LNHRFYALRA VVPNVSRMDK ASLLDAVSY INELKAKVDE  
LESQLESK KVKVEMADNL DNQSTTTTAS VEQTQTVTPD NNNNNNNGSG  
LEIEVKIVGT DAMIRVQSEN VNYP SARLMT AMRDLEFQIH HASLSSINDL  
MLQDIVVKVP DNMKNEEGLK AALLGILDQN E

> Morus notabilis(XP\_010100678.1)

MEDLMISPSS SSSLISLSTH EASPPTLQQR LQFIVKSQPD WWAYAIFWQT SNDDNGRLFL  
AWGDGHFQGV KDTISPINSN SSNNNNHYSA VSAGIHAERR KMLKGIQSLI  
NDNNLPIDN IMAINGDVTD AEWFYVMSLT RSFLAGDGPV GKAFSTGSLV  
WLTGVHELQF YNCERAKEAQ MHGIETLVC PTSTGVLELG SSEIIRENWC

LVQQVKSLFG SDLYTNQNDT GPIQFLNGNI SFADIGIAG VQEEDKYSPD EIKKKETLDL  
MMMKKRKKKE GNSAYVDSEH SDSDCPLITV NNNNNNNIST GEKRAPKKRG  
RKPGLGRDTP LNHVEAERQR REKLNHRFYA LRAVVPNVSR MDKASLLSDA  
VSYINELKAK IDDESQQLR DQSNKKVKLE AADTMSLDNQ STTTSVDQTK  
PPNSNSSSNK SNNINSVTGN INGLEIEVKI IGTDAMIRVQ SENVNYP SAR LMGALRDLEF  
QVHHASVSSI NDLMLQDVVV KIPEGIVLMR TQEGLSALL RRLEQ

> Manihot esculenta(XP\_010100678.1)

MEELIISSSS SSSSSSSLVP SSQETPTTLH QRLQSMQSQ PDWWAYAIWF QTSNDETART  
FLAWGDGHFQ GTRDTSPTLT TINNRLQHRI PTFNFESKRS VKGIQALIGE NLDIDVSMMD  
DNDVPDVEWF YVMSLTRSFL AGEKIPGKAL STGSLVWLTG AQELQFYNCE  
RAKEARMHGL QTLVCIPTFN GVLELGSSDM IRENWGLVQQ VKSLFGSDLA  
DLMPKPNPNT TVPVQLDMN ISFADIGIA GIKGDDDALE ERFAQELEAK  
KESAKAGLPY VHSEHSDSDC PFLAPMTINK RAPKKRGRKP GQGRDTPLNH  
VEAERQRREK LNHRFYALRA VVPNVSRMDK ASLLSDAVSY IKELKAKIEE  
LESQKRENS KRVKLEGTDN TDNQSTTTTV DQAGPNTDGS EFQLEIDVKI  
LGNDAMIRVQ SENVNPNGAR LLGALRDLEL HVHHASMSTV NELMLQDVMV  
RLASGFTTEE ELKSTLLQIL EE\*

> Pyrus bretschneideri(Pbr018411.1)

MEELIISPSS SSSLVSLPQE NHPSLQQLRQ FILQSQPDWW SYAIFWQTSN DRQVDNGCLF  
LTWGDGHFQG PKDASPNNHH HNPYGVLSER RKILKGIQSL INDNNPDNH  
HQDLILDNMG LNADVTDVEW FYVTSLARSF SVGESISTNV PGKAFSSGSL  
VWLTGSHELQ FYNCERAKEA QMHGIQTLVC IPTPTGVLEL GSSDLIRENG  
NLVQQTESLF GADVWVGQPD PGTRSPIDLI NRNFSFADIG IAGVEEEDD  
KKEVALDITA MKKKCGRACP GLLQLSNLNS LNPEHSDSEF PKRTPKKRGR  
KPGLGRDTPN NHVEAERQRR EKLNRHFYAL RAVVPNVSRM DKASLLSDAV  
SYINELKSKV DELESQVQRE SKKVKVETGD NLDNQSTTTS VEQTRPPNSS  
ASGSTGLEME VKIVGSDAMI RVQSANVNYP SARLMAALRD LEFEIHHASL  
SCMNELMLQD VVVKVPDNMR SEESIKAALL KILDQN\*

> Actinidia chinensis(Achn310341)

MDEFIISSSS SSSFVSSQES SPTLQKRLEF IVQNQPEWWA YAIFWQSSKD DHGRLLLAWG  
DGHFQGTKDA VPKHIATLHE PMDGEVVTDA ECFYVVSLSR SFSAGDGPVW  
KSFSSGSLVW LAGTHQLQFY NCERVKEAQI HGIQTLVCIP TSCGVVELGS  
CDVITENWGL VQQAQSLFGS DLISVPKPNP PSDGSIQFVE GNVSFADIGI  
ITGLEEDPMN SESEHSDSDC AAVKERTEQQ QKIPKKRGRK PGVGRETVPN  
HVEAERQRRE KLNHRFYALR AVVPNVSRMD KASLLSDAVS YIQELKAKVE  
DLESQVHDPR DSCKKVKMEV ADNQSTTTSV DHSLSMSGVP LEVEVKIVGL  
DAMIRVQSDN ANHPTARLMD ALRDLELSVH HGSMSSVNDL MLQDVVIRAP  
QGLSGEDELK AALLKRLG\*

> Gossypium arboreum(Cotton\_A\_15640\_BGI-A2\_v1.0)

MEDLIISPSS SSSLVSFSQE TPSPTLQQLR QFVIQSQQDL WAYAILWQTL NDDLGRFLA  
WGDGHLQCTK DASPRLSSSF HSERTKVIKG IQALIGDQHD IDLSMIDGTD  
ITDVEWFYMM SMARSFSAGE GIPGKALSTG SLVWLTGAHE LQFYNCERAR  
EAQMHGLETLCIPTSCGVL ELGSSEIIRE NWGLVQQVKS LFESDLIGLV PKQSTPPNLT  
PASVQFLNRN ISFADIGIA GVQEEDGASQ DIKTKQEHNN NQTKKDSSKL



GQPSYVDSEH SDSDFLLAM NNVEK RTPKK RGRKPGLGRE TPLNHVEAER  
QRREKLNHRF YALRAVVPNV SRMDKASLLS DAVSYINDLK AKIDELESQ  
QRECKKVKVE MVD TMDNQST TTTT TSEEEQ QAARPSYSSP GTGSGIELEI  
KIMVNDAMIR VHSENVNYP ARLMGALRDL EFQVRHASMS SVNDLMLQDI  
VVRLPDGLRT EEGLKSALLR RDLQ

> *Gossypium hirsutum*(Gh\_D11G1055)

MEVLIMSPSS CSSLV SFSQE TPSSTLQQRL QFVIQSQQDL WAYAIFWQTL NDDLGNLFLA  
WGDGHLQCTK DASPRLSSSF HSERTKVMKG IQALIGDHHD VDM SMIDGTD  
ITDVEWLYMM SMTRSFSAGE GIPGKALSTG SLVWLTGAHE LQFYNCERAR  
EAQMHGLET LVC IPTSCGVL ELGSSEIIRE NWGLVQQVKS LFESDLIGLV PKQSTPPNLT  
PASIQFLDRN ISFADIGIIA GVQEEDDASQ DIKTKQEHSN NQTKKDSSKL GQPSYVDSEH  
SDSDFLLAM NNVEK RTPKK RGRKPGLGRE TPLNHVEAER QRREKLNHRF  
YALRAVVPNV SRMDKASLLS DAVSYINDLK AKIDELESQ QRERKKVKVE  
MVD TMDNQST TTTT TSEEEQ QATRPSYSSP GTGSGIELEV KIMVNDAMIR  
VHSENVNYP ARLMGALRDL EFQVHHASMS SVNDLMLQDI VVRLPDGLRT  
EEGLKSALLR RDLQ

> *Gossypium hirsutum*(Gh\_A11G0909)

MEDLIISPSS SSSLV SFSQE TPSPILQQRL QFVIQSQQDL WAYAILWQTL NDDLGRFLA  
WGDGHLQCTK DASPRLSSGF HSERTKVIKG IQALIGDQHD IDLSMIDGTD  
ITDVEWFYMM SMARSFSAGE GIPGKALSTG SLVWLTGAHE LQFYNCERAR  
EAQMHGLET LVC IPTSCGVL ELGSSEIIRE NWGLVQQVKS LFESDLIGLV PKQSTPPNLT  
PASVQFLNRN ISFADIGIIA GVQEEDGASQ DIKTKQEHN NQTKKDSSKL  
GQPSYVDSEH SDSDFLLAM NNVEK RTPKK RGRKPGLGRE TPLNHVEAER  
QRREKLNHRF YALRAVVPNV SRMDKASLLS DAVSYINDLK AKIDELESQ  
QRECKKVKVE MVD TMDNQST TTTT TSEEEQ QAARPSYSSP GTGSGIELEV  
KIMVNDAMIR VHSENVNYP ARLMGALRDL EFQVRHASMS SVNDLMLQDI  
VVRLPDGLRT EEGLKSALLR RDLQ

> *Gossypium raimondii*(Gorai.007G111800.1)

MEVLIMSPSS SSSLV SFSQE TPSSTLQQRL QFVIQSQQDL WAYAIFWQTL NDDLGNLFLA  
WGDGHLQCTK DASPRLSSSF HSERTKVMKG IQALIGDHHD VDM SMIDGTD  
ITDVEWLYMM SMTRSFSAGE GIPGKALSTG SLVWLTGAHE LQFYNCERAR  
EAQMHGLET LVC IPTSCGVL ELGSSEIIRE NWGLVQQVKS LFESDLIGLV PKQSTPPNLT  
PASIQFLDRN ISFADIGIIA GVQEEDDASQ DIKTKQEHSN NQTKKDSSKL GQPSYVDSEH  
SDSDFLLAM NNVEK RTPKK RGRKPGLGRE TPLNHVEAER QRREKLNHRF  
YALRAVVPNV SRMDKASLLS DAVSYITDLK AKIDELESQ QRERKKVKVE  
MVD TMDNQST TTTT TSEEEQ QATRPSYSSP GTGSGIELEV KIMVNDAMIR  
VHSENVNYP ARLMGALRDL EFQVHHASMS SVNDLMLQDI VVRLPDGLRT  
EEGLKSALLR RDLQ\*

> *Ipomoea trifida*(Itr\_sc010930.1\_g00001.1)

MDELIGTSSS SSSITASLSQ PNHSTLQQRL QFILKTQ TDS WAYAIFWQTS NEDDGRFLA  
WGDGFFQGTK GGGRGGVQTS HSTQQSERKK VISGIQALIG TQNSENGDLI  
TDAEWFYVMS LARSFSAGDG VPGKALSMGS LVWLTGAHRL QMYNCERAKE  
AQIHGIQTLV CIPTGAGVVE LGSLEI IKEN WTLVQQVKS LFPFPQETTLS FADIGLVSTH  
ELQQGRPGDA EKQEAPKRG A DPESHS DSD CLFLKEHPSV DRQQQQQQNA

PKKRGRKPGA GRDTPVNHVE AERQRREKLN HRFYALRSVV PNVSRMDKAS  
LLSDAVSYIN SLKTKVEELE CRQLQLRESK KVKIEAVGDN QSSTSAASSA  
ASPVDVEVKI VGPDMIRVQ SENANYPsak LMNGLRELEL AVHHASISSV  
NDIMLQDIVV KVPEGLRSED GLRAALLRRL DQH

> Citrus sinensis(orange1.1g046178m)

MEDLIISPSS SSSLVSLTPE TPPPTLQQRL QFIVQSQPEW WAYAIFWQTI SNDDNGQLFL  
AWGDGHYQGT KDASPRARMS MPAPAPGAAL DNNMERKRAI SSIRGIQQSF  
MGHEMDLSMM DGGDVTDTTEW FYVMSLTRSF GAGVGIPGRA QSSGSLVWLT  
GSHELQFYNC ERAKEAQSHG IETFVCIPTS CGVLELGSSD LIRENWGLVH  
QVKSFLGSDL ITKPLNPNT PAAPPMHFLD RNISFADIGI IAGVQQEQEE EEEEEELSR  
PEEEDQNKVK KPRKDQGCTV KSSTGQSSYT VDSEHSDSDC PLPPPNNIS  
AVEKRTPKKR GRKPGLGRET PLNHVEAERQ RREKLNHRFY ALRAVVPNVs  
RMDKASLLSD AVSYIRELKV KIDDLESQLL QRESKKVKLE ISDNHSTTTS  
VDQARPSSAG SGGGFNLEVE TKIMGSDAMI RVQSENVNHP AAKLMSSLRD  
LDLQLHHASM SCVNDLMLQD IVVRVPDGLR TEDALRSALL RRLDQ\*

> Citrus clementina(Ciclev10019749m)

MEDLIISPSS SSSLVSLTPE TPPPTLQQRL QFIVQSQPEW WAYAIFWQTI SNDDNGQLFL  
AWGDGHYQGT KDASPRARMS MPAPAPGAAL DNNMERKRAI SSIRGIQQSF  
MGHEMDLSMM DGGDVTDTTEW FYVMSLTRSF GAGVGIPGRA QSSGSLVWLT  
GSHELQFYNC ERAKEAQSHG IETFVCIPTS CGVLELGSSD LIRENWGLVH  
QVKSFLGSDL ITKPLNPNT PAAPPMHFLD RNISFADIGI IAGVQQE EEEEEELSR  
PEEEDQNKVK KPRKDQGCTV KSSTGQSSYT VDSEHSDSDC PLPPPNNIS  
AVEKRTPKKR GRKPGLGRET PLNHVEAERQ RREKLNHRFY ALRAVVPNVs  
RMDKASLLSD AVSYIRELKV KIDDLESQLL QRESKKVKLE ISDNHSTTTS  
VDQARPSSAG SGGGFNLEVE TKIMGSDAMI RVQSENVNHP AAKLMSSLRD  
LDLQLHHASM SCVNDLMLQD IVVRVPDGLR TEDALRSALL RRLDQ\*

> Gossypium raimondii(Gorai.001G151700.1)

MEELIISPSS SSSLVYMTQE TSPSTLQQRL QFVVQSQQIW WTYAIFWQTS NDEHGRLYLC  
WGDGYFQGT KGTPPKLLSA NNSCLENERR KEMKGAQTLI RDNHEVDVSM  
MDGTTGVSDA VWFYVMSLTR SFPAGEGIPG MALSTGSLVW LTGAHALQFY  
NCERAIEAQM HGIETMVCIP TSCGVLELGS VEMISENWGL VQQVKSIFGA  
DPIDLQKQS STDPTLTPPS IPFLDRNISF ADIGIISGVE EEEEDVGPDN ETKQEHNNHP  
TKKYFTKLQ SSSVDSEHSD SDRPSLAMSH LEQKTPQKRG RKPGLGRETP  
LNHVEAERQR REKLNHRFYA LRAVVPNVSR MDKASLLSDA VSYINELKAK  
IEELESQQR ECKKPKVEMV DVTDNHSTTT SVEQEAAPD NSPSPATAGC  
VGLEFDIKIM GNDAMIRVQS ENANYPVTRL MVALRDLEFP IHHASMSCVN  
ETMLQDIVVN VPDLELRNEQ GLKSALLRRL DH\*

> Gossypium hirsutum(Gh\_A07G1232)

MEELIISPSS SSSLVYMTQE TSPSTLQQRL QFVVQSQQIW WTYAIFWQTS NDEHGRFLC  
WGDGYFQGT KGTPPKLLSA NISCLNERR KEMKGAQTLI GDNHEVDVSM  
MDGTTGVSDA EWFYVMSLSR SFPAGEGIPG MALSTGSLVW LTGAHALQFY  
NCERAIEAQM HGIETMVCIP TSCGVLELGS VEMISENWGL VQQVKSIFGA  
DPIDLLQKQS STDPTLTRPS IPFLDRNISF ADMGIVSGVE EEEENVGPVN  
ETKQEHNNHP TKKYSTKLQ SSSVDSEHSD TDRPSLAMSH LEQKTPQKRG

RKPGLGRETP LNHVEAERQR REKLNHRFYA LRAVVPNVSR MDKASLLSDA  
VSYISELKAK VEELESQ LQR ECKKPKVEMV DVTDNQSTTT SVEQEAAKPD  
NSPSPATAGC VGLEFDIKIM GNDAMIRVQS ENMNYPVTRL MVALRDLEFP  
IHHASMSCVN ETMLQDIVVN VPDLELRNEQ GLKSTLLRRL DH

> Arabidopsis thaliana(AT5G46830.1)

MINTDDNLLM IEALLTSDPS PLLPANLSL ETTLPKRLHA VLNGTHEPWS YAIFWKPSYD  
DFSGEAVLKW GDGVYTGGNE EKTRGRLRRK KTILSSPEEK ERRSNVIREL  
NLMISGEAFP VVEDDVSDDD DVEVTDMEWF FLVSMTWSFG NGSLAGKAF  
ASYNPVLVTG SDLIYGS GCD RAKQGGDVGL QTILCIPSHN GVLELASTEE  
IRPNSDLFNR IRFLFGGSKY FSGAPNSNSE LFPFQLESSC SSTVTGNPNP SPVYLQNRYN  
LNFSTSSSTL ARAPCGDVLS FGENVKQSFE NRNPNTYSDQ IQNVVPHATV  
MLEKKKGKKR GRKPAHGRDK PLNHVEAERM RREKLNHRFY ALRAVVPNVS  
KMDKTSLLED AVCYINELKS KAENVELEKH AIEIQFNELK EIAGQRNAIP  
SVCKYEEKAS EMMKIEVKIM ESDDAMVRVE SRKDHHPGAR LMNALMDLEL  
EVNHASISVM NDLMIQQANV KMGLRIYKQE ELRDLLMSKI S

> Arabidopsis thaliana(AT1G32640.1)

MTDYRLQPTM NLWTTDDNAS MMEAFMSSSD ISTLWPPAST TTTTATTETT  
PTPAMEIPAQ AGFNQETLQQ RLQALIEGTH EGWTYAIFWQ PSYDFSGASV  
LGWGDGYKYG EEDKANPRRR SSSPPFSTPA DQEYRKKVLR ELNSLISGGV  
APSDDAVDEE VTDTEWFFLV SMTQS FACGA GLAGKAFATG NAVVWSGSDQ  
LSGSGCERAK QGGVFGMHTI ACIPSANGVV EVGSTPIRQ SSDLINKVRI  
LFNFDGGAGD LSGLNWNLDP DQGENDPSMW INDPIGTPGS NEPGNGAPSS  
SSQLFSKSIQ FENGSSSTIT ENPNLDPTPS PVHSQTQNP K FNNTFSREL N FSTSSSTLVK  
PRSGEILNFG DEGKRSSGNP DPSSYSGQTQ FENKRKRSMV LNEKDVLSFG  
DKTAGESDHS DLEASVVKEV AVEKRPKKRG RKPANGREEP LNHVEAERQR  
REKLNQRFYA LRAVVPNVSK MDKASLLGDA IAYINELKSK VVKTESEKLQ  
IKNQLEEVKL ELAGRKASAS GGDMS SSCSS IKPVGMEIEV KIIGWDAMIR  
VESSKRNHPA ARLMSALMDL ELEVNHASMS VVNDLMIQQA TVKMGFRIYT  
QEQLRASLIS KIG

> Arabidopsis thaliana(AT5G46760.1)

MNGTTSSINF LTSDDDASAA AMEAFIGTNH HSSLFPPPPQ QPPQPQFNED TLQQR LQALI  
ESAGENWTYA IFWQISHDFD SSTGDNTVIL GWGDGYKGE EDKEKKKNNT  
NTAEQEHRKR VIRELNSLIS GGIGVSDEN DEEVTDTWTF FLVSMTQSFV  
NGVGLPGESF LNSRVIWLSG SGALTGSGCE RAGQGQIYGL KTMVCIATQN  
GVVELGSSEV ISQSSDLMHK VNNLFNFNNG GGNNGVEASS WGFNLNPDQG  
ENDPALWISE PTNTGIESPA RVNNGNNSNS NSKSDSHQIS KLEKNDISSV ENQNRQSSCL  
VEKDLTFQGG LLKSNETLSF CGNESSKKRT SVSKGSNNDE GMLSFSTVVR  
SAANDSDHSD LEASVVKEAI VVEPPEKKPR KRGRKPANGR EEPLNHVEAE  
RQRREKLNQR FYSLRAVVPN VSKMDKASLL GDAISYINEL KSKLQQAESD  
KEEIQKKLDG MSKEGNNGKG CGSRAKERKS SNQDSTASSI EMEIDVKIIG  
WDVMIRVQCG KKDHPGARFM EALKELDLEV NHASLSVVND LMIQQATVKM  
GSQFFNHDQL KVALMTKVGE NY

> Arabidopsis thaliana(AT4G16430.1)

MGQKFWENQE DRAMVESTIG SEACDFFIST ASASNTALSK LVSPPSDSNL

QQGLRHVVEG SDWDYALFWL ASNVNSSDGC VLIWGDGHCR VKKGASGEDY  
SQQDEIKRRV LRKLHLSFVG SDEDHRLVKS GALTDLDMFY LASLYFSFRC  
DTNKYGPAGT YVSGKPLWAA DLPSCLSYR VRSFLARSAG FQTVLSVPVN  
SGVVELGSLR HIPEDKSVIE MVKSVFGGSD FVQAKEAPKI FGRQLSLGGA  
KPRSMSINFS PKTEDDTGFS LESYEVQAIG GSNQVYGYEQ GKDETLYLTD  
EQKPRKRGRK PANGREEALN HVEAERQRRE KLNQRFYALR AVVPNISKMD  
KASLLADAIT YITDMQKKIR VYETEKQIMK RRESNQITPA EVDYQQRHDD  
AVVRLSCPLE THPVSKVIQT LRENEVMPHD SNVAITEEGV VHTFTLRPQG  
GCTAEQLKDK LLASLSQ

> *Nicotiana tabacum*(XP\_016508165.1)

MDELMVSSSS SSSSFTIPSL FSQTNQPLST LQQMLQYILK NQTDWSYAI FWQTSNEDDG  
RLFLAWGDGH FHGTVKKGE VNGVNKASSL ERKNVIKGIQ ALICENGDTV  
VEDGGDVTDI EWFYVMSLAQ SFSIGDGIPG KAFSTGSIVW LTGAQQLQFC  
SCERAKEAQV HGIETLVCIP TSNVLELGS SDLIKENWSL VQHVKSLSL  
DQENGLEKTI SFADVGLVSC LQEDGQILGN NKNNTSKKPK TGEIFSAAGT  
TLFQSDHSD SDCQVLVDKP IVEKKTPKKR GRKPGASRET PSNHVEAERQ  
RREKLNHRFY ALRSVPHVT KMDKASLLSD AVEYINELKA KVDDLELQLN  
NKSESKKKLK VESMDSTTLD NQSTTTTTT SVDQIRPNSN STSSFPGNNL TVEVEVKILG  
PDAMIRVQSE NVNYP SARLM RALQDLELHV HHASISSVND LMLQDIVVKV  
PQCLGTENDL KSALLSSLEQ

> *Nicotiana tabacum*(XP\_016449248.1)

MDELMVSSSSSSSFSIPSL FSQTNQPLST LQQMLQHVLK NQTDWSYAI FWQTSNDDDG  
RLFLAWGDGHFHGTVKKGEVNGANKASSLERKNVIKGIQALICENGDTVVEDGGDVT  
DIEWFYVMSLAQ SFSIGDGIPG KAFCTGSFVW LNGAQQQLQFC SCERAKEAQV  
HGIETLVCIP TSNVLELGS SDLIKENWSL VQVKSLSL DQENGLEKTV SFANIGLVSC  
LQENGQILAI NNNHNKNNT SKKPKTEEIS TTATAATTLF QSDHSDSDC  
QVLVDKPIVE KKTPKKRGRK PGATRETPLN HVEAERQRRE KLNHRFYALR  
SVVPHVTKMD KASLLSDAVE YINELKTKVD ELELQLNKKS ESKKKLKVES  
MDSTTLDNQT TTTTTTSVDQ IRPNSNSSS YGPNNLTVEV EVKILGPDAM  
IRVQSENVNY PSARLMRALQ DLELHVHHAS ISSVNDLMLQ DIVVKVPKCL  
GTENGLKSAL LRSLEQ

> *Nicotiana tabacum*(XP\_016435398.1)

MDGLFPLISCLLVLTSPQLLGFHYYYYSINYTVLSSCCFLFSSTYIKFMGSSSPMVDSSLPQG  
DNQLPLGLQHMLQYVIK SQPDWAYAI FWQTSTDDEG KPFLAWGDGY FQGAQGGA  
NNKGSSSDAAQSERKKVIRGIQALIDGNNNLMDDGNVTDIEWFYVMSLARSFSVDNGS  
VPGKAFSSGNFVWFTGAAQFQVYSCERAKEAQIHGIQTLLCIPTSNVLEL GSAHLIKENF  
DLVQQVKSLSLSCPIHFLE KSICFADIGL VTGLQQDNED KLEKQQLDSD KKAVAKKRGR  
KPKGGDNNINMAALNHVEAERQRREKLNHRFYALRSVNPVSRMDKASLLSDAVSYINQ  
LKAKVDELELQLIDHSSSSNKKQKSNESGENQSTNTSVDQELRPNSSLEVE VKIVGPDAMI  
RVQSENVNYP SAKLMSALRHLQLQVHHASISSVNNLMLHDVVVKVPQGLRTEDGLRTAL  
ITTLESNS

> *Nicotiana tabacum*(XP\_016462596.1)

MNEVIFPATSSFSTPALISQENQPSTLQQKLKYILNSQTDSWAYTIFWQTSNEDNNGSLLL  
WGDGHFQGTNKDIEWFYVLSLAQSYVNEGVIKVFSTATFVWLTGAQQVQFCSCERAK

EAQNNGVKTLVYVSISNGVLELGSSDIKEDWSLVQQVKSLSFSSDQENGPIYNFLDQNTIYF  
ANIDLVTGLQEDGQSENNNSKNQESKLLKFEEVATTSHVSFPDSELSASDCQLLEHPVQK  
SRVGSKKRTYKKRGRKPGEDCDKQMNHVEVERQRREKLNHRFYALRSVVPQVTRMDKA  
SLLSDAVAYINELKAKVDKLESKLHRNLELKKKLQMESNDAVDNQSSSTNSVDHTLEVEVK  
MVGPNAMIRVQSENVNYPSTRLMCALQDLELHVHHASISSVNNILLQNIVIRVPKELKTED  
GLRAALLRSLEQIEAC

> *Nicotiana tabacum*(XP\_016435399.1a)

MDGLFPLISCLLVLTSPQLLGFHYYYYSINYTVLSSCCFLFSSTYIKFMGSSSPMVDSSLPQG  
DNQLPLGLQHMLQYVIKSQPDWWAYAIFWQTSTDDEGKPFLLAWGDGYFQGAKGGA AVN  
NKGSSSDAAQSERKKVIRGIQALIDGDNNNLMDDGAAQFQVYSCERAKEAQIHGIQTLLC  
IPTSGVLELGSAHLIKENFDLVQQVKSLSFLSCPPIHFLEKSICFADIGLVTGLQQDNEDKLE  
KQQLDSDKKAVAKKRGRKPKGGDNNINMAALNHVEAERQRREKLNHRFYALRSAPNV  
SRMDKASLLSDAVSYINQLKAKVDELELQLIDHSSSSNKKQKSNESGENQSTNTSVDQEL  
RPNSSLEVEVKIVGPDAMIRVQSENVNYPsaklmsalrhLQLQVHHASISSVNNLMLHDV  
VVKVPQGLRTEDGLRTALITTLESNS

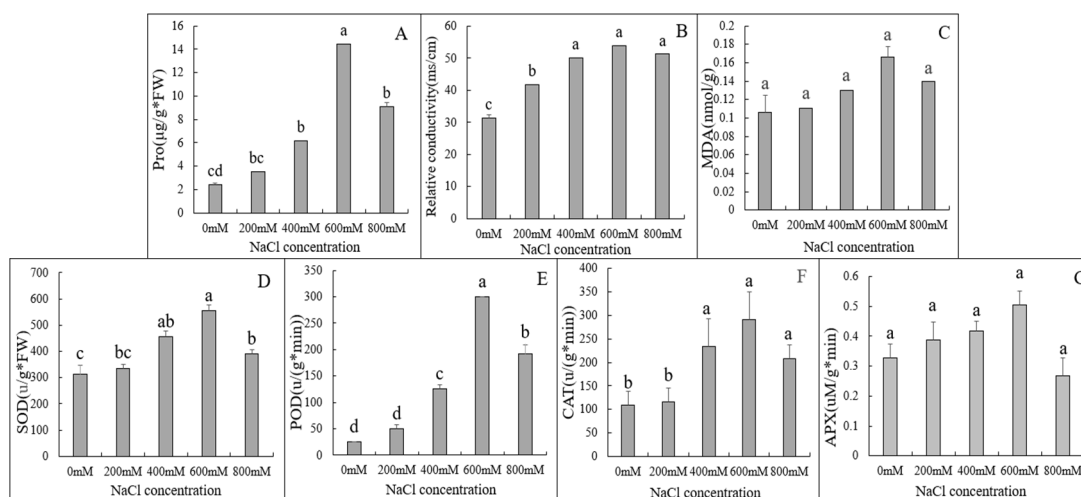

**Supplementary Figure S1.** Physiological and biochemical indexes of *G. maritima* leaves under salt stress. A-G: proline content, relative conductivity, MDA, SOD enzyme activity, POD enzyme activity, CAT enzyme activity, and APX enzyme activity under different salt concentrations. When there are significant variations across treatments ( $P < 0.05$ ), the results are denoted by different lowercase letters.

**Supplementary Table S1.** the quality of the isolated RNA samples

| Number | Sample Name | Concentration (ng/ul) | Volume (ul) | Total(ug) |
|--------|-------------|-----------------------|-------------|-----------|
| 1      | N0-1        | 258                   | 33          | 8.51      |
| 2      | N0-2        | 255                   | 33          | 8.42      |
| 3      | N0-3        | 296                   | 33          | 9.77      |

|   |      |     |    |       |
|---|------|-----|----|-------|
| 4 | N3-1 | 357 | 33 | 11.78 |
| 5 | N3-2 | 303 | 33 | 10    |
| 6 | N3-3 | 284 | 33 | 9.37  |
| 7 | N4-1 | 228 | 33 | 7.52  |
| 8 | N4-2 | 387 | 33 | 12.77 |
| 9 | N4-3 | 173 | 33 | 5.71  |

Note: N0:0mM/L NaCl stress; N3:600mM/L NaCl stress; N4:800mM/L NaCl stress.

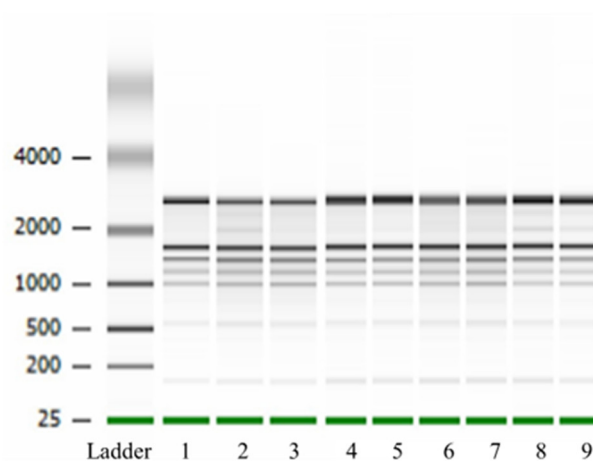

**Figure S2.** Agilent 2100 RNA 6000 Nano kit detection

Note:1-3: N0:0mM/L NaCl stress;4-6: 600mM/L NaCl stress;7-9: 800mM/L NaCl stress;

**Supplementary Table S2.** Characteristics of *G. maritima* transcriptome sequencing

| Index                 | Transcripts | Gene       |
|-----------------------|-------------|------------|
| All                   | 176,208     | 79,986     |
| GC%                   | 38.57       | 38.22      |
| Max length (bp)       | 16,681      | 16,681     |
| Median length (bp)    | 667         | 561        |
| Min length (bp)       | 183         | 201        |
| Total assembled bases | 220,150,171 | 76,483,799 |
| N50 (bp)              | 2,078       | 1,732      |

**Supplementary Table S3.** Sequencing data of *G. maritima* leaves under different salt concentrations

| Concentrations | Sequencing Data |
|----------------|-----------------|
| N0-1           | 8.48G           |
| N0-2           | 7.17G           |
| N0-3           | 8.27G           |
| N3-1           | 8.36G           |
| N3-2           | 6.82G           |

|      |       |
|------|-------|
| N3-3 | 7.99G |
| N4-1 | 6.31G |
| N4-2 | 6.45G |
| N4-3 | 6.23G |

**Supplementary Table S4.** Primer sequences used for real-time fluorescence quantitative analysis

| Gene              | Primer Sequence (5'to3') | Fragment Size (bp) |
|-------------------|--------------------------|--------------------|
| $\beta$ -Actin -F | TGGCACTTGATTACGAGCAG     | 160                |
| $\beta$ -Actin -R | GGAGCTTCCATTCCAATCAA     |                    |
| 78257-F           | TAGCGAGACAATCCTCCGTC     | 168                |
| 78257-R           | TCGAGTCTGGGTTAGCTTGG     |                    |
| 12139-F           | CTTGGGGTTCGCTTTTATCGG    | 175                |
| 12139-R           | CACAGCCGTTAAAACACCCA     |                    |
| 00457-F           | GGCTCCTCCTCCTCTTAACC     | 194                |
| 00457-R           | TCGACGCGACCATAGAATCA     |                    |
| 42139-F           | TTGGGGTTTTAACGGCTGTG     | 160                |
| 42139-R           | AGCTCTCTCACCAACACCTC     |                    |
| 27167-F           | CTGACTACCGGTTACTCCCC     | 199                |
| 27167-R           | CCGGACTGCCAAAAGATAGC     |                    |
| 09899-F           | TGCGGTGTCCTACATCAACT     | 181                |
| 09899-R           | AATTGAAGAGGGAGGGACGG     |                    |
